# Supplementary material for: Catalytic asymmetric Meerwein–Ponndorf–Verley reduction of glyoxylates induced by a chiral N,N′-dioxide/Y(OTf)3complex
Source: Royal Society of Chemistry journal article supplement (doi:10.1039/c7cc00273d), 2017-01-01
Supplement: c7cc00273d1.pdf [file c7cc00273d1.pdf]

# Catalytic Asymmetric Meerwein-Ponndorf-Verley Reduction of Glyoxylates Induced by Chiral *N,N'*-Dioxide/ $Y(OTf)_3$ Complex

Wangbin Wu,<sup>a</sup> Sijia Zou,<sup>a</sup> Lili Lin,<sup>\*,a</sup> Jie Ji,<sup>a</sup> Yuheng Zhang,<sup>a</sup> Baiwei Ma,<sup>a</sup> Xiaohua Liu<sup>a</sup> and Xiaoming Feng<sup>\*,a,b</sup>

<sup>a</sup>Key Laboratory of Green Chemistry & Technology (Sichuan University), Ministry of Education, College of Chemistry, Sichuan University, Chengdu 610064, China

<sup>b</sup>Collaborative Innovation Center of Chemical Science and Engineering (Tianjin), P. R. China

[lililin@scu.edu.cn](mailto:lililin@scu.edu.cn)

[xmfeng@scu.edu.cn](mailto:xmfeng@scu.edu.cn)

## Electronic Supporting Information

### CONTENTS:

|                                                                                          |    |
|------------------------------------------------------------------------------------------|----|
| (A) General information .....                                                            | 2  |
| (B) Optimization of the conditions for the asymmetric MPV reaction of glyoxylates.....   | 2  |
| (C) Optimization of the conditions for the asymmetric MPV reaction of other ketones..... | 8  |
| (D) Methods for the preparation of $\alpha$ -keto esters. ....                           | 10 |
| (E) Typical procedure for the asymmetric MPV reaction .....                              | 11 |
| (F) Gram-scale experiment.....                                                           | 12 |
| (G) Kinetic information.....                                                             | 12 |
| (H) HRMS data of the reaction. ....                                                      | 18 |
| (I) Spectral characterization data and HPLC conditions for the products .....            | 20 |
| (J) Spectral characterization data and HPLC conditions for the alkyl products.....       | 37 |
| (K) Copies of NMR spectra for catalysts and products.....                                | 40 |
| (L) References .....                                                                     | 81 |

## (A) General information

Reactions were carried out using commercial available reagents in oven-dried apparatus.  $\text{CHCl}_3$  and *iso*-propanol were dried and distilled from calcium hydride under nitrogen just before use. Molecular sieves were dried at 500 °C for 4 h and restored in nitrogen before use.  $^1\text{H}$  NMR spectra were recorded at 400 MHz. The chemical shifts were recorded in ppm relative to tetramethylsilane and with the solvent resonance as the internal standard. Data were reported as follows: chemical shift, multiplicity (s = singlet, d = doublet, t = triplet, m = multiplet), coupling constants (Hz) and integration.  $^{13}\text{C}$  NMR data were collected at 100 MHz with complete proton decoupling. Chemical shifts were reported in ppm from the tetramethylsilane with the solvent resonance as internal standard. Enantiomeric excesses (ee) were determined by chiral HPLC analysis on Daicel Chiralcel IA/IC/AD-H/AS-H/OD-H and Phenomenex Lux 5u Cellulose-2 in comparison with the authentic racemates. Optical rotations were reported as follows:  $[\alpha]_{\text{D}}^{\text{T}} = (\text{c: g}/100 \text{ mL, in solvent})$ . ESI-HRMS spectra were recorded on a commercial apparatus and methanol or acetonitrile was used to dissolve the sample. The *N,N'*-dioxides were prepared according to the methods reported in the literature.<sup>[1]</sup>

## (B) Optimization of the conditions for the asymmetric MPV reaction of glyoxylates

Table S1: Screening of the secondary alcohols

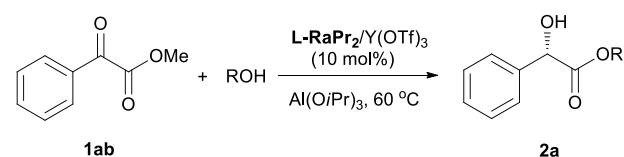

| Entry <sup>a</sup> | ROH | t (h) | Yield <sup>b</sup> (%) | ee <sup>c</sup> (%) |
|--------------------|-----|-------|------------------------|---------------------|
| 1                  |     | 48    | 0                      | -                   |
| 2                  |     | 48    | 0                      | -                   |

|   |                                                                                   |    |   |   |
|---|-----------------------------------------------------------------------------------|----|---|---|
| 4 |  | 48 | 0 | - |
| 5 |  | 48 | 0 | - |

<sup>a</sup>Unless otherwise noted, the reactions were performed with **L-RaPr**<sub>2</sub>/Y(OTf)<sub>3</sub> (1:1, 10 mol%), **1a** (0.1 mmol), Al(O*i*Pr)<sub>3</sub> (0.05 mmol) in ROH (0.1 M) at 60 °C for 3 h without extrusion of air. <sup>b</sup>Yields of the isolated products. <sup>c</sup>Determined by HPLC analysis using a chiral stationary phase.

**Table S2: Screening of the reaction temperature**

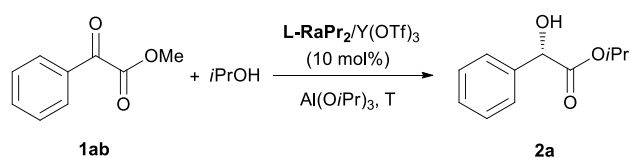

| Entry <sup>a</sup> | T (°C) | t (h) | Yield <sup>b</sup> (%) | ee <sup>c</sup> (%) |
|--------------------|--------|-------|------------------------|---------------------|
| 1                  | 60     | 3     | 99                     | 63                  |
| 2                  | 50     | 3     | 99                     | 69                  |
| 3                  | 40     | 5     | 99                     | 71                  |
| 4                  | 30     | 24    | 99                     | 73                  |
| 5 <sup>d</sup>     | 30     | 24    | 99                     | 75                  |
| 6 <sup>d</sup>     | 0      | 24    | n.r.                   | -                   |

<sup>a</sup>Unless otherwise noted, the reactions were performed with **L-RaPr**<sub>2</sub>/Y(OTf)<sub>3</sub> (1:1, 10 mol%), **1a** (0.1 mmol), Al(O*i*Pr)<sub>3</sub> (0.05 mmol) in *i*PrOH (0.1 M) without extrusion of air. <sup>b</sup> Yields of the isolated products. <sup>c</sup> Determined by HPLC analysis using a chiral stationary phase. <sup>d</sup>**L-RaPr**<sub>3</sub>/Y(OTf)<sub>3</sub> was used as catalyst.

**Table S3: Screening of the additives**

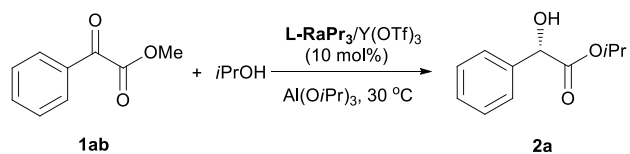

| Entry <sup>a</sup> | Additive                        | t (h) | Yield(%) <sup>b</sup> | ee(%) <sup>c</sup> |
|--------------------|---------------------------------|-------|-----------------------|--------------------|
| 1                  | LiNTf                           | 12    | 69                    | 72                 |
| 2 <sup>d</sup>     | 3 Å MS                          | 12    | 99                    | 71                 |
| 3 <sup>e</sup>     | 4 Å MS                          | 12    | 99                    | 71                 |
| 4                  | Na <sub>2</sub> SO <sub>4</sub> | 12    | 54                    | 67                 |
| 5                  | TsOH                            | 12    | trace                 | -                  |
| 6                  | m-CPBA                          | 12    | trace                 | -                  |
| 7                  | TEMPO                           | 12    | 74                    | 69                 |
| 8                  | DMAP                            | 12    | 46                    | 67                 |
| 9                  | KHSO <sub>4</sub>               | 12    | 34                    | 72                 |
| 10                 | NH <sub>4</sub> Cl              | 12    | 26                    | 26                 |
| 11                 | K <sub>2</sub> CO <sub>3</sub>  | 12    | 46                    | 71                 |
| 12                 | LiOH•H <sub>2</sub> O           | 12    | 32                    | 73                 |
| 13                 | -                               | 12    | 49                    | 72                 |

<sup>a</sup>Unless otherwise noted, the reactions were performed with **L-RaPr**<sub>3</sub>/Y(OTf)<sub>3</sub> (1:1, 10 mol%), **1b** (0.1 mmol), Al(O*i*Pr)<sub>3</sub> (0.05 mmol) and additive (0.1 mmol) in *i*PrOH (0.1 M) at 30 °C for 12 h without extrusion of air. <sup>b</sup>Yields of the isolated products.

<sup>c</sup>Determined by HPLC analysis using a chiral stationary phase. <sup>d</sup>3 Å MS (25 mg) were added. <sup>e</sup>4 Å MS (25 mg) were added.

**Table S4: Screening of the ester group on the substrates**

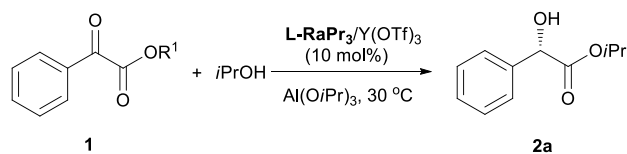

| Entry <sup>a</sup> | R <sup>1</sup>             | t (h) | Yield(%) <sup>b</sup> | ee(%) <sup>c</sup> |
|--------------------|----------------------------|-------|-----------------------|--------------------|
| 1                  | Me ( <b>1ab</b> )          | 12    | 49                    | 72                 |
| 2                  | <i>i</i> Pr ( <b>1a</b> )  | 4     | 99                    | 73                 |
| 3                  | <i>t</i> Bu ( <b>1ac</b> ) | 14    | 99                    | 73                 |

|                |                           |    |    |    |
|----------------|---------------------------|----|----|----|
| 4              | Bn ( <b>1ad</b> )         | 24 | 99 | 71 |
| 5 <sup>d</sup> | <i>i</i> Pr ( <b>1a</b> ) | 12 | 85 | 79 |
| 6 <sup>e</sup> | <i>i</i> Pr ( <b>1a</b> ) | 24 | 78 | 86 |

<sup>a</sup>Unless otherwise noted, the reactions were performed with **L-RaPr**<sub>3</sub>/Y(OTf)<sub>3</sub> (1:1, 10 mol%), **1** (0.1 mmol), Al(O*i*Pr)<sub>3</sub> (0.05 mmol), 3 Å MS (25 mg) in *i*PrOH (0.1 M) at 30 °C without extrusion of air. <sup>b</sup> Yields of the isolated products. <sup>c</sup> Determined by HPLC analysis using a chiral stationary phase. <sup>d</sup>Performed at 0 °C. <sup>e</sup>Performed at -10 °C.

**Table S5: Screening of the solvent**

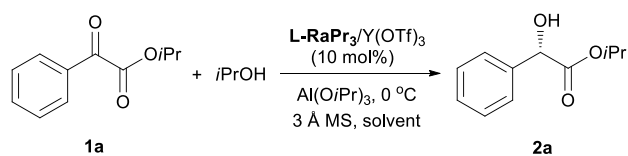

| Entry <sup>a</sup> | solvent                              | solvent volume,<br><i>i</i> PrOH:solvent ratio | t (h) | Yield(%) <sup>b</sup> | ee(%) <sup>c</sup> |
|--------------------|--------------------------------------|------------------------------------------------|-------|-----------------------|--------------------|
| 1                  | DCM                                  | 1.0 mL, 1:3                                    | 12    | 82                    | 84                 |
| 2                  | CHCl <sub>3</sub>                    | 1.0 mL, 1:3                                    | 12    | 70                    | 86                 |
| 3                  | DCE                                  | 1.0 mL, 1:3                                    | 12    | 75                    | 80                 |
| 4                  | CHCl <sub>2</sub> -CHCl <sub>2</sub> | 1.0 mL, 1:3                                    | 12    | 80                    | 81                 |
| 5                  | CH <sub>3</sub> -CCl <sub>3</sub>    | 1.0 mL, 1:3                                    | 12    | 69                    | 80                 |
| 6                  | CH <sub>2</sub> Cl-CHCl <sub>2</sub> | 1.0 mL, 1:3                                    | 12    | 85                    | 83                 |
| 7                  | toluene                              | 1.0 mL, 1:3                                    | 12    | 73                    | 82                 |
| 8                  | CHCl <sub>3</sub>                    | 1 mL, 5:1                                      | 24    | 99                    | 85                 |
| 9                  | CHCl <sub>3</sub>                    | 1 mL, 3:1                                      | 24    | 99                    | 85                 |
| 10                 | CHCl <sub>3</sub>                    | 1 mL, 1:1                                      | 24    | 97                    | 86                 |
| 11                 | CHCl <sub>3</sub>                    | 1 mL, 1:2                                      | 24    | 93                    | 87                 |
| 12                 | CHCl <sub>3</sub>                    | 1 mL, 1:3                                      | 24    | 90                    | 87                 |
| 13                 | CHCl <sub>3</sub>                    | 1 mL, 1:5                                      | 24    | 84                    | 87                 |

<sup>a</sup>Unless otherwise noted, the reactions were performed with **L-RaPr**<sub>3</sub>/Y(OTf)<sub>3</sub> (1:1, 10 mol%), **1** (0.1 mmol), Al(O*i*Pr)<sub>3</sub> (0.05

mmol), 3 Å MS (25 mg) in *i*PrOH/CHCl<sub>3</sub> (v/v = 1/2, 0.1 M) at 0 °C for 12 h without extrusion of air. <sup>b</sup>Yields of the isolated products. <sup>c</sup>Determined by HPLC analysis using a chiral stationary phase.

**Table S6: Screening of the amount of additives**

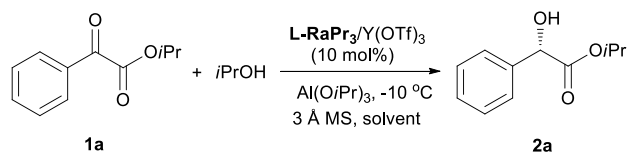

| Entry <sup>a</sup> | 3 Å MS (mg) | Al(O <i>i</i> Pr) <sub>3</sub> (mmol) | t (h) | Yield(%) <sup>b</sup> | ee(%) <sup>c</sup> |
|--------------------|-------------|---------------------------------------|-------|-----------------------|--------------------|
| 1                  | 25          | 0.1                                   | 24    | 82                    | 86                 |
| 2                  | 25          | 0.05                                  | 24    | 78                    | 86                 |
| 3                  | 25          | 0.02                                  | 24    | 70                    | 86                 |
| 4                  | 25          | 0.01                                  | 24    | 64                    | 86                 |
| 5                  | 100         | 0.1                                   | 24    | 71                    | 84                 |
| 6                  | 50          | 0.1                                   | 24    | 67                    | 84                 |
| 7                  | 10          | 0.1                                   | 24    | 72                    | 85                 |
| 8                  | 5           | 0.1                                   | 24    | 68                    | 86                 |

<sup>a</sup>Unless otherwise noted, the reactions were performed with **L-RaPr<sub>3</sub>/Y(OTf)<sub>3</sub>** (1:1, 10 mol%), **1** (0.1 mmol), Al(O*i*Pr)<sub>3</sub>, 3 Å MS in *i*PrOH and solvent at 0 °C for 12 h without extrusion of air. <sup>b</sup>Yields of the isolated products. <sup>c</sup>Determined by HPLC analysis using a chiral stationary phase.

**Table S7: Screening of the aluminium alkoxides**

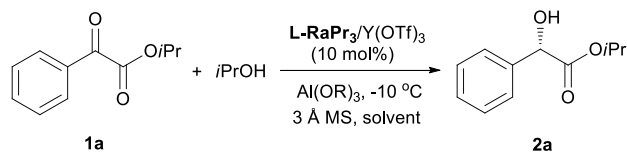

| Entry <sup>a</sup> | Al(OR) <sub>3</sub>            | t (h) | Yield(%) <sup>b</sup> | ee(%) <sup>c</sup> |
|--------------------|--------------------------------|-------|-----------------------|--------------------|
| 1                  | Al(OEt) <sub>3</sub>           | 24    | 77                    | 85                 |
| 2                  | Al(O <i>i</i> Pr) <sub>3</sub> | 24    | 78                    | 86                 |

|   |                                |    |    |    |
|---|--------------------------------|----|----|----|
| 3 | Al(O <i>t</i> Bu) <sub>3</sub> | 24 | 79 | 91 |
|---|--------------------------------|----|----|----|

<sup>a</sup>Unless otherwise noted, the reactions were performed with **L-RaPr**<sub>3</sub>/Y(OTf)<sub>3</sub> (1:1, 10 mol%), **1** (0.1 mmol), Al(O*i*Pr)<sub>3</sub> (0.05 mmol), 3 Å MS (25 mg) in *i*PrOH and solvent at 0 °C for 12 h without extrusion of air. <sup>b</sup>Yields of the isolated products.

<sup>c</sup>Determined by HPLC analysis using a chiral stationary phase.

**Table S8: Probing of the effect of the additives.**

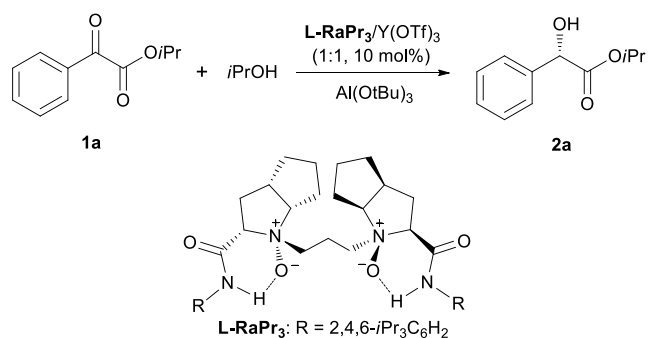

| Entry <sup>a</sup> | T (°C) | t (h) | Additive                               | Yield <sup>b</sup> (%) | Ee <sup>c</sup> (%) |
|--------------------|--------|-------|----------------------------------------|------------------------|---------------------|
| 1                  | 30     | 24    | -                                      | trace                  | n.d.                |
| 2                  | 30     | 24    | 3 Å MS                                 | 82                     | 73                  |
| 3                  | 30     | 14    | Al(O <i>t</i> Bu) <sub>3</sub>         | 99                     | 73                  |
| 4                  | 30     | 3     | 3 Å MS, Al(O <i>t</i> Bu) <sub>3</sub> | 99                     | 73                  |
| 5                  | 0      | 24    | -                                      | n.r.                   | -                   |
| 6                  | 0      | 24    | 3 Å MS                                 | n.r.                   | -                   |
| 7                  | 0      | 24    | Al(O <i>t</i> Bu) <sub>3</sub>         | n.r.                   | -                   |
| 8                  | 0      | 24    | 3 Å MS, Al(O <i>t</i> Bu) <sub>3</sub> | 99                     | 87                  |

<sup>a</sup>Unless otherwise noticed, the reactions were performed with **L-RaPr**<sub>3</sub>-Metal (1:1, 10 mol%), **1a** (0.10 mmol) and 3 Å MS (25 mg) in *i*PrOH/CHCl<sub>3</sub> (v/v = 1/2, 0.1 M) in air. <sup>b</sup>Yields of the isolated products. <sup>c</sup>Determined by HPLC analysis using a chiral stationary phase.

**(C) Optimization of the conditions for the asymmetric MPV reaction of other ketones.**

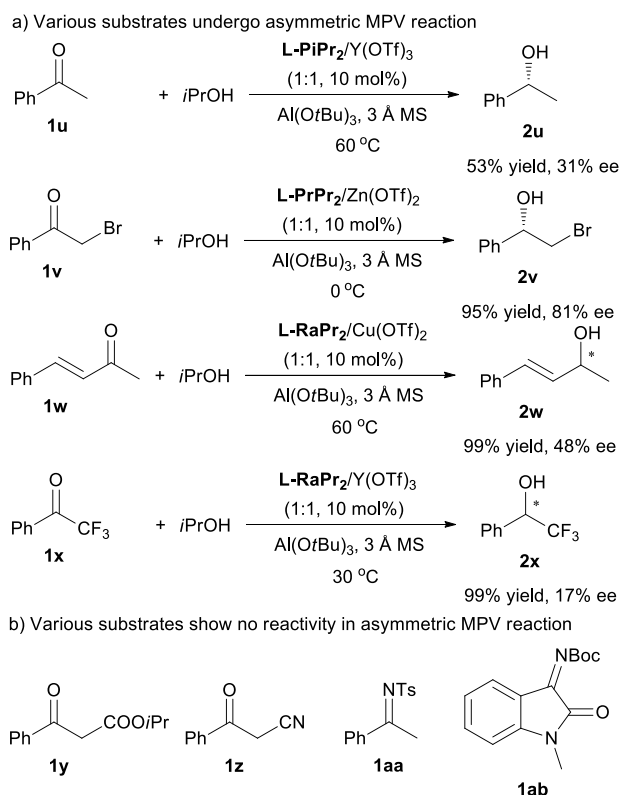

With the success in the reduction of glyoxylates, we were encouraged to apply such method to a variety of substrates. After a serious of condition screening, we established the MPV reaction of  $\alpha$ -bromoacetophenone **1v** with *iso*-propanolin the presence of 3 Å MS and Al(O*i*Pr)<sub>3</sub> by employing **L-PrPr<sub>2</sub>/Zn(OTf)<sub>2</sub>** complex as the catalyst at 0 °C for 120 h, and obtained 95% yield and 81% ee (Scheme 3). Other types of substrates were also under investigation. Simple ketones such as **1u** and **1w** had low reaction reactivity and often require high reaction temperature. The 2,2,2-trifluoacetophenone (**1x**) gave a higher reactivity as the trifluomethyl group serves as a efficient electrodrawing group. However, the stereo control was not satisfying after a serious of screening. For substrates **1y** and **1z**, which more inclined to form an enol, the MPV reduction is reluctant, either stablized via a hydrogen bond (**1y**), or a conjugating effect (**1z**). Enlightened by previous work,<sup>10e</sup> we also expanded substrate scope to ketimines **1aa** and **1ab**, yet no desired product was formed. Such facts portrayed the property of chemical specificity towards carbonyl groups in the MPV reaction, and enols or imines were nonreactive.



**Table S9: Screening of the metal salts**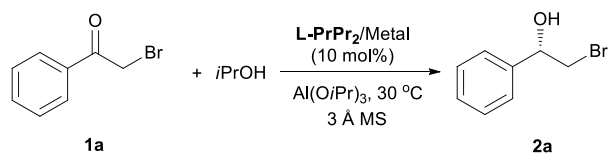

| Entry <sup>a</sup> | Metal                              | t (h) | Yield(%) <sup>b</sup> | ee(%) <sup>c</sup> |
|--------------------|------------------------------------|-------|-----------------------|--------------------|
| 1                  | Sc(OTf) <sub>3</sub>               | 24    | 99                    | 61                 |
| 2                  | Y(OTf) <sub>3</sub>                | 24    | 99                    | 67                 |
| 3                  | La(OTf) <sub>3</sub>               | 24    | 0                     | -                  |
| 4                  | Yb(OTf) <sub>3</sub>               | 48    | 99                    | 58                 |
| 5                  | Zn(OTf) <sub>2</sub>               | 24    | 99                    | 73                 |
| 6                  | Ba(OTf) <sub>2</sub>               | 24    | 99                    | 71                 |
| 7                  | Zn(NTf) <sub>2</sub>               | 72    | 0                     | -                  |
| 8                  | Zn(ClO <sub>4</sub> ) <sub>2</sub> | 72    | 0                     | -                  |
| 9                  | Zn(BF <sub>4</sub> ) <sub>2</sub>  | 72    | 0                     | -                  |
| 10                 | ZnBr <sub>2</sub>                  | 72    | 0                     | -                  |

<sup>a</sup>Unless otherwise noted, the reactions were performed with **L-PrPr**<sub>2</sub>-metal (1:1, 10 mol%), **1** (0.1 mmol),  $\text{Al}(\text{O}i\text{Pr})_3$  (0.1 mmol),  $3\text{ \AA MS}$  (25 mg) in  $i\text{PrOH}$  and solvent at  $30\text{ }^\circ\text{C}$  without extrusion of air. <sup>b</sup>Yields of the isolated products. <sup>c</sup>Determined by HPLC analysis using a chiral stationary phase.

**Table S10: Screening of the ligands**

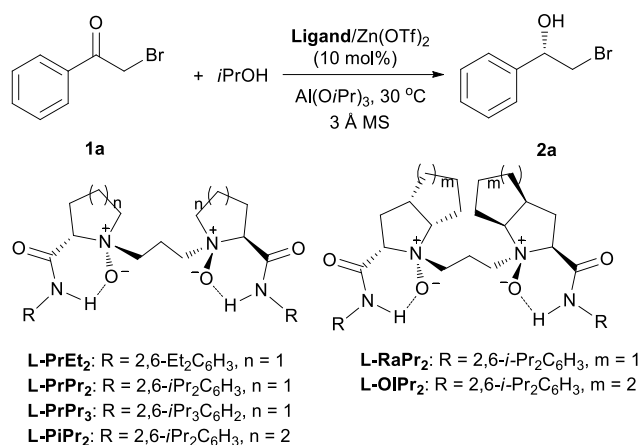

| Entry <sup>a</sup> | Metal                | t (h) | Yield <sup>b</sup> (%) | ee <sup>c</sup> (%) |
|--------------------|----------------------|-------|------------------------|---------------------|
| 1                  | L-PrEt <sub>2</sub>  | 24    | trace                  | 50                  |
| 2                  | L-PrPr <sub>2</sub>  | 24    | 99                     | 73                  |
| 3                  | L- PrPr <sub>3</sub> | 24    | 99                     | 64                  |
| 4                  | L-PiPr <sub>2</sub>  | 24    | 99                     | 69                  |
| 5                  | L- RaPr <sub>2</sub> | 24    | 99                     | 43                  |
| 6 <sup>d</sup>     | L-PrPr <sub>2</sub>  | 120   | 90                     | 80                  |
| 7 <sup>d,e</sup>   | L-PrPr <sub>2</sub>  | 120   | 95                     | 81                  |

<sup>a</sup>Unless otherwise noted, the reactions were performed with L-Zn(OTf)<sub>2</sub> (1:1, 10 mol%), **1** (0.1 mmol), Al(O*i*Pr)<sub>3</sub> (0.1 mmol), 3 Å MS (25 mg) in *i*PrOH at 30 °C without extrusion of air. <sup>b</sup>Yields of the isolated products. <sup>c</sup>Determined by HPLC analysis using a chiral stationary phase. <sup>d</sup>The reaction proceed at 0 °C. <sup>e</sup>Al(O*t*Bu)<sub>3</sub> (0.1 mmol) were used instead of Al(O*i*Pr)<sub>3</sub>.

#### (D) Methods for the preparation of $\alpha$ -keto esters.

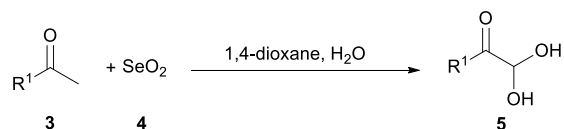

Glyoxal monohydrides **5a–5u** were prepared according to the methods reported in the literature.<sup>[2]</sup> Into a dry flask were added SeO<sub>2</sub> **4** (11 mmol), 2,6-dioxane (7.5 mL) and H<sub>2</sub>O (0.6 mL) and the reaction mixture was stirred at 50 °C until **4** dissolve

completely. Then acetyl compound **3** (10 mmol) was added and the reaction mixture was stirred at 100 °C. The reaction was monitored under TLC.

The reaction mixture was filtered through a pad of celite and the solvent was removed under reduced pressure. Purification was accomplished by flash column chromatography and recrystallization with water, and a white to pale yellow solid **5** was obtained.

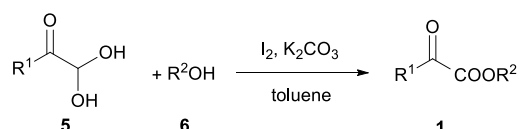

$\alpha$ -Keto esters **1a–1u**, **1ab**, **1ac** and **1ad** were prepared according to the methods reported in the literature.<sup>[3]</sup> Into a dry flask were added **5** (5 mmol), toluene (10 mL) and **6** (7.5 mmol) and the reaction mixture was stirred room temperature until **5** dissolve completely. Then I<sub>2</sub> (5 mmol) and K<sub>2</sub>CO<sub>3</sub> (10 mmol) were added to the reaction mixture and the reaction was monitored under TLC.

The reaction mixture was washed with aqueous Na<sub>2</sub>SO<sub>3</sub> solution and the solvent was removed under reduced pressure. Purification was accomplished by flash column chromatography and distillation, and a colorless to pale yellow liquid **1** was obtained.

### (E) Typical procedure for the asymmetric MPV reaction

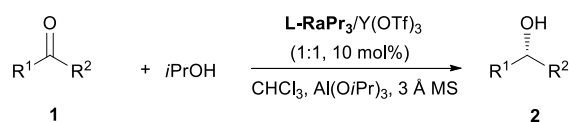

Chiral *N,N'*-dioxide **L-RaPr<sub>3</sub>** (10 mol%), Y(OTf)<sub>3</sub> (10 mol%), 3 Å MS (25 mg), and Al(*O*tBu)<sub>3</sub> (50 mol%) were added in a dry reaction tube, then *i*PrOH/CHCl<sub>3</sub> (v/v = 1/2, 1 mL) was added in air. The mixture was stirred at 30°C for 30 min. Then, **1** (0.1 mmol) were added. The reaction was stirred vigorously at -10°C for 72 h and at 0 °C for 48 h. The mixture was purified by column chromatography on silica gel to afford the desired product **2**. The yields of **2** were calculated according to the amount of **1**.

## (F) Gram-scale experiment

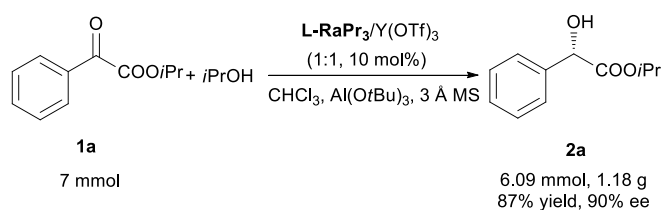

Chiral *N,N'*-dioxide **L-RaPr<sub>3</sub>** (10 mol%), Y(OTf)<sub>3</sub> (10 mol%), 3 Å MS (1.750 g), and Al(*O*tBu)<sub>3</sub> (50 mol%) were added in a dry reaction vessel, then *i*PrOH/CHCl<sub>3</sub> (v/v = 1/2, 70 mL) was added in air. The mixture was stirred at 30 °C for 30 min. Then, **1a** (0.1 mmol) were added. The reaction was stirred vigorously at -10 °C for 72 h and at 0 °C for 48 h. The mixture was purified by column chromatography on silica gel to afford the desired product **2a**. The yield of **2a** was calculated according to the amount of **1a**.

## (G) Kinetic information.

### 1. General procedures.

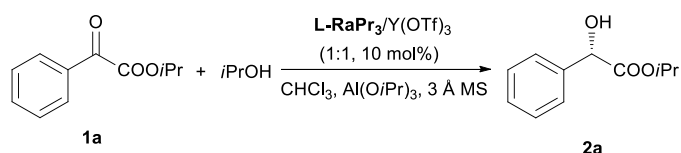

Chiral *N,N'*-dioxide **L-RaPr<sub>3</sub>** (10 mol%), Y(OTf)<sub>3</sub> (10 mol%), 3 Å MS (25 mg), and Al(*O*tBu)<sub>3</sub> (50 mol%) were added in a dry reaction tube, then *i*PrOH/CHCl<sub>3</sub> (1 mL) was added in air. The mixture was stirred at 20°C for 30 min. Then, **1a** (0.1 mmol) were added. The reaction was stirred vigorously at 20 °C minor portion (approx. 20 μL) of the reaction mixture at certain reaction time. Each portion of the mixture was filtered through a pad of celite. After removal of solvent, the residue was analyzed via HPLC.

In the HPLC, the amount of substance *N* is proportional to the chromatographic peak area.

$$N_i = f_i A_i.$$

In the equation,  $A_i$  refers to chromatographic peak area of the substance,  $f_i$  refers to the correction factors of peak area. For **1a** and **2a**, it is deduced that,

$$f_{2a}/f_{1a} = (N_{2a}A_{1a}) / (N_{1a}A_{2a}).$$

In order to obtain  $f_{1a}/f_{2a}$ , a series of mixture of **1a** and **2a** were analyzed.

| Entry | $N_{2a} / N_{1a}$ | $A_{1a} / A_{2a}$ | $f_{2a} / f_{1a}$ |
|-------|-------------------|-------------------|-------------------|
| 1     | 0.01              | 276.7             | 2.77              |
| 2     | 0.03              | 88.29             | 2.65              |
| 3     | 0.05              | 54.87             | 2.74              |
| 4     | 0.1               | 26.32             | 2.63              |
| 5     | 0.15              | 18.88             | 2.83              |
| 6     | 0.2               | 13.16             | 2.63              |
| 7     | 0.25              | 10.20             | 2.55              |
| 8     | 0.3               | 8.49              | 2.55              |
| 9     | 0.4               | 6.45              | 2.58              |
| 10    | 0.6               | 4.37              | 2.62              |
| 11    | 0.8               | 3.34              | 2.68              |
|       |                   |                   | 2.66 <sup>a</sup> |

<sup>a</sup>Average of entry 1 to entry 11.

It is estimated that the  $f_{1a}/f_{2a}$  for **1a** and **2a** is 2.66. As a result, the HPLC analysis of portion of the reaction mixture at certain reaction time would give out the mole ratio of **1a** and **2a**, thus the yield of **2a** at certain reaction time can be calculated. The set of experiment was implemented under given alcohol concentration.

For  $t = 0.5(t_i + t_{i+1})$ , the reaction rate  $r$  of **1a** was estimated using an approximate formula,

$$r = (c_i - c_{i+1}) / (t_{i+1} - t_i) \quad .$$

## 2. Data collection.

Solvent: *i*PrOH/CHCl<sub>3</sub> (v/v = 1/5, 1 mL)

| Entry | t (min) | $A_{1d}/A_{2a}$ | Ee of <b>2a</b> | Yield of <b>2a</b><br>(%) |
|-------|---------|-----------------|-----------------|---------------------------|
| 1     | 0       | -               | -               | 0                         |
| 2     | 1       | 22.04           | 82              | 10.8                      |
| 3     | 2       | 12.83           | 82              | 17.2                      |
| 4     | 3       | 10.00           | 82              | 21.0                      |
| 5     | 4       | 8.35            | 82              | 24.2                      |
| 6     | 5       | 7.24            | 82              | 26.9                      |

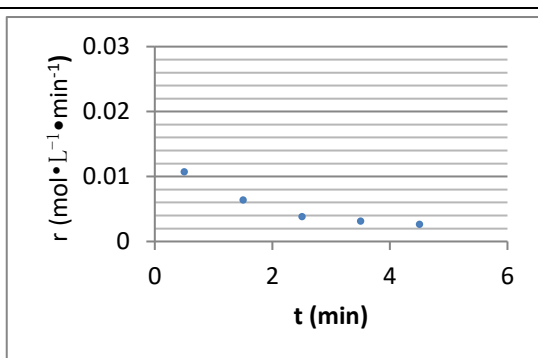

Solvent: *i*PrOH/CHCl<sub>3</sub> (v/v = 1/2, 1 mL)

| Entry | t (min) | $A_{1d}/A_{2a}$ | Ee of <b>2a</b> | Yield of <b>2a</b><br>(%) |
|-------|---------|-----------------|-----------------|---------------------------|
| 1     | 0       | -               | -               | 0                         |
| 2     | 1       | 13.86           | 82              | 16.1                      |
| 3     | 2       | 8.53            | 82              | 23.8                      |
| 4     | 3       | 6.87            | 81              | 27.9                      |
| 5     | 4       | 5.73            | 82              | 31.7                      |
| 6     | 5       | 4.98            | 83              | 34.8                      |

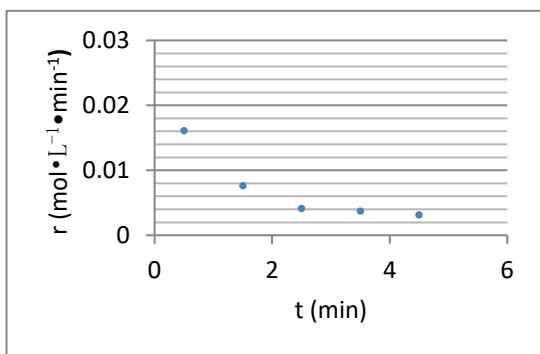

Solvent: *i*PrOH/CHCl<sub>3</sub> (v/v = 1/1, 1 mL)

| Entry | t (min) | $A_{1a}/A_{2a}$ | Ee of <b>2a</b> | Yield of <b>2a</b><br>(%) |
|-------|---------|-----------------|-----------------|---------------------------|
| 1     | 0       | -               | -               | 0                         |
| 2     | 1       | 10.96           | 82              | 19.5                      |
| 3     | 2       | 6.76            | 82              | 28.3                      |
| 4     | 3       | 5.25            | 82              | 33.6                      |
| 5     | 4       | 4.33            | 82              | 38.0                      |
| 6     | 5       | 3.71            | 82              | 41.8                      |

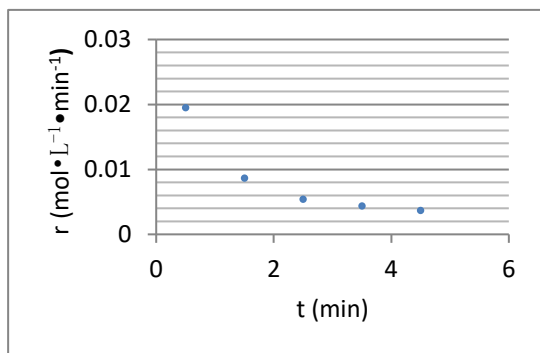

Solvent: *i*PrOH (1 mL)

| Entry | t (min) | $A_{1a}/A_{2a}$ | Ee of <b>2a</b> | Yield of <b>2a</b><br>(%) |
|-------|---------|-----------------|-----------------|---------------------------|
|-------|---------|-----------------|-----------------|---------------------------|

|   |   |       |    |      |
|---|---|-------|----|------|
| 1 | 0 | -     | -  | 0    |
| 2 | 1 | 13.86 | 80 | 19.5 |
| 3 | 2 | 8.533 | 80 | 28.3 |
| 4 | 3 | 6.868 | 79 | 33.6 |
| 5 | 4 | 5.734 | 80 | 38.0 |
| 6 | 5 | 4.977 | 80 | 41.8 |

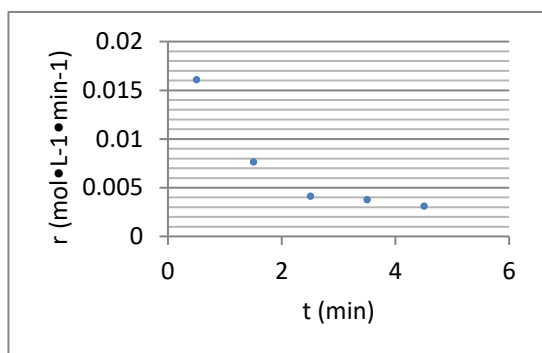

### 3. Data analyses and explanations.

As we can observed from charts and graphs above, the following can be concluded.

- 1) In every individual experiment, the ee value stayed unchanged at the first 5 min of the reaction. We believe consumption of **1a** or formation of optically active **2a** have no influence of the ee of the product **2a**.
- 2) For mixed reaction solvents, the reaction rate increased as the concentration of *i*PrOH increase. We calculated the reaction rate of *i*PrOH by using  $r_0$  at different *i*PrOH concentration. The reaction order of *i*PrOH is about 0.54.

| Entry | <i>i</i> PrOH/CHCl <sub>3</sub> | $c(i\text{PrOH})$<br>(mol·L <sup>-1</sup> ) | $r_0$<br>(mol·L <sup>-1</sup> ·min <sup>-1</sup> ) | ln(c) | ln( $r_0$ ) |
|-------|---------------------------------|---------------------------------------------|----------------------------------------------------|-------|-------------|
| 1     | 1/5                             | 2.18                                        | 0.0108                                             | 0.338 | -1.97       |
| 2     | 1/2                             | 4.36                                        | 0.0161                                             | 0.639 | -1.79       |
| 3     | 1/1                             | 6.54                                        | 0.0195                                             | 0.816 | -1.71       |



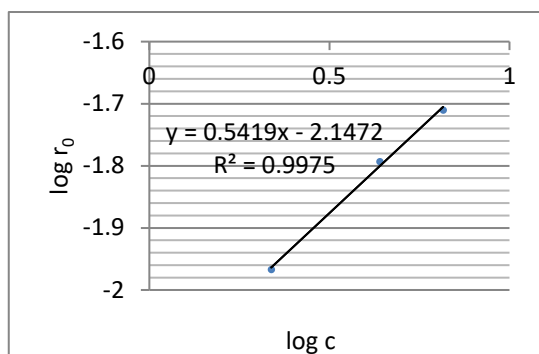

Further calculation did not elicit the reaction order of **1a** at different *i*PrOH concentrations. We assume that in such catalytic system, formula for elementary reaction is not feasible for **1a**.

- 3) When *i*PrOH was used as solvent the reaction rate at the first 5 min of was slightly slower than the mixed reaction solvent of *i*PrOH and chloroform (v/v = 1:1). Moreover, the ee value was lower than the mixed reaction solvent.
- 4) Such low reaction order of *i*PrOH and solvent effect suggested that it might be not *i*PrOH itself but the formed aluminium alkoxide that served as the true reactant, as proposed in the manuscript.

### (H) HRMS data of the reaction.

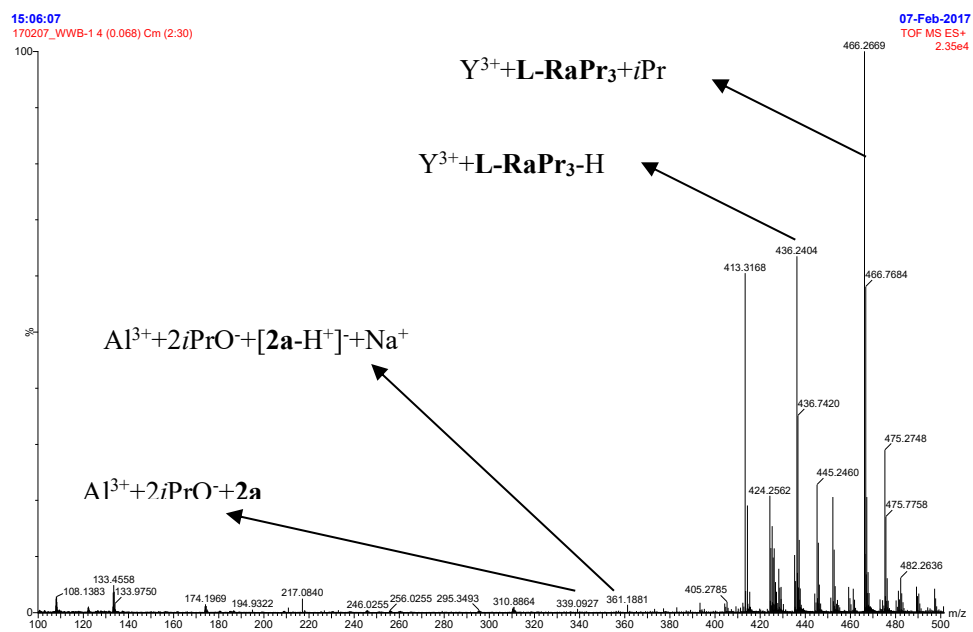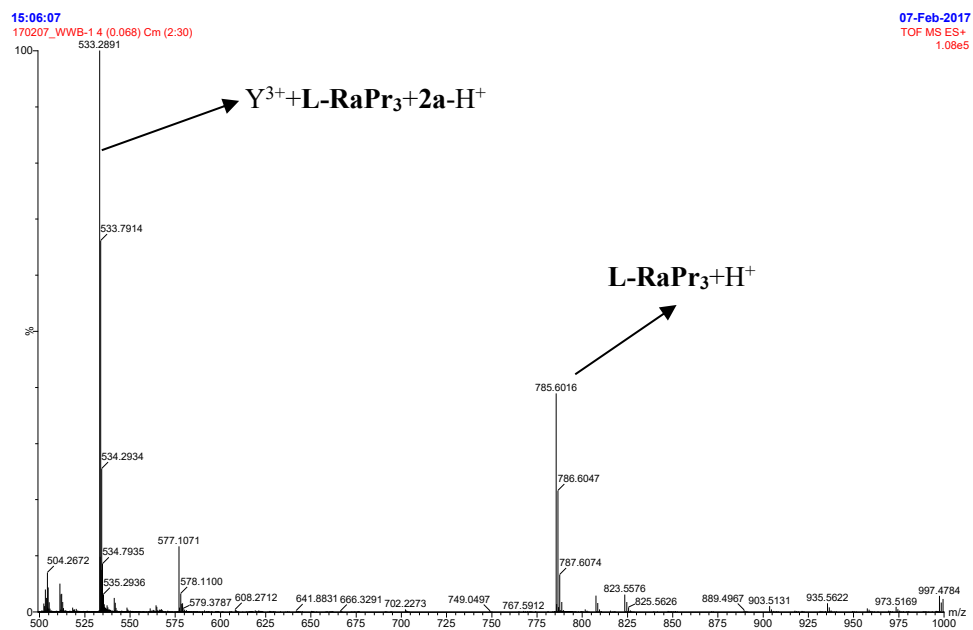

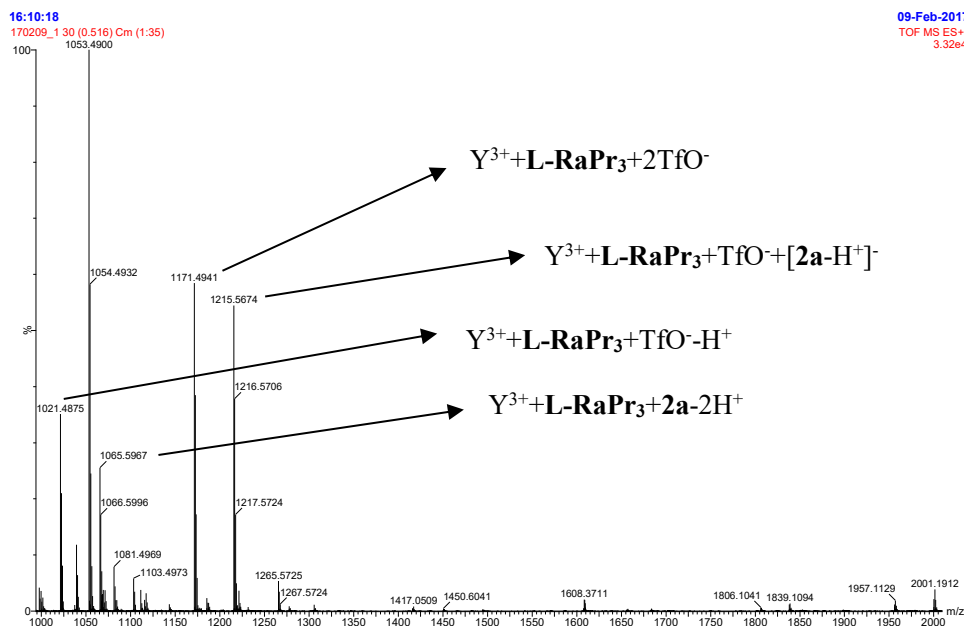

$Y(OTf)_3 + L-RaPr_3 + 1a + Al(OtBu)_3$  (0.1:0.1:1:0.5) :

$[Al^{3+}+2iPrO^-+2a]$  Calcd for : 339.1752, found : 339.0927;

$[Al^{3+}+2iPrO^-+[2a-H^+]^- + Na^+]$  Calcd for : 361.1572, found : 361.1881;

$[Y^{3+}+L-RaPr_3-H^+]$  Calcd for : 436.2424, found : 436.2404;

$[Y^{3+}+L-RaPr_3+iPrO^-]$  Calcd for : 466.2711, found : 466.2669;

$[Y^{3+}+L-RaPr_3+2a-H^+]$  Calcd for : 533.2895, found : 533.2891;

$[L-RaPr_3+H^+]$  Calcd for : 785.5945, found : 785.6016;

$[Y^{3+}+L-RaPr_3+TfO^-+[2a-H^+]^-]$  Calcd for : 1215.5310, found : 1215.5674;

$[Y^{3+}+L-RaPr_3+2TfO^-]$  Calcd for : 1171.3966, found : 1171.4941;

$[Y^{3+}+L-RaPr_3+2a-2H^+]$  Calcd for : 1065.5711, found : 1065.5967;

$[Y^{3+}+L-RaPr_3+TfO^-H^+]$  Calcd for : 1021.4875, found : 1021.4367.

The peak for species  $Al^{3+}+2iPrO^-+2a$ ,  $Y^{3+}+L-RaPr_3+iPrO^-$ ,  $Y^{3+}+L-RaPr_3+2a-H^+$  and  $Y^{3+}+L-RaPr_3+TfO^-+[2a-H^+]^-$  were found. The find of the peak of  $Al^{3+}+2iPrO^-+2a$  species allowed us to presume that aluminium alkoxide should have a direct influence in the forming of **2a**. Moreover, any form of  $Y^{3+}+L-RaPr_3+iPrO^-+2a$ , indicating *i*PrOH may serves as direct reductant in the catalytic cycle was not found.

## (I) Spectral characterization data and HPLC conditions for the products

### (S)-iso-propyl mandelate (2a)

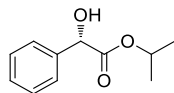

(**C<sub>12</sub>H<sub>16</sub>O<sub>3</sub>**) a white solid; 98% yield, 90% ee.  $[\alpha]_D^{20} = +100.81$  ( $c = 0.248$ , in  $\text{CHCl}_3$ ), {Lit.<sup>[4]</sup> $[\alpha]_D^{25} = -96.1$  ( $c = 1.15$ , in  $\text{CHCl}_3$ ), conf. (*R*)}. HPLC Phenomenex Lux 5u Cellulose-2, 2-propanol/*n*-hexane = 10/90, flow rate = 1.0 mL/min,  $\lambda = 210$  nm, retention time: 8.76 min, 9.92 min.  $^1\text{H NMR}$  (400 MHz,  $\text{CDCl}_3$ )  $\delta$  7.50 – 7.28 (m, 5H), 5.17 – 4.98 (m, 2H), 3.57 – 3.44 (m, 1H), 1.28 (d,  $J = 6.3$  Hz, 3H), 1.11 (d,  $J = 6.3$  Hz, 3H).  $^{13}\text{C NMR}$  (101 MHz,  $\text{CDCl}_3$ )  $\delta = 173.25, 138.56, 128.50, 128.30, 126.43, 72.89, 70.20, 21.72, 21.41$ . ESI-HRMS: calcd for  $\text{C}_{11}\text{H}_{14}\text{NaO}_3^+$   $[\text{M}+\text{Na}^+]$  217.0835, found 217.0833.

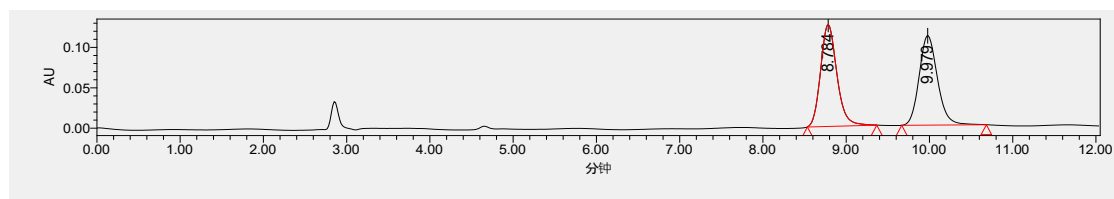

|   | Retention Time | %Area |
|---|----------------|-------|
| 1 | 8.784          | 50.31 |
| 2 | 9.979          | 49.69 |

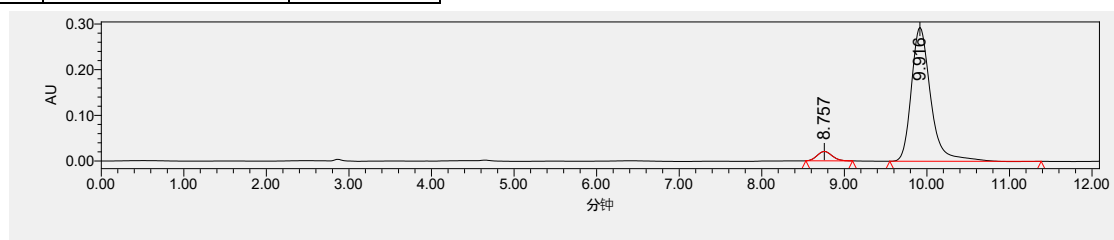

|   | Retention Time | %Area |
|---|----------------|-------|
| 1 | 8.757          | 5.14  |
| 2 | 9.916          | 94.86 |

**(S)-iso-propyl  $\alpha$ -hydroxy- $\alpha$ -(2-methylphenyl)acetate (2b)**

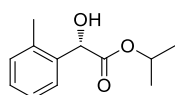

(C<sub>13</sub>H<sub>18</sub>O<sub>3</sub>) a colorless oil; 99% yield, 91% ee.  $[\alpha]_D^{21} = +117.86$  ( $c = 0.328$ , in CH<sub>2</sub>Cl<sub>2</sub>). HPLC Phenomenex Lux 5u Cellulose-2, 2-propanol/*n*-hexane = 5/95, flow rate = 1.0 mL/min,  $\lambda = 210$  nm, retention time: 13.04 min, 14.43 min. <sup>1</sup>H NMR (400 MHz, CDCl<sub>3</sub>)  $\delta$  7.29 – 7.00 (m, 4H), 5.25 (d,  $J = 5.3$  Hz, 1H), 5.00 (dt,  $J = 12.5, 6.3$  Hz, 1H), 3.39 (d,  $J = 5.3$  Hz, 1H), 2.36 (s, 3H), 1.19 (d,  $J = 6.3$  Hz, 3H), 1.03 (d,  $J = 6.2$  Hz, 3H). <sup>13</sup>C NMR (101 MHz, CDCl<sub>3</sub>)  $\delta = 172.71, 135.85, 135.33, 129.69, 127.25, 125.51, 125.15, 69.36, 69.08, 20.67, 20.39, 18.28$ . ESI-HRMS: calcd for C<sub>12</sub>H<sub>16</sub>NaO<sub>3</sub><sup>+</sup>  $[M+Na^+]$  231.0992, found 231.0992.

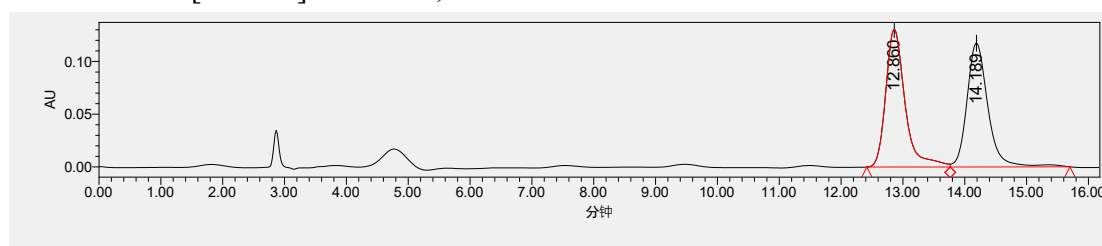

|   | Retention Time | %Area |
|---|----------------|-------|
| 1 | 12.860         | 50.25 |
| 2 | 14.189         | 49.75 |

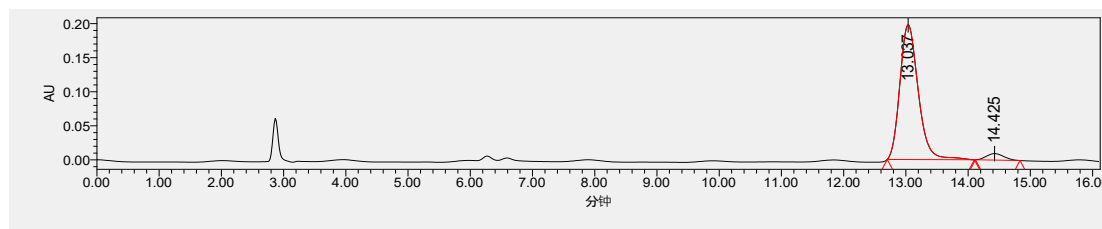

|   | Retention Time | %Area |
|---|----------------|-------|
| 1 | 13.037         | 95.62 |
| 2 | 14.425         | 4.38  |

**(S)-iso-propyl  $\alpha$ -hydroxy- $\alpha$ -(3-methylphenyl)acetate (2c)**

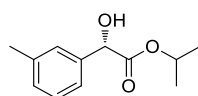

(**C<sub>13</sub>H<sub>18</sub>O<sub>3</sub>**) a colorless oil; 98% yield, 85% ee.  $[\alpha]_D^{21} = +78.67$  ( $c = 0.286$ , in  $\text{CH}_2\text{Cl}_2$ ). HPLC Phenomenex Lux 5u Cellulose-2, 2-propanol/*n*-hexane = 10/90, flow rate = 1.0 mL/min,  $\lambda = 210$  nm, retention time: 8.04 min, 9.06 min.  $^1\text{H}$  NMR (400 MHz,  $\text{CDCl}_3$ )  $\delta$  7.20 – 7.02 (m, 4H), 5.10 – 4.86 (m, 2H), 3.39 (d,  $J = 6.1$  Hz, 1H), 2.28 (s, 3H), 1.21 (d,  $J = 6.3$  Hz, 3H), 1.05 (d,  $J = 6.3$  Hz, 3H).  $^{13}\text{C}$  NMR (101 MHz,  $\text{CDCl}_3$ )  $\delta$  = 172.29, 137.43, 137.19, 128.03, 127.36, 126.02, 122.55, 71.89, 69.08, 20.69, 20.39. ESI-HRMS: calcd for **C<sub>12</sub>H<sub>16</sub>NaO<sub>3</sub><sup>+</sup>**  $[\text{M}+\text{Na}^+]$  231.0992, found 231.0997.

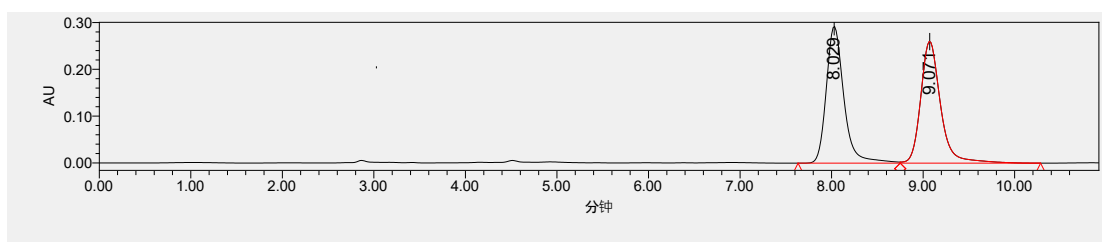

|   | Retention Time | %Area |
|---|----------------|-------|
| 1 | 8.029          | 49.84 |
| 2 | 9.071          | 50.16 |

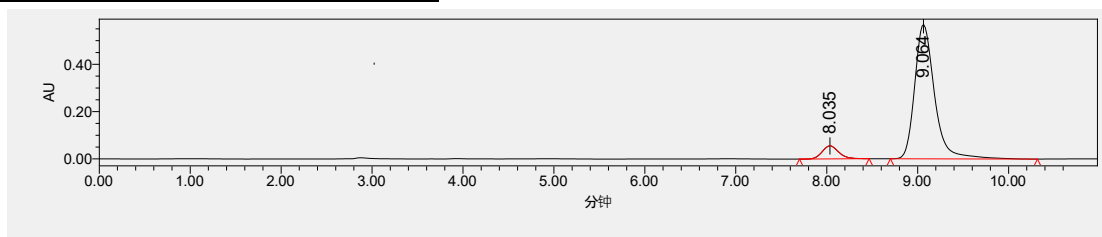

|   | Retention Time | %Area |
|---|----------------|-------|
| 1 | 8.035          | 7.50  |
| 2 | 9.064          | 92.50 |

**(*S*)-iso-propyl  $\alpha$ -hydroxy- $\alpha$ -(4-methylphenyl)acetate (2d)**

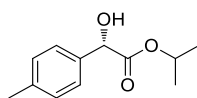

(**C<sub>13</sub>H<sub>18</sub>O<sub>3</sub>**) a white solid; 98% yield, 90% ee.  $[\alpha]_D^{23} = +92.31$  ( $c = 0.260$ , in  $\text{CH}_2\text{Cl}_2$ ). HPLC Phenomenex Lux 5u Cellulose-2, 2-propanol/*n*-hexane = 5/95, flow rate = 1.0 mL/min,  $\lambda = 210$  nm, retention time: 9.27 min, 9.90 min.  $^1\text{H}$  NMR (400 MHz,  $\text{CDCl}_3$ )  $\delta$  7.27 – 7.15 (m, 2H), 7.13 – 7.02 (m, 2H), 5.10 – 4.86 (m, 2H), 3.38 (d,  $J = 6.1$  Hz, 1H), 2.27 (s, 3H), 1.20 (d,  $J = 6.3$  Hz, 3H), 1.04 (d,  $J = 6.3$  Hz, 3H).  $^{13}\text{C}$  NMR (101 MHz,  $\text{CDCl}_3$ )  $\delta = 172.36, 137.01, 134.61, 128.17, 125.33, 71.72, 69.02, 20.68, 20.39, 20.14$ . ESI-HRMS: calcd for **C<sub>12</sub>H<sub>16</sub>NaO<sub>3</sub><sup>+</sup>**  $[\text{M}+\text{Na}^+]$  231.0992, found 231.1000.

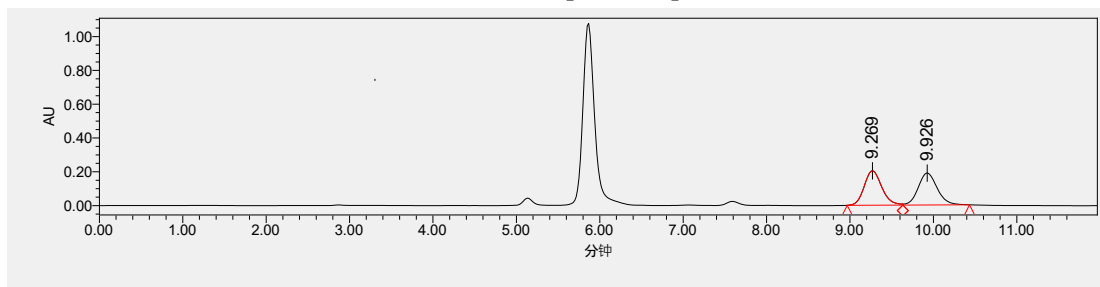

|   | Retention Time | %Area |
|---|----------------|-------|
| 1 | 9.269          | 49.90 |
| 2 | 9.926          | 50.10 |

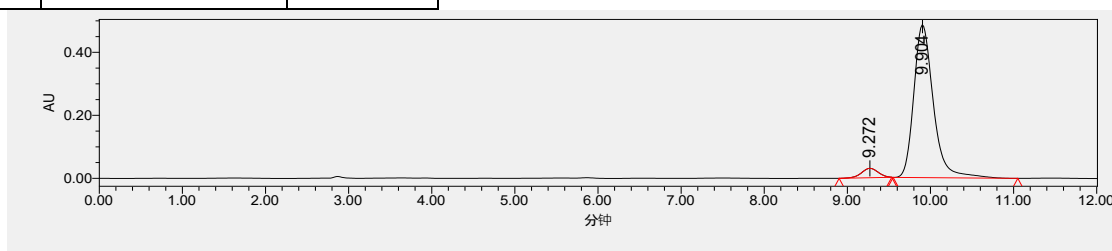

|   | Retention Time | %Area |
|---|----------------|-------|
| 1 | 9.272          | 4.96  |
| 2 | 9.904          | 95.04 |

**(S)-iso-propyl  $\alpha$ -hydroxy- $\alpha$ -(4-(*tert*-butyl)phenyl)acetate (2e)**

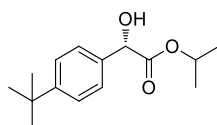

(**C<sub>16</sub>H<sub>24</sub>O<sub>3</sub>**) a white solid; 99% yield, 91% ee.  $[\alpha]_D^{12} = +71.93$  ( $c = 0.228$ , in  $\text{CH}_2\text{Cl}_2$ ). HPLC DAICEL CHIRALCEL IA, 2-propanol/*n*-hexane = 10/90, flow rate = 1.0 mL/min,  $\lambda = 210$  nm, retention time: 6.73 min, 7.84 min.  $^1\text{H}$  NMR (400 MHz,  $\text{CDCl}_3$ )

$\delta$  7.36 – 7.21 (m, 4H), 5.01 (dd,  $J = 12.5, 6.2$  Hz, 2H), 3.34 (d,  $J = 6.2$  Hz, 1H), 1.28 – 1.18 (m, 12H), 1.07 (d,  $J = 6.2$  Hz, 3H).  $^{13}\text{C}$  NMR (101 MHz,  $\text{CDCl}_3$ )  $\delta = 172.30, 150.22, 134.53, 125.07, 124.43, 71.67, 69.02, 33.54, 30.27, 20.71, 20.45$ . ESI-HRMS: calcd for  $\text{C}_{15}\text{H}_{22}\text{NaO}_3^+$  [ $\text{M}+\text{Na}^+$ ] 273.1467, found 273.1465.

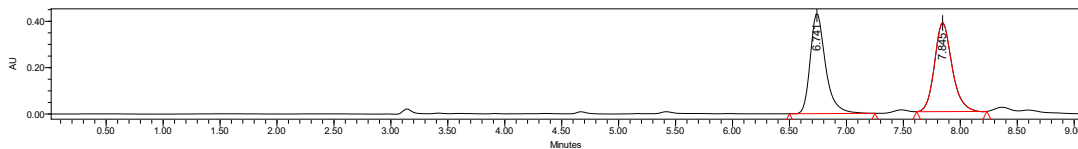

|   | Retention Time | %Area |
|---|----------------|-------|
| 1 | 6.741          | 49.58 |
| 2 | 7.845          | 50.42 |

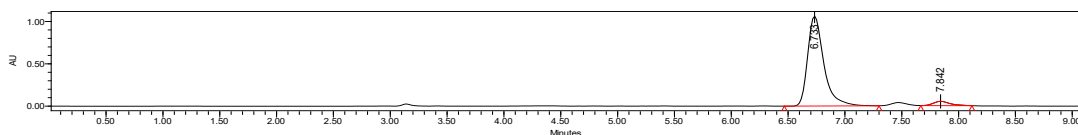

|   | Retention Time | %Area |
|---|----------------|-------|
| 1 | 6.733          | 95.34 |
| 2 | 7.842          | 4.66  |

### (*S*)-*iso*-propyl $\alpha$ -hydroxy- $\alpha$ -(4-phenylphenyl)acetate (**2f**)

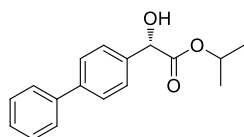

( $\text{C}_{17}\text{H}_{18}\text{O}_3$ ) a white solid; 99% yield, 89% ee.  $[\alpha]_{\text{D}}^{18} = +114.97$  ( $c = 0.294$ , in  $\text{CH}_2\text{Cl}_2$ ). HPLC DAICEL CHIRALCEL IA, 2-propanol/*n*-hexane = 10/90, flow rate = 1.0 mL/min,  $\lambda = 210$  nm, retention time: 9.14 min, 10.21 min.  $^1\text{H}$  NMR (400 MHz,  $\text{CDCl}_3$ )  $\delta$  7.55 – 7.49 (m, 4H), 7.44 – 7.33 (m, 4H), 7.27 (t,  $J = 7.3$  Hz, 1H), 5.09 (s, 2H), 5.01 (dt,  $J = 12.5, 6.3$  Hz, 1H), 3.47 (s, 1H), 1.22 (d,  $J = 6.3$  Hz, 3H), 1.06 (d,  $J = 6.3$  Hz, 3H).  $^{13}\text{C}$  NMR (101 MHz,  $\text{CDCl}_3$ )  $\delta = 173.03, 151.04, 135.93, 126.06, 125.39, 82.98, 72.83, 34.56, 31.33, 27.92$ .  $^{13}\text{C}$  NMR (101 MHz,  $\text{CDCl}_3$ )  $\delta = 173.22, 141.18, 140.62, 137.56, 128.82, 127.46, 127.27, 127.12, 126.88, 72.68, 70.32, 21.76, 21.49$ . ESI-HRMS: calcd for  $\text{C}_{17}\text{H}_{18}\text{NaO}_3^+$  [ $\text{M}+\text{Na}^+$ ] 293.1148, found 293.1158.



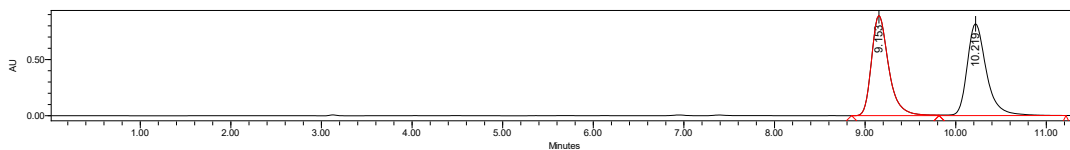

|   | Retention Time | %Area |
|---|----------------|-------|
| 1 | 9.153          | 49.44 |
| 2 | 10.219         | 50.56 |

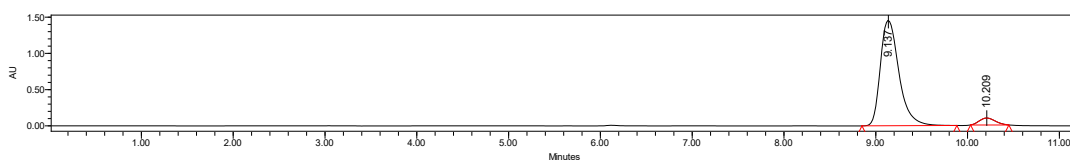

|   | Retention Time | %Area |
|---|----------------|-------|
| 1 | 9.137          | 94.69 |
| 2 | 10.209         | 5.31  |

**(S)-iso-propyl  $\alpha$ -hydroxy- $\alpha$ -(4-methoxyphenyl)acetate (2g)**

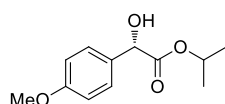

(**C<sub>13</sub>H<sub>18</sub>O<sub>4</sub>**) a white solid; 90% yield, 89% ee.  $[\alpha]_D^{22} = +92.25$  ( $c = 0.258$ , in  $\text{CH}_2\text{Cl}_2$ ). HPLC DAICEL CHIRALCEL IA, 2-propanol/*n*-hexane = 10/90, flow rate = 1.0 mL/min,  $\lambda = 210$  nm, retention time: 5.19 min, 5.99 min.  $^1\text{H}$  NMR (400 MHz,  $\text{CDCl}_3$ )  $\delta$  7.32 (dd,  $J = 9.1, 2.4$  Hz, 2H), 6.96 – 6.83 (m, 2H), 5.15 – 4.99 (m, 2H), 3.80 (s, 3H), 3.44 (dd,  $J = 5.8, 2.6$  Hz, 1H), 1.27 (d,  $J = 6.3$  Hz, 3H), 1.11 (d,  $J = 6.3$  Hz, 3H).  $^{13}\text{C}$  NMR (101 MHz,  $\text{CDCl}_3$ )  $\delta = 173.43, 159.60, 130.82, 127.73, 113.92, 72.51, 70.00, 55.27, 21.70, 21.43$ . ESI-HRMS: calcd for **C<sub>13</sub>H<sub>18</sub>NaO<sub>4</sub><sup>+</sup>**  $[\text{M} + \text{Na}^+]$  261.1097, found 261.1098.

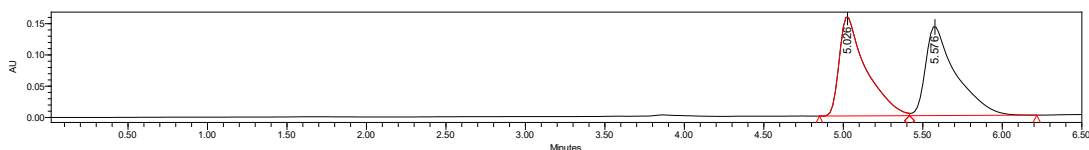

|   | Retention Time | %Area |
|---|----------------|-------|
| 1 | 5.026          | 49.56 |
| 2 | 5.576          | 50.44 |

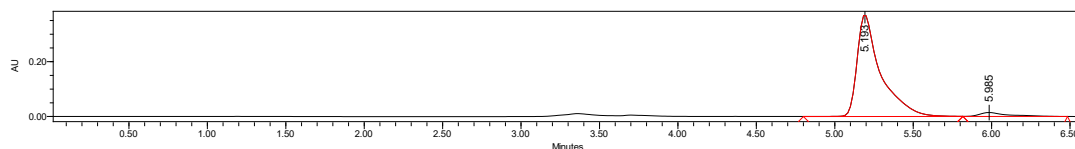

|   | Retention Time | %Area |
|---|----------------|-------|
| 1 | 5.193          | 94.53 |
| 2 | 5.985          | 5.47  |

**(S)-iso-propyl  $\alpha$ -hydroxy- $\alpha$ -(3,4-methylenedioxyphenyl)acetate (2h)**

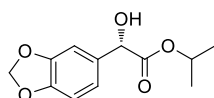

(**C<sub>12</sub>H<sub>14</sub>O<sub>5</sub>**) a white solid; 99% yield, 90% ee.  $[\alpha]_D^{12} = +78.40$  ( $c = 0.250$ , in  $\text{CH}_2\text{Cl}_2$ ). HPLC Phenomenex Lux 5u Cellulose-2, 2-propanol/*n*-hexane = 10/90, flow rate = 1.0 mL/min,  $\lambda = 210$  nm, retention time: 18.66 min, 21.94 min.  $^1\text{H}$  NMR (400 MHz,  $\text{CDCl}_3$ )  $\delta$  6.89 (dd,  $J = 5.8, 1.6$  Hz, 2H), 6.83 – 6.74 (m, 1H), 5.96 (s, 2H), 5.14 – 4.97 (m, 2H), 3.43 (d,  $J = 5.8$  Hz, 1H), 1.28 (d,  $J = 6.3$  Hz, 3H), 1.14 (d,  $J = 6.3$  Hz, 3H).  $^{13}\text{C}$  NMR (101 MHz,  $\text{CDCl}_3$ )  $\delta = 173.23, 147.81, 147.62, 132.48, 120.25, 108.23, 106.88, 101.17, 72.64, 70.23, 21.71, 21.46$ . ESI-HRMS: calcd for **C<sub>12</sub>H<sub>14</sub>NaO<sub>5</sub><sup>+</sup>**  $[M+\text{Na}^+]$  261.0733, found 261.0740.

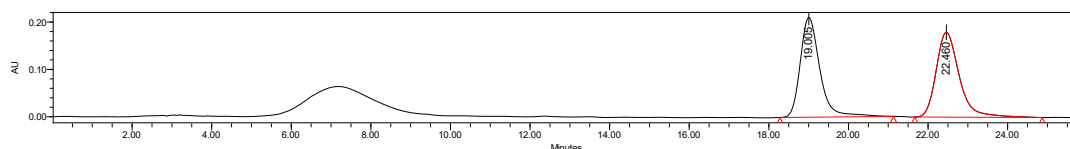

|   | Retention Time | %Area |
|---|----------------|-------|
| 1 | 19.005         | 50.21 |
| 2 | 22.460         | 49.79 |

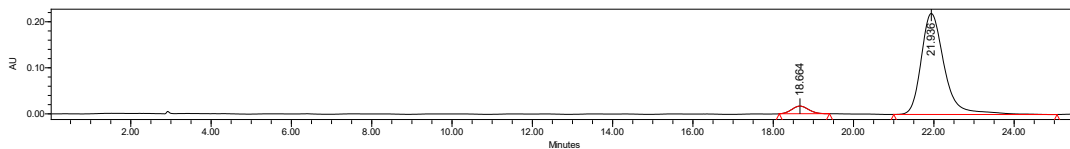

|   | Retention Time | %Area |
|---|----------------|-------|
| 1 | 18.664         | 5.20  |
| 2 | 21.936         | 94.80 |

**(S)-iso-propyl  $\alpha$ -hydroxy- $\alpha$ -(2,4-dimethoxyphenyl)acetate (2i)**

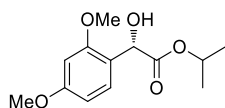

(C<sub>13</sub>H<sub>18</sub>O<sub>4</sub>) a white solid; 99% yield, 90% ee.  $[\alpha]_D^{19} = +83.70$  ( $c = 0.270$ , in CH<sub>2</sub>Cl<sub>2</sub>). HPLC DAICEL CHIRALCEL IA, 2-propanol/*n*-hexane = 10/90, flow rate = 1.0 mL/min,  $\lambda = 210$  nm, retention time: 5.26 min, 8.97 min. <sup>1</sup>H NMR (400 MHz, CDCl<sub>3</sub>)  $\delta$  7.12 – 7.05 (m, 1H), 6.41 – 6.36 (m, 2H), 5.07 (s, 1H), 5.02 (dt,  $J = 12.5, 6.3$  Hz, 1H), 3.73 (d,  $J = 5.0$  Hz, 6H), 3.41 (s, 1H), 1.16 (d,  $J = 6.3$  Hz, 3H), 1.07 (d,  $J = 6.2$  Hz, 3H). <sup>13</sup>C NMR (101 MHz, CDCl<sub>3</sub>)  $\delta = 173.58, 161.15, 158.24, 130.29, 120.03, 104.21, 98.90, 70.07, 69.39, 55.37, 21.69, 21.47$ . ESI-HRMS: calcd for C<sub>13</sub>H<sub>18</sub>NaO<sub>4</sub><sup>+</sup> [M+Na<sup>+</sup>] 261.1097, found 261.1102.

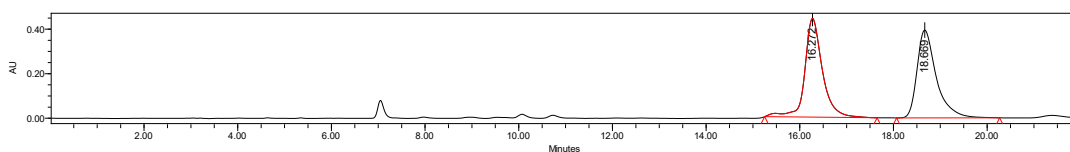

|   | Retention Time | %Area |
|---|----------------|-------|
| 1 | 16.272         | 50.85 |
| 2 | 18.669         | 49.15 |

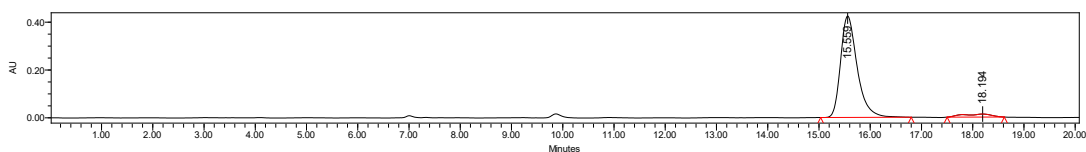

|   | Retention Time | %Area |
|---|----------------|-------|
| 1 | 15.559         | 95.00 |
| 2 | 18.194         | 5.00  |

**(S)-iso-propyl  $\alpha$ -hydroxy- $\alpha$ -(2-fluorophenyl)acetate (2j)**

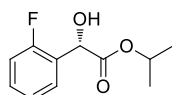

(**C<sub>12</sub>H<sub>15</sub>FO<sub>3</sub>**) a white solid; 99% yield, 92% ee.  $[\alpha]_D^{12} = +100.00$  ( $c = 0.306$ , in  $\text{CH}_2\text{Cl}_2$ ). HPLC Phenomenex Lux 5u Cellulose-2, 2-propanol/*n*-hexane = 10/90, flow rate = 1.0 mL/min,  $\lambda = 210$  nm, retention time: 8.55 min, 9.63 min.  $^1\text{H}$  NMR (400 MHz,  $\text{CDCl}_3$ )  $\delta$  7.45 – 7.28 (m, 2H), 7.21 – 7.00 (m, 2H), 5.34 (d,  $J = 5.2$  Hz, 1H), 5.21 – 5.01 (m, 1H), 3.56 (d,  $J = 5.3$  Hz, 1H), 1.19 (dd,  $J = 59.9, 6.1$  Hz, 6H).  $^{13}\text{C}$  NMR (101 MHz,  $\text{CDCl}_3$ )  $\delta = 172.78, 161.75, 159.28, 130.21, 130.13, 128.71, 128.67, 126.13, 125.99, 124.31, 124.27, 115.78, 115.56, 70.43, 67.74, 21.62, 21.34$ . ESI-HRMS: calcd for **C<sub>11</sub>H<sub>13</sub>FNaO<sub>3</sub><sup>+</sup>** [ $\text{M} + \text{Na}^+$ ] 235.0741, found 235.0741.

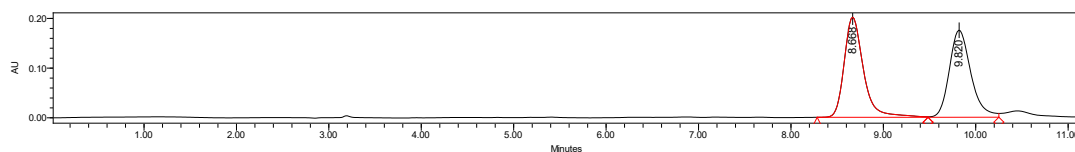

|   | Retention Time | %Area |
|---|----------------|-------|
| 1 | 8.668          | 50.75 |
| 2 | 9.820          | 49.25 |

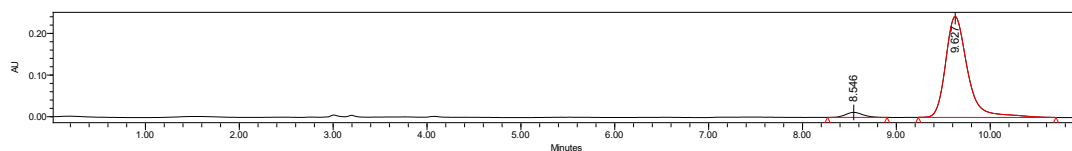

|   | Retention Time | %Area |
|---|----------------|-------|
| 1 | 8.546          | 3.84  |
| 2 | 9.627          | 96.16 |

**(S)-iso-propyl  $\alpha$ -hydroxy- $\alpha$ -(4-fluorophenyl)acetate (2k)**

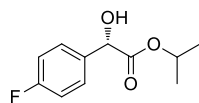

(C<sub>11</sub>H<sub>13</sub>FO<sub>3</sub>) a white solid; 98% yield, 91% ee.  $[\alpha]_D^{19} = +103.17$  ( $c = 0.252$ , in CH<sub>2</sub>Cl<sub>2</sub>). HPLC DAICEL CHIRALCEL IA, 2-propanol/*n*-hexane = 5/95, flow rate = 1.0 mL/min,  $\lambda = 210$  nm, retention time: 8.66 min, 9.34 min. <sup>1</sup>H NMR (400 MHz, CDCl<sub>3</sub>)  $\delta$  7.47 – 7.23 (m, 2H), 7.03 – 6.23 (m, 2H), 5.10 – 4.87 (m, 2H), 3.48 (d,  $J = 5.6$  Hz, 1H), 1.21 (d,  $J = 6.3$  Hz, 3H), 1.04 (d,  $J = 6.2$  Hz, 3H). <sup>13</sup>C NMR (101 MHz, CDCl<sub>3</sub>)  $\delta = 172.04, 162.86, 160.41, 133.32, 133.28, 127.18, 127.10, 114.48, 114.27, 71.17, 69.35, 20.66, 20.37$ . ESI-HRMS: calcd for C<sub>11</sub>H<sub>13</sub>FNaO<sub>3</sub><sup>+</sup> [M+Na<sup>+</sup>] 235.0741, found 235.0747.

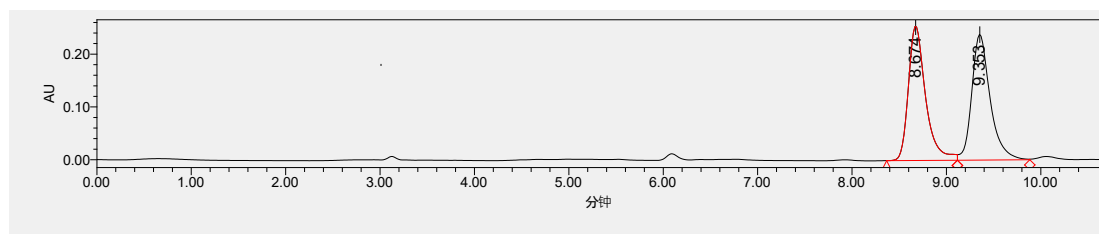

|   | Retention Time | %Area |
|---|----------------|-------|
| 1 | 8.674          | 49.97 |
| 2 | 9.353          | 50.03 |

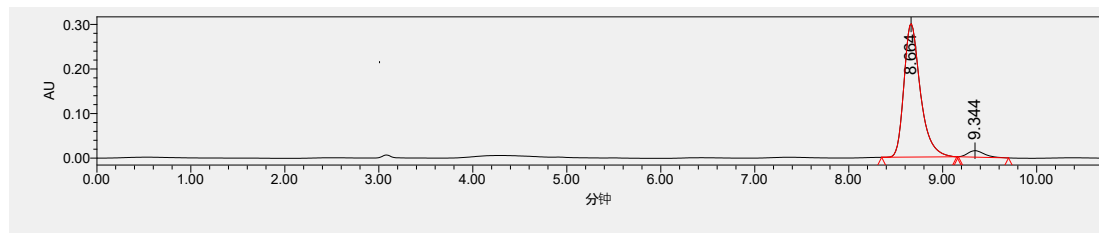

|   | Retention Time | %Area |
|---|----------------|-------|
| 1 | 8.664          | 95.40 |
| 2 | 9.344          | 4.60  |

**(S)-iso-propyl  $\alpha$ -hydroxy- $\alpha$ -(2-chlorophenyl)acetate (2l)**

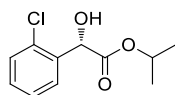

(**C<sub>11</sub>H<sub>13</sub>ClO<sub>3</sub>**) a white solid; 99% yield, 91% ee.  $[\alpha]_D^{20} = +99.15$  ( $c = 0.234$ , in  $\text{CH}_2\text{Cl}_2$ ), HPLC DAICEL CHIRALCEL IA, 2-propanol/*n*-hexane = 10/90, flow rate = 1.0 mL/min,  $\lambda = 210$  nm, retention time: 6.73 min, 7.84 min.  $^1\text{H}$  NMR (400 MHz,  $\text{CDCl}_3$ )  $\delta$  7.35 – 7.27 (m, 2H), 7.22 – 7.17 (m, 2H), 5.43 (d,  $J = 2.9$  Hz, 1H), 5.01 (d,  $J = 6.3$  Hz, 1H), 3.57 (d,  $J = 4.0$  Hz, 1H), 1.19 (d,  $J = 6.3$  Hz, 3H), 1.04 (d,  $J = 6.2$  Hz, 3H).  $^{13}\text{C}$  NMR (101 MHz,  $\text{CDCl}_3$ )  $\delta = 171.73, 135.28, 132.55, 128.86, 128.58, 127.66, 126.02, 69.45, 69.42, 20.59, 20.36$ . ESI-HRMS: calcd for **C<sub>11</sub>H<sub>13</sub>Cl<sup>34</sup>.9689NaO<sub>3</sub><sup>+</sup>**  $[\text{M}+\text{Na}^+]$  251.0445, found 251.0449; calcd for **C<sub>11</sub>H<sub>13</sub>Cl<sup>36</sup>.9659NaO<sub>3</sub><sup>+</sup>**  $[\text{M}+\text{Na}^+]$  253.0416, found 253.0422.

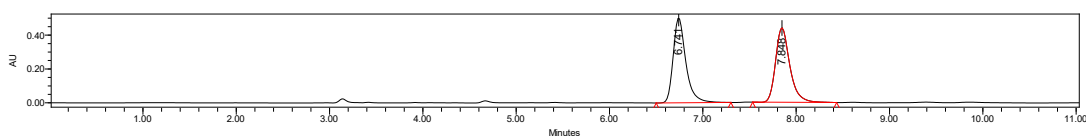

|   | Retention Time | %Area |
|---|----------------|-------|
| 1 | 6.741          | 50.30 |
| 2 | 7.848          | 49.70 |

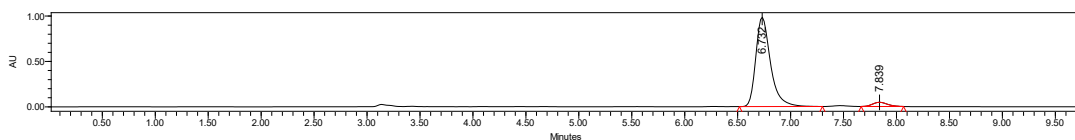

|   | Retention Time | %Area |
|---|----------------|-------|
| 1 | 6.732          | 95.48 |
| 2 | 7.839          | 4.52  |

**(S)-iso-propyl  $\alpha$ -hydroxy- $\alpha$ -(4-chlorophenyl)acetate (2m)**

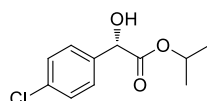

(**C<sub>11</sub>H<sub>13</sub>ClO<sub>3</sub>**) a white solid; 98% yield, 90% ee.  $[\alpha]_D^{18} = +95.93$  ( $c = 0.246$ , in  $\text{CH}_2\text{Cl}_2$ ). HPLC Phenomenex Lux 5u Cellulose-2, 2-propanol/*n*-hexane = 5/95, flow rate = 1.0 mL/min,  $\lambda = 210$  nm, retention time: 9.93 min, 10.51 min.  $^1\text{H}$  NMR (400

MHz, CDCl<sub>3</sub>)  $\delta$  7.38 – 7.11 (m, 4H), 5.13 – 4.81 (m, 2H), 3.50 (d,  $J$  = 5.6 Hz, 1H), 1.21 (d,  $J$  = 6.3 Hz, 3H), 1.04 (d,  $J$  = 6.3 Hz, 3H). <sup>13</sup>C NMR (101 MHz, CDCl<sub>3</sub>)  $\delta$  = 171.82, 135.98, 133.09, 127.62, 126.76, 71.15, 69.48, 20.66, 20.38. ESI-HRMS: calcd for C<sub>11</sub>H<sub>13</sub>Cl<sup>34.9689</sup>NaO<sub>3</sub><sup>+</sup> [M+Na<sup>+</sup>] 251.0445, found 251.0449; calcd for C<sub>11</sub>H<sub>13</sub>Cl<sup>36.9659</sup>NaO<sub>3</sub><sup>+</sup> [M+Na<sup>+</sup>] 253.0416, found 253.0391.

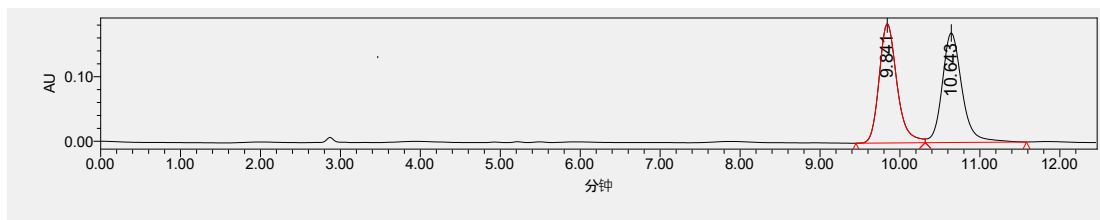

|   | Retention Time | %Area |
|---|----------------|-------|
| 1 | 9.841          | 49.67 |
| 2 | 10.643         | 50.33 |

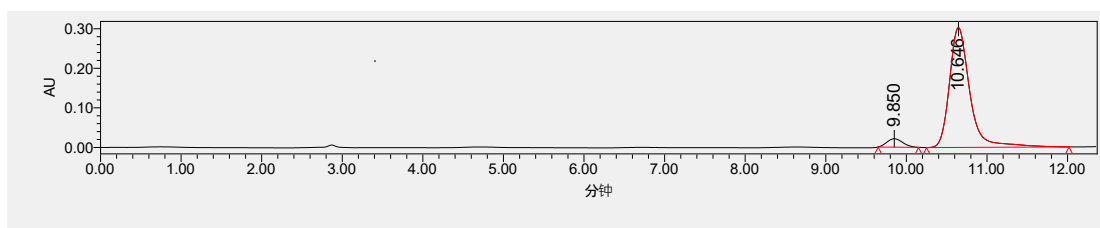

|   | Retention Time | %Area |
|---|----------------|-------|
| 1 | 9.850          | 5.18  |
| 2 | 10.646         | 94.82 |

**(S)-iso-propyl  $\alpha$ -hydroxy- $\alpha$ -(2,3,4-trichlorophenyl)acetate (2n)**

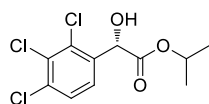

(C<sub>11</sub>H<sub>11</sub>Cl<sub>3</sub>O<sub>3</sub>) a white solid; 99% yield, 89% ee. [ $\alpha$ ]<sub>D</sub><sup>16</sup> = +127.69 ( $c$  = 0.242, in CH<sub>2</sub>Cl<sub>2</sub>). HPLC Phenomenex Lux 5u Cellulose-2, 2-propanol/*n*-hexane = 5/95, flow rate = 1.0 mL/min,  $\lambda$  = 210 nm, retention time: 9.93 min, 11.08 min. <sup>1</sup>H NMR (400 MHz, CDCl<sub>3</sub>)  $\delta$  7.40 (d,  $J$  = 8.4 Hz, 1H), 7.27 (d,  $J$  = 8.2 Hz, 1H), 5.49 (d,  $J$  = 3.6 Hz, 1H), 5.08 (dt,  $J$  = 12.0, 6.0 Hz, 1H), 3.77 (d,  $J$  = 4.0 Hz, 1H), 1.20 (dd,  $J$  = 54.4, 6.2 Hz, 6H). <sup>13</sup>C NMR (101 MHz, CDCl<sub>3</sub>)  $\delta$  = 172.01, 136.95, 134.14, 133.62, 132.26,

128.44, 126.78, 70.99, 70.77, 21.58, 21.42. ESI-HRMS: calcd for  $C_{11}H_{11}Cl_3^{34.9689}NaO_3^+$   $[M+Na^+]$  318.9671, found 318.9676; calcd for  $C_{11}H_{11}Cl_2^{34.9689}Cl^{36.9659}NaO_3^+$   $[M+Na^+]$  320.9642, found 320.9656.

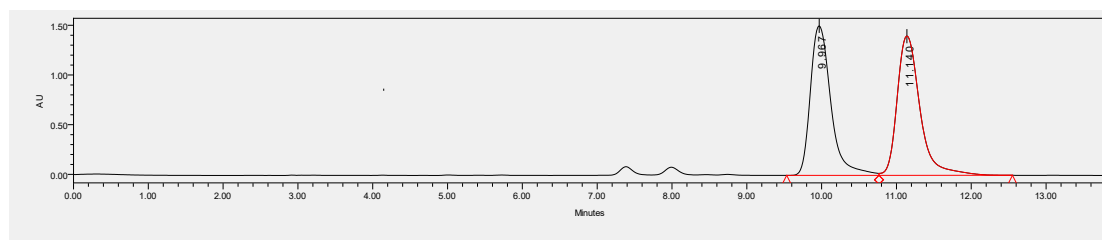

|   | Retention Time | %Area |
|---|----------------|-------|
| 1 | 9.967          | 49.15 |
| 2 | 11.140         | 50.85 |

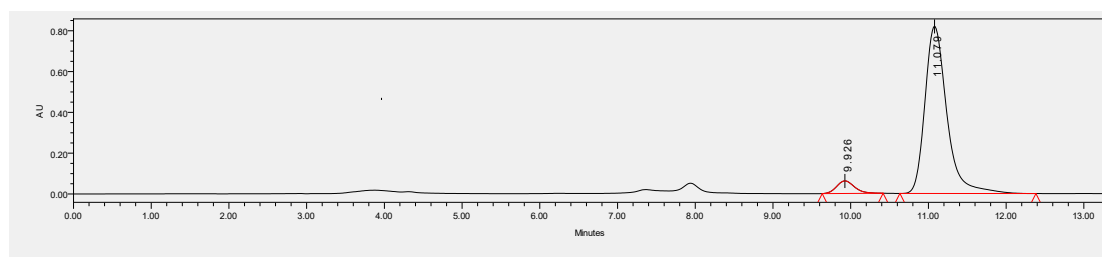

|   | Retention Time | %Area |
|---|----------------|-------|
| 1 | 9.926          | 5.75  |
| 2 | 11.079         | 94.25 |

**(S)-iso-propyl  $\alpha$ -hydroxy- $\alpha$ -(2-bromophenyl)acetate (2o)**

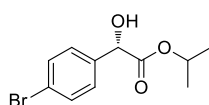

( $C_{11}H_{13}BrO_3$ ) a white solid; 98% yield, 90% ee.  $[\alpha]_D^{20} = +79.11$  ( $c = 0.316$ , in  $CH_2Cl_2$ ). HPLC Phenomenex Lux 5u Cellulose-2, 2-propanol/*n*-hexane = 2/98, flow rate = 1.0 mL/min,  $\lambda = 210$  nm, retention time: 19.11 min, 20.39 min.  $^1H$  NMR (400 MHz,  $CDCl_3$ )  $\delta$  7.46 – 7.33 (m, 2H), 7.27 – 7.17 (m, 2H), 5.13 – 4.84 (m, 2H), 3.52 (d,  $J = 5.6$  Hz, 1H), 1.21 (d,  $J = 6.3$  Hz, 3H), 1.04 (d,  $J = 6.3$  Hz, 3H).  $^{13}C$  NMR (101 MHz,  $CDCl_3$ )  $\delta = 172.41, 137.97, 131.52, 128.08, 122.11, 83.55, 72.35, 27.83$ .  $^{13}C$  NMR (101 MHz,  $CDCl_3$ )  $\delta = 172.77, 137.53, 131.60, 128.13, 122.31, 72.24, 70.54, 21.70$ .



21.42. ESI-HRMS: calcd for  $C_{11}H_{13}Br^{78,9183}NaO_3^+$   $[M+Na^+]$  294.9940, found 294.9948; calcd for  $C_{11}H_{13}Br^{80,9163}NaO_3^+$   $[M+Na^+]$  296.9920, found 296.9900.

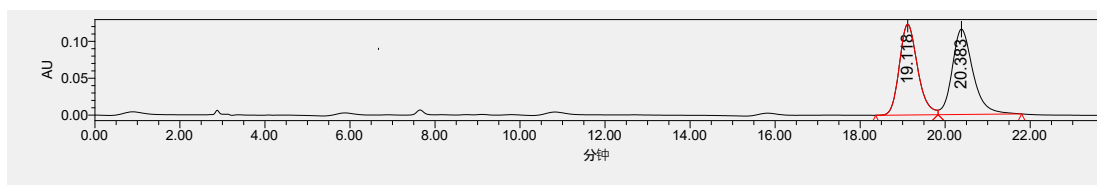

|   | Retention Time | %Area |
|---|----------------|-------|
| 1 | 19.118         | 48.23 |
| 2 | 20.383         | 51.77 |

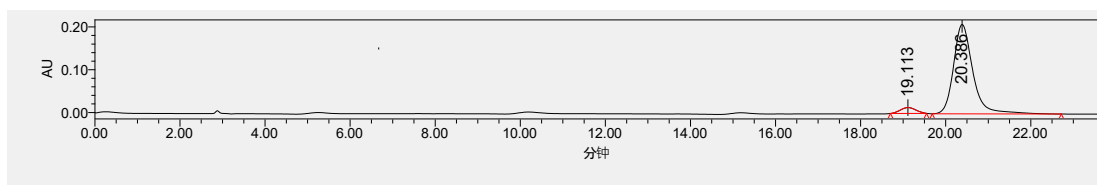

|   | Retention Time | %Area |
|---|----------------|-------|
| 1 | 19.113         | 5.04  |
| 2 | 20.386         | 94.96 |

**(S)-iso-propyl  $\alpha$ -hydroxy- $\alpha$ -(4-(trifluoromethyl)phenyl)acetate (2p)**

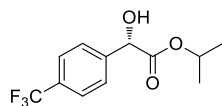

( $C_{13}H_{15}F_3O_3$ ) a white solid; 99% yield, 85% ee.  $[\alpha]_D^{17} = +73.62$  ( $c = 0.254$ , in  $CH_2Cl_2$ ). HPLC Phenomenex Lux 5u Cellulose-2, 2-propanol/*n*-hexane = 5/95, flow rate = 1.0 mL/min,  $\lambda = 210$  nm, retention time: 7.48 min, 8.28 min.  $^1H$  NMR (400 MHz,  $CDCl_3$ )  $\delta$  7.69 – 7.46 (m, 4H), 5.11 (d,  $J = 5.2$  Hz, 1H), 5.00 (dt,  $J = 12.5, 6.3$  Hz, 2H), 3.56 (d,  $J = 5.5$  Hz, 1H), 1.23 (d,  $J = 6.3$  Hz, 3H), 1.04 (d,  $J = 6.3$  Hz, 3H).  $^{13}C$  NMR (101 MHz,  $CDCl_3$ )  $\delta = 171.50, 141.29, 129.59, 129.26, 125.71, 124.44, 124.40, 124.36, 124.32, 121.64, 71.24, 69.78, 20.65, 20.36$ . ESI-HRMS: calcd for  $C_{12}H_{13}F_3NaO_5^+$   $[M+Na^+]$  285.0709, found 285.0719.

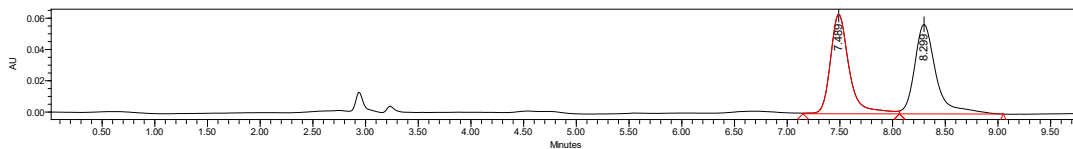

|   | Retention Time | %Area |
|---|----------------|-------|
| 1 | 7.489          | 49.44 |
| 2 | 8.299          | 50.56 |

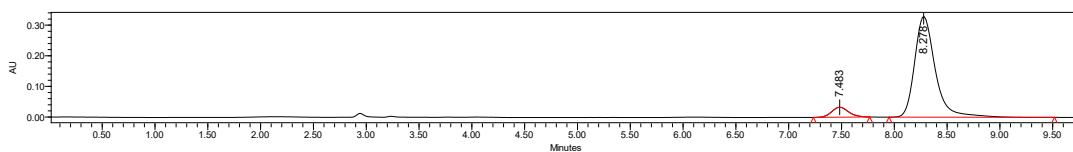

|   | Retention Time | %Area |
|---|----------------|-------|
| 1 | 7.483          | 7.51  |
| 2 | 8.278          | 92.49 |

### (*S*)-*iso*-propyl $\alpha$ -hydroxy- $\alpha$ -(naphthalen-1-yl)acetate (**2q**)

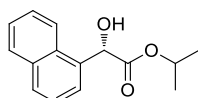

(**C<sub>16</sub>H<sub>18</sub>O<sub>3</sub>**) a white solid; 99% yield, 86% ee.  $[\alpha]_D^{25} = +93.18$  ( $c = 0.264$ , in  $\text{CH}_2\text{Cl}_2$ ). HPLC Phenomenex Lux 5u Cellulose-2, 2-propanol/*n*-hexane = 10/90, flow rate = 1.0 mL/min,  $\lambda = 210$  nm, retention time: 13.56 min, 15.76 min.  $^1\text{H}$  NMR (400 MHz,  $\text{CDCl}_3$ )  $\delta$  8.18 – 8.02 (m, 1H), 7.85 – 7.71 (m, 2H), 7.51 – 7.31 (m, 4H), 5.69 (s, 1H), 5.02 (dt,  $J = 12.5, 6.3$  Hz, 1H), 3.53 (s, 1H), 1.16 (d,  $J = 6.3$  Hz, 3H), 0.92 (d,  $J = 6.2$  Hz, 3H).  $^{13}\text{C}$  NMR (101 MHz,  $\text{CDCl}_3$ )  $\delta = 173.77, 134.35, 134.02, 131.10, 129.31, 128.74, 126.40, 125.84, 125.63, 125.20, 123.85, 71.40, 70.32, 21.68, 21.36$ . ESI-HRMS: calcd for **C<sub>16</sub>H<sub>18</sub>NaO<sub>3</sub><sup>+</sup>**  $[M+\text{Na}^+]$  267.0997, found 267.0998.

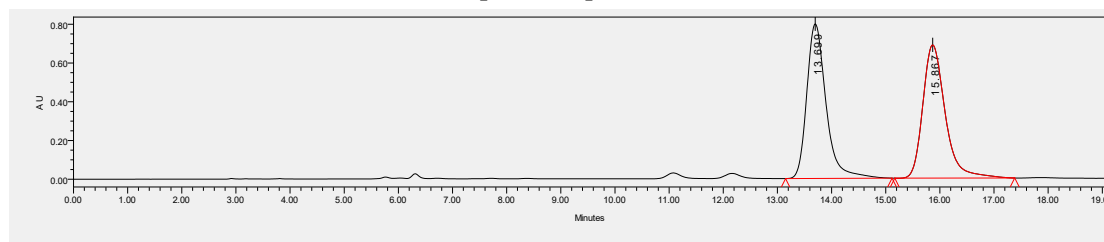

|   | Retention Time | %Area |
|---|----------------|-------|
| 1 | 13.699         | 50.00 |
| 2 | 15.867         | 50.00 |

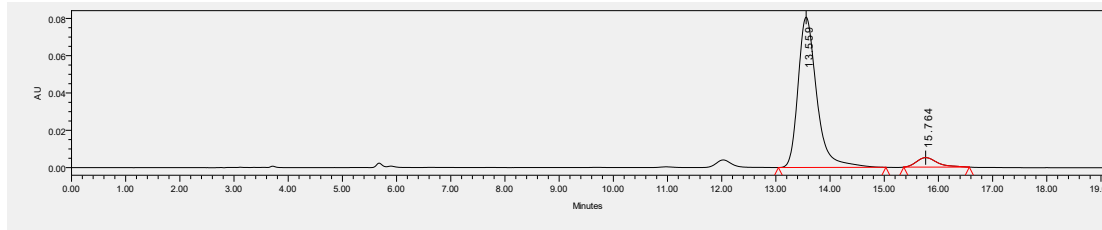

|   | Retention Time | %Area |
|---|----------------|-------|
| 1 | 13.559         | 93.37 |
| 2 | 15.764         | 6.63  |

### (*S*)-*iso*-propyl $\alpha$ -hydroxy- $\alpha$ -(naphthalen-2-yl)acetate (**2r**)

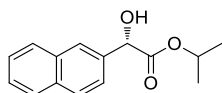

(**C<sub>16</sub>H<sub>18</sub>O<sub>3</sub>**) a white solid; 99% yield, 86% ee.  $[\alpha]_D^{25} = +85.71$  ( $c = 0.308$ , in  $\text{CH}_2\text{Cl}_2$ ). HPLC Phenomenex Lux 5u Cellulose-2, 2-propanol/*n*-hexane = 10/90, flow rate = 1.0 mL/min,  $\lambda = 210$  nm, retention time: 11.86 min, 13.28 min.  $^1\text{H}$  NMR (400 MHz,  $\text{CDCl}_3$ )  $\delta$  7.83 (s, 1H), 7.80 – 7.67 (m, 3H), 7.49 – 7.35 (m, 3H), 5.21 (d,  $J = 5.2$  Hz, 1H), 5.00 (dt,  $J = 12.5, 6.3$  Hz, 1H), 3.59 (d,  $J = 5.7$  Hz, 1H), 1.20 (d,  $J = 6.3$  Hz, 3H), 1.00 (d,  $J = 6.3$  Hz, 3H).  $^{13}\text{C}$  NMR (101 MHz,  $\text{CDCl}_3$ )  $\delta = 173.27, 135.94, 133.24, 133.20, 128.34, 128.16, 127.71, 126.28, 126.27, 125.79, 124.14, 73.06, 70.36, 21.75, 21.45$ . ESI-HRMS: calcd for **C<sub>16</sub>H<sub>18</sub>NaO<sub>3</sub><sup>+</sup>** [ $\text{M}+\text{Na}^+$ ] 267.0997, found 267.0995.

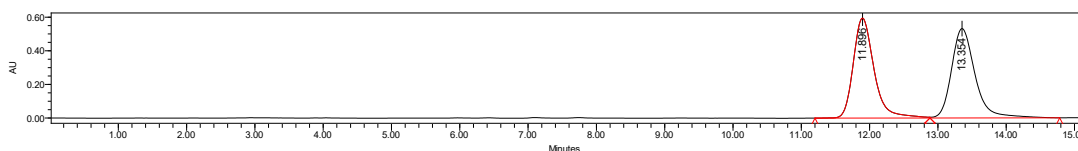

|   | Retention Time | %Area |
|---|----------------|-------|
| 1 | 11.896         | 49.78 |

|   |        |       |
|---|--------|-------|
| 2 | 13.354 | 50.22 |
|---|--------|-------|

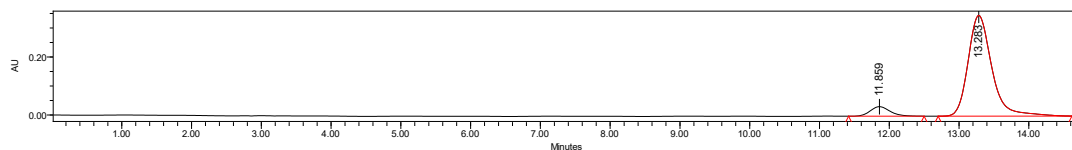

|   | Retention Time | %Area |
|---|----------------|-------|
| 1 | 11.859         | 6.95  |
| 2 | 13.283         | 93.05 |

**(S)- 2-bromo-1-phenylethanol (2v)**

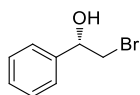

(**C<sub>12</sub>H<sub>16</sub>O<sub>3</sub>**) a white solid; 95% yield, 81% ee.  $[\alpha]_D^{27} = +44.36$  ( $c = 0.780$ , in  $\text{CHCl}_3$ ), {Lit.<sup>[5]</sup> $[\alpha]_D^{20} = -45.5$  ( $c = 1.0$ ,  $\text{CHCl}_3$ ), conf. (*R*)}. HPLC DAICEL CHIRALCEL ODH, 2-propanol/*n*-hexane = 5/95, flow rate = 1.0 mL/min,  $\lambda = 210$  nm, retention time: 13.47 min, 14.75 min. <sup>1</sup>H NMR (400 MHz,  $\text{CDCl}_3$ )  $\delta$  7.39 – 7.27 (m, 5H), 4.93 – 4.81 (m, 1H), 3.58 (dd,  $J = 10.5, 3.5$  Hz, 1H), 3.49 (dd,  $J = 10.4, 8.8$  Hz, 1H), 2.94 (d,  $J = 2.8$  Hz, 1H). <sup>13</sup>C NMR (101 MHz,  $\text{CDCl}_3$ )  $\delta = 140.44, 128.72, 128.50, 126.06, 73.83, 40.07$ . ESI-HRMS: calcd for **C<sub>11</sub>H<sub>14</sub>Br<sup>78,9183</sup>NaO<sub>3</sub><sup>+</sup>**  $[\text{M}+\text{Na}^+]$  222.9734, found 222.9739. **C<sub>11</sub>H<sub>14</sub>Br<sup>80,9163</sup>NaO<sub>3</sub><sup>+</sup>**  $[\text{M}+\text{Na}^+]$  224.9714, found 224.9725.

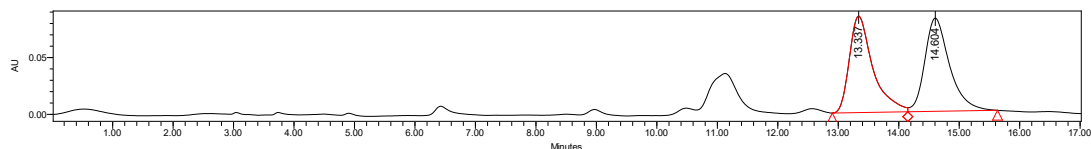

|   | Retention Time | %Area |
|---|----------------|-------|
| 1 | 13.337         | 49.54 |
| 2 | 14.604         | 50.46 |

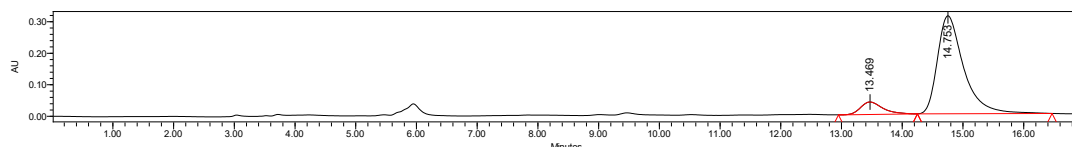

|   | Retention Time | %Area |
|---|----------------|-------|
| 1 | 13.469         | 9.74  |
| 2 | 14.753         | 90.26 |

**(J) Spectral characterization data and HPLC conditions for the alkyl products**

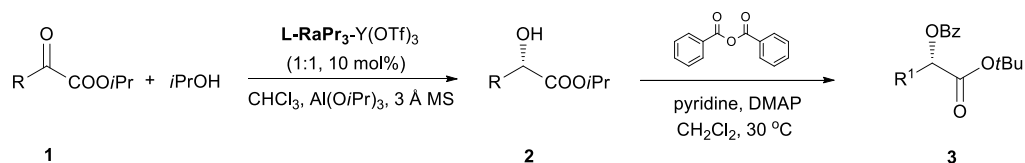

**2s-2t** (x mmol) obtained in asymmetric intramolecular Cannizzaro reaction, benzoic anhydride (1.1x mmol), pyridine (x mmol), DMAP (x mmol) and CH<sub>2</sub>Cl<sub>2</sub> (1 mL) were added in the reaction tube sequentially. The reaction was stirred vigorously at 30°C (monitored by TLC). The mixture was purified by column chromatography on silica gel (petroleum ether/ethyl acetate) to afford the desired product **2s-2t**. The ee of **2s-2t** was determined according to the ee of **3s-3t**.

**(S)-iso-propyl 2-hydroxyhexanoate (2s)**

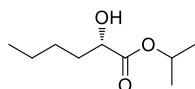

(C<sub>9</sub>H<sub>18</sub>O<sub>3</sub>) a colorless oil; 99% yield.  $[\alpha]_D^{19} = +15.08$  ( $c = 0.252$ , in CH<sub>2</sub>Cl<sub>2</sub>).  
ESI-HRMS: calcd for C<sub>9</sub>H<sub>18</sub>NaO<sub>3</sub><sup>+</sup> [M+Na<sup>+</sup>] 117.1154, found 117.1161.

**(S)-iso-propyl 2-benzoxyhexanoate (3s)**

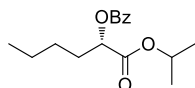

(C<sub>16</sub>H<sub>22</sub>O<sub>4</sub>) a colorless oil; 90% ee.  $[\alpha]_D^{18} = +67.75$  ( $c = 0.306$ , in CH<sub>2</sub>Cl<sub>2</sub>). HPLC Phenomenex Lux 5u Cellulose-2, 2-propanol/*n*-hexane = 5/95, flow rate = 1.0

mL/min,  $\lambda = 210$  nm, retention time: 5.05 min, 5.53 min.  $^1\text{H}$  NMR (400 MHz,  $\text{CDCl}_3$ )  $\delta$  8.11 – 7.97 (m, 2H), 7.51 (t,  $J = 7.4$  Hz, 1H), 7.45 – 7.34 (m, 2H), 5.22 – 5.06 (m, 1H), 5.02 (dt,  $J = 12.5, 6.3$  Hz, 1H), 2.00 – 1.83 (m, 2H), 1.45 – 1.29 (m, 4H), 1.21 (d,  $J = 6.3$  Hz, 3H), 1.17 (d,  $J = 6.3$  Hz, 3H), 0.87 (t,  $J = 7.1$  Hz, 3H).  $^{13}\text{C}$  NMR (101 MHz,  $\text{CDCl}_3$ )  $\delta = 169.91, 166.18, 133.22, 129.82, 129.68, 128.40, 73.05, 68.96, 30.93, 27.36, 22.32, 21.75, 21.70, 13.90$ . ESI-HRMS: calcd for  $\text{C}_{16}\text{H}_{22}\text{NaO}_4^+$  [ $\text{M}+\text{Na}^+$ ] 301.1416, found 301.1414.

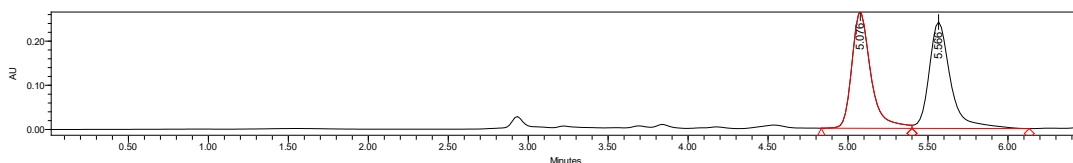

|   | Retention Time | %Area |
|---|----------------|-------|
| 1 | 5.076          | 49.32 |
| 2 | 5.566          | 50.68 |

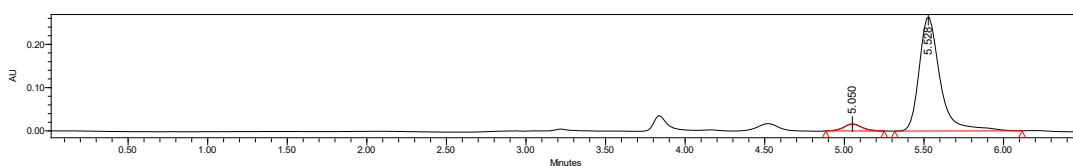

|   | Retention Time | %Area |
|---|----------------|-------|
| 1 | 5.050          | 5.08  |
| 2 | 5.528          | 94.92 |

### **(S)-iso-propyl 2-hydroxy-2-(adamantan-1-yl)acetate (2u)**

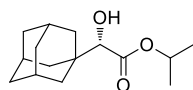

( $\text{C}_{15}\text{H}_{24}\text{O}_3$ ) a colorless oil; 99% yield.  $[\alpha]_{\text{D}}^{19} = +81.20$  ( $c = 0.266$ , in  $\text{CH}_2\text{Cl}_2$ ).  $^1\text{H}$  NMR (400 MHz,  $\text{CDCl}_3$ )  $\delta$  5.06 (dt,  $J = 12.5, 6.3$  Hz, 1H), 3.53 (s, 1H), 2.63 (s, 1H), 1.93 (s, 3H), 1.64 (d,  $J = 12.0$  Hz, 3H), 1.56 (d,  $J = 9.8$  Hz, 9H), 1.23 (t,  $J = 6.4$  Hz, 6H).  $^{13}\text{C}$  NMR (101 MHz,  $\text{CDCl}_3$ )  $\delta = 173.49, 78.80, 69.35, 37.96, 37.15, 36.94$ ,

28.26, 22.08, 21.89. ESI-HRMS: calcd for  $C_{15}H_{24}NaO_3^+$   $[M+Na^+]$  275.1623, found 275.1615.

**(S)-iso-propyl 2-benzyloxy-2-(adamantan-1-yl)acetate (3u)**

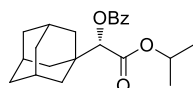

( $C_{22}H_{28}O_3$ ) a colorless oil; 84% ee.  $[\alpha]_D^{18} = +90.78$  ( $c = 0.326$ , in  $CH_2Cl_2$ ). HPLC DAICEL CHIRALCEL IC, 2-propanol/*n*-hexane = 5/95, flow rate = 1.0 mL/min,  $\lambda = 210$  nm, retention time: 7.63 min, 8.25 min. ESI-HRMS: calcd for  $C_{22}H_{28}NaO_3^+$   $[M+Na^+]$  379.1885, found 379.1888.

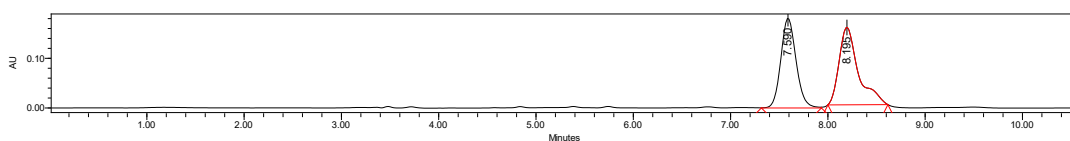

|   | Retention Time | %Area |
|---|----------------|-------|
| 1 | 7.590          | 47.92 |
| 2 | 8.195          | 52.08 |

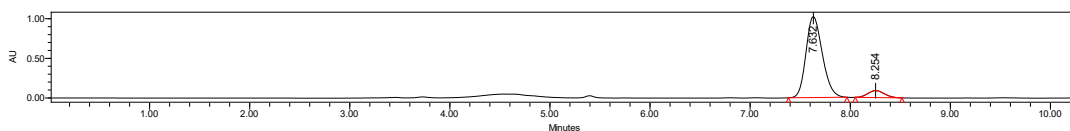

|   | Retention Time | %Area |
|---|----------------|-------|
| 1 | 7.632          | 91.99 |
| 2 | 8.254          | 8.01  |

## (K) Copies of NMR spectra for catalysts and products

### (S)-iso-propyl mandelate (2a)

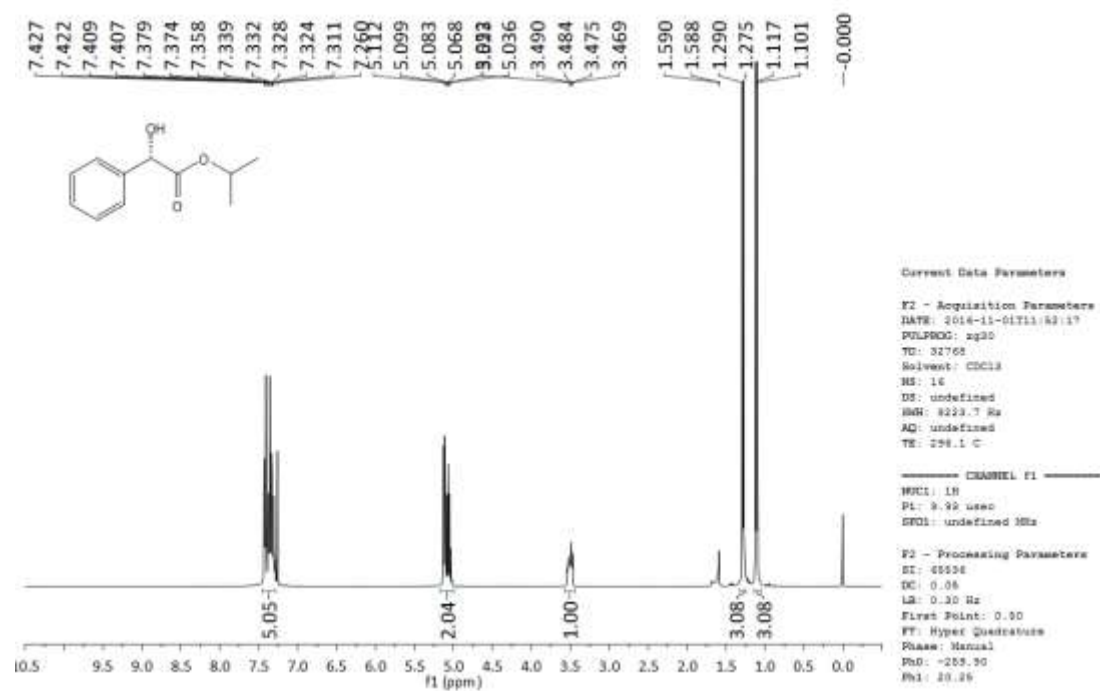



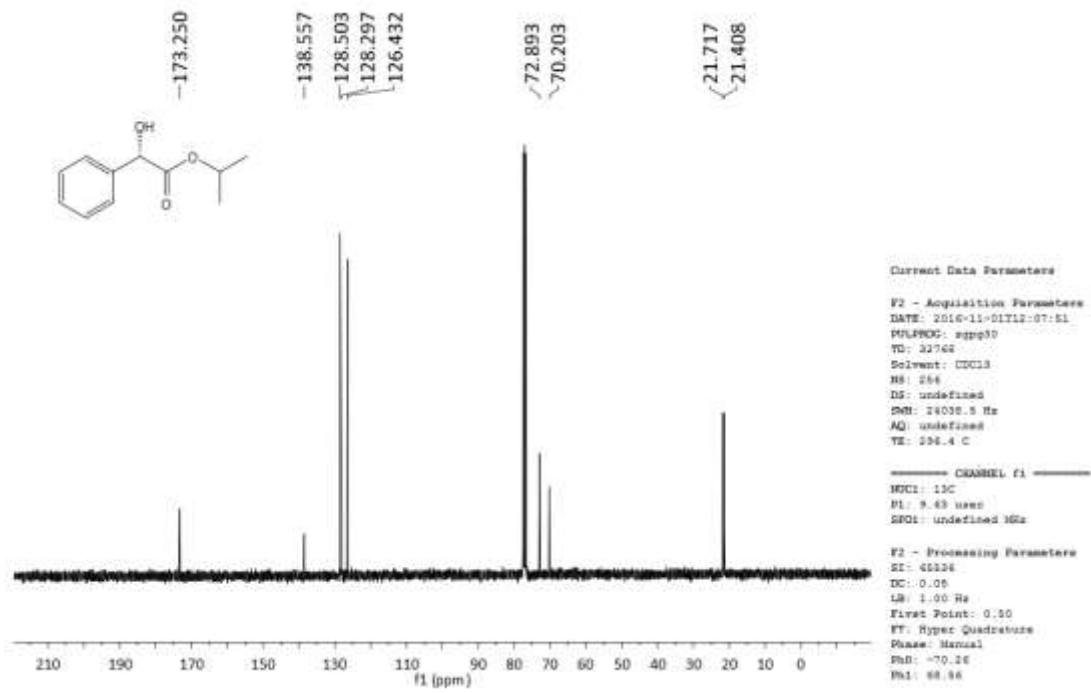

**(S)-iso-propyl  $\alpha$ -hydroxy- $\alpha$ -(2-methylphenyl)acetate (2b)**

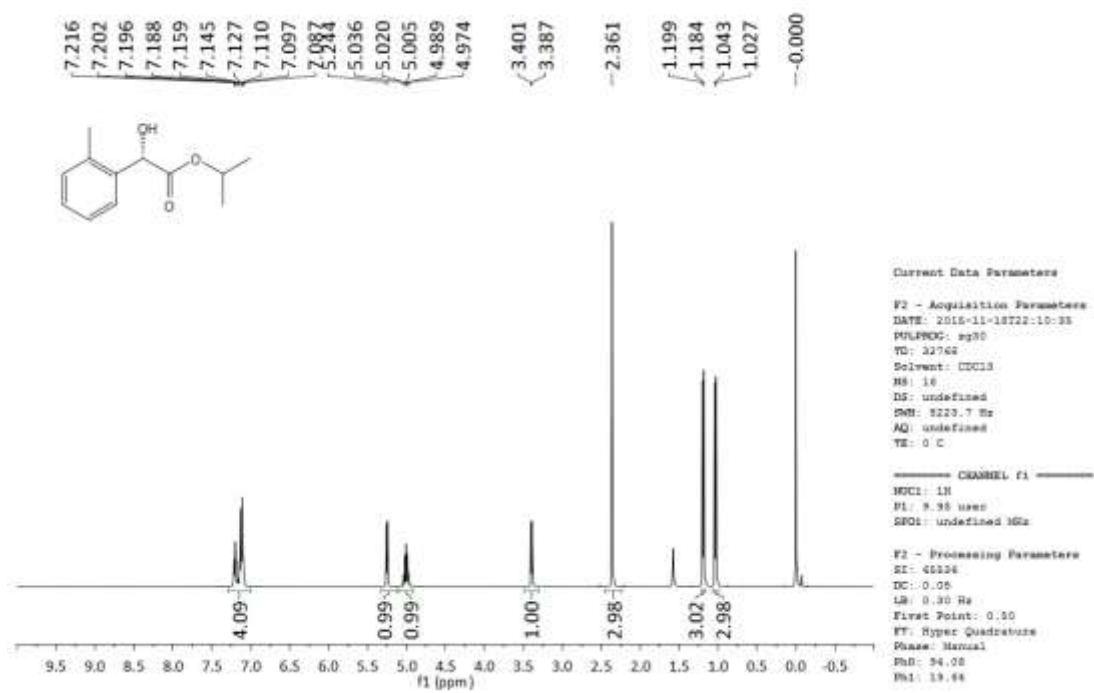

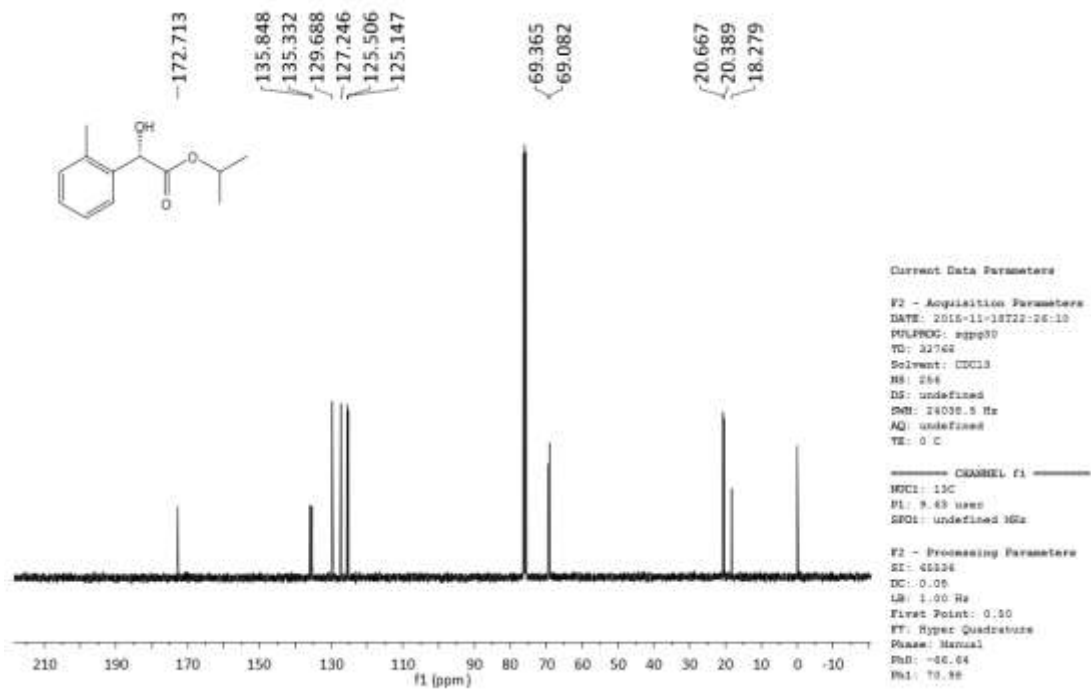

**(S)-iso-propyl  $\alpha$ -hydroxy- $\alpha$ -(3-methylphenyl)acetate (2c)**

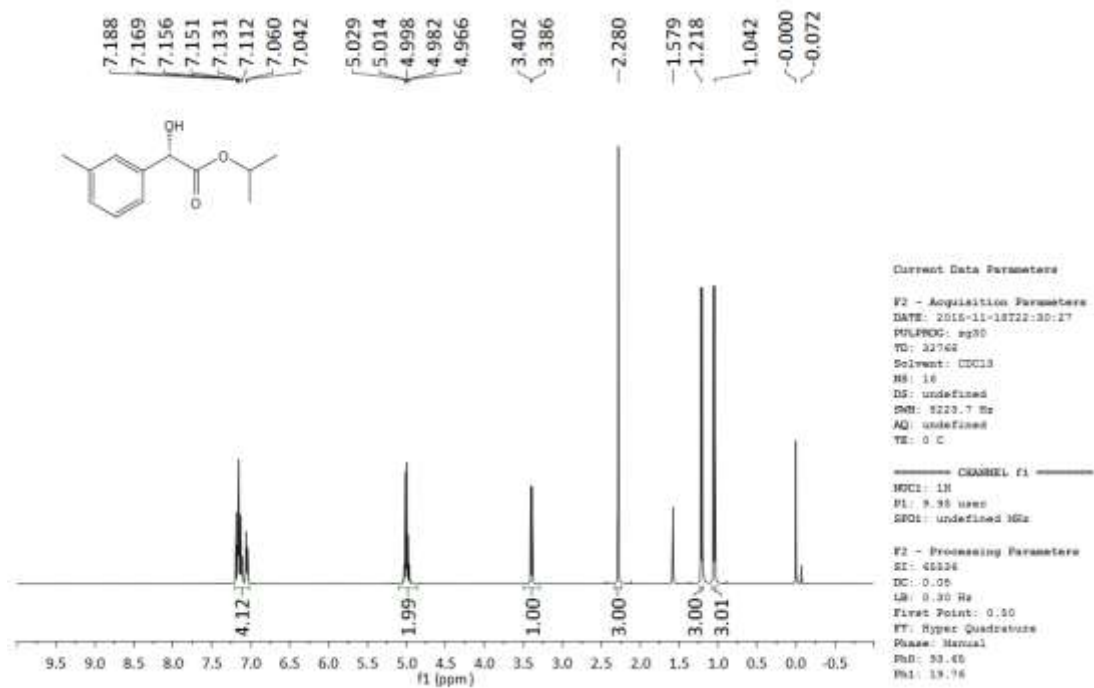

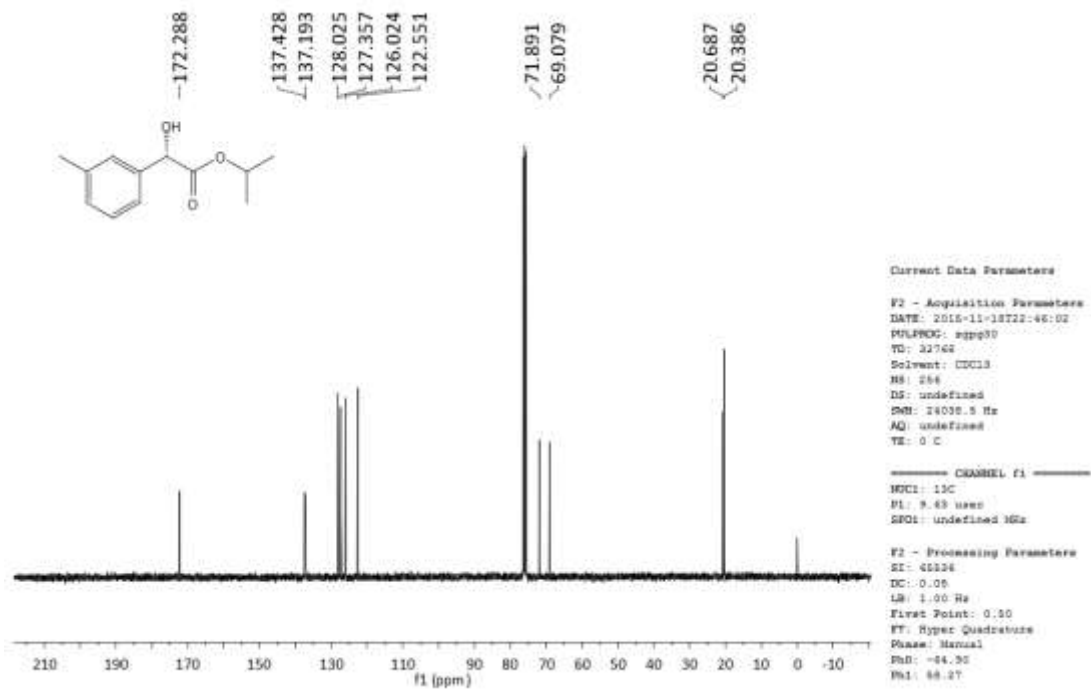

**(S)-iso-propyl  $\alpha$ -hydroxy- $\alpha$ -(4-methylphenyl)acetate (2d)**

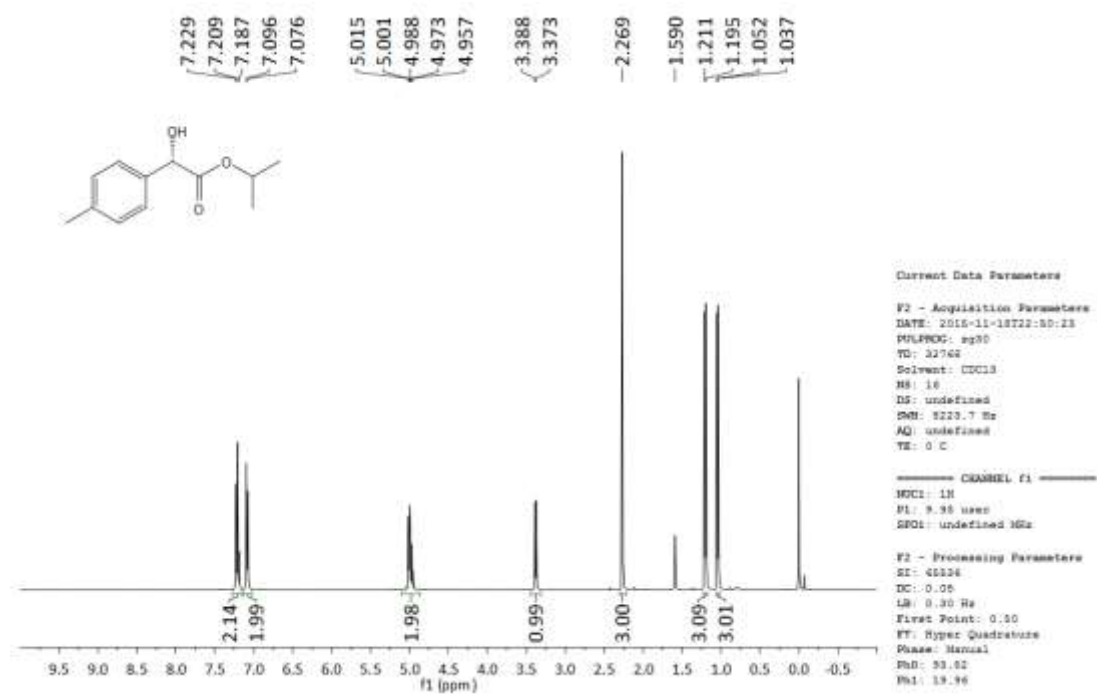

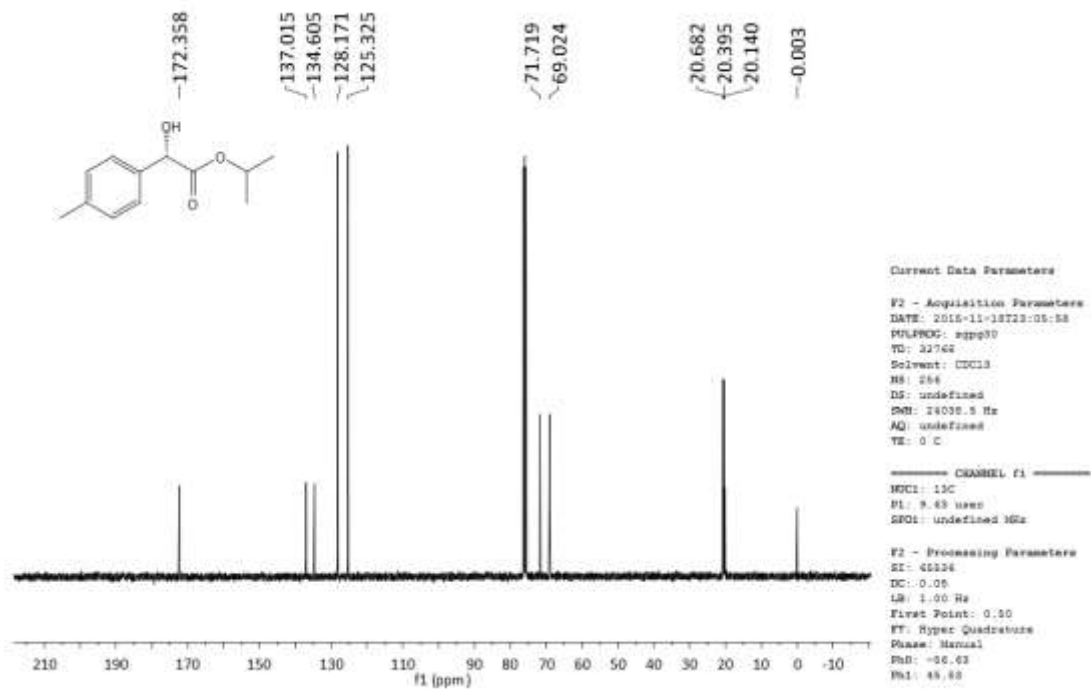

**(S)-iso-propyl  $\alpha$ -hydroxy- $\alpha$ -(4-(*tert*-butyl)phenyl)acetate (2e)**

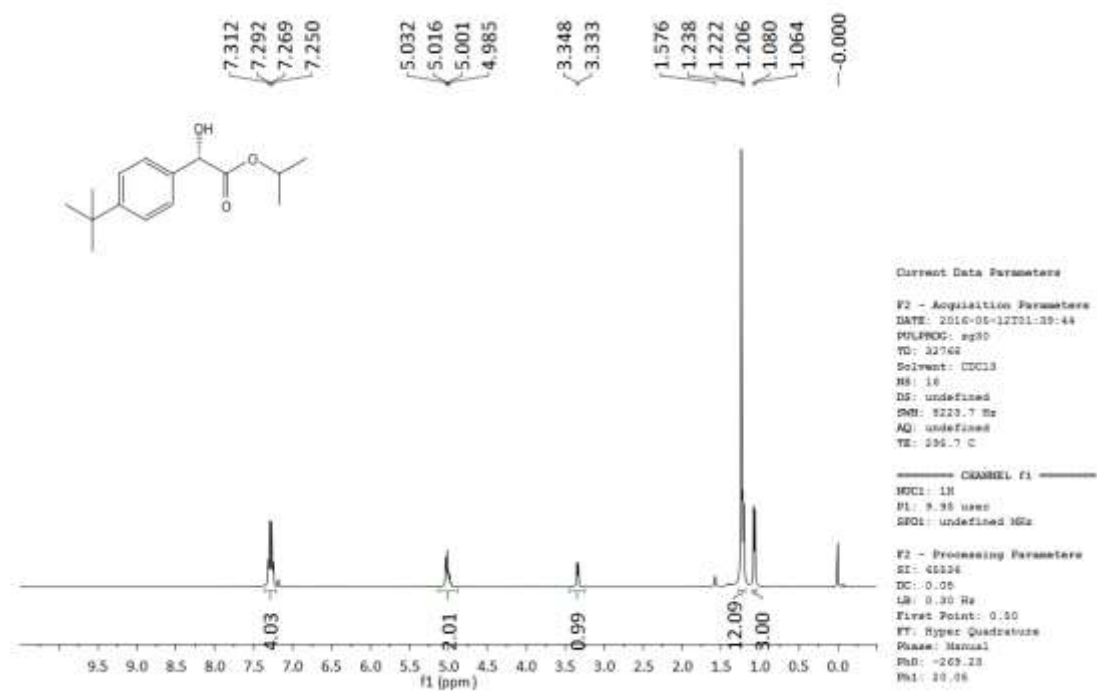



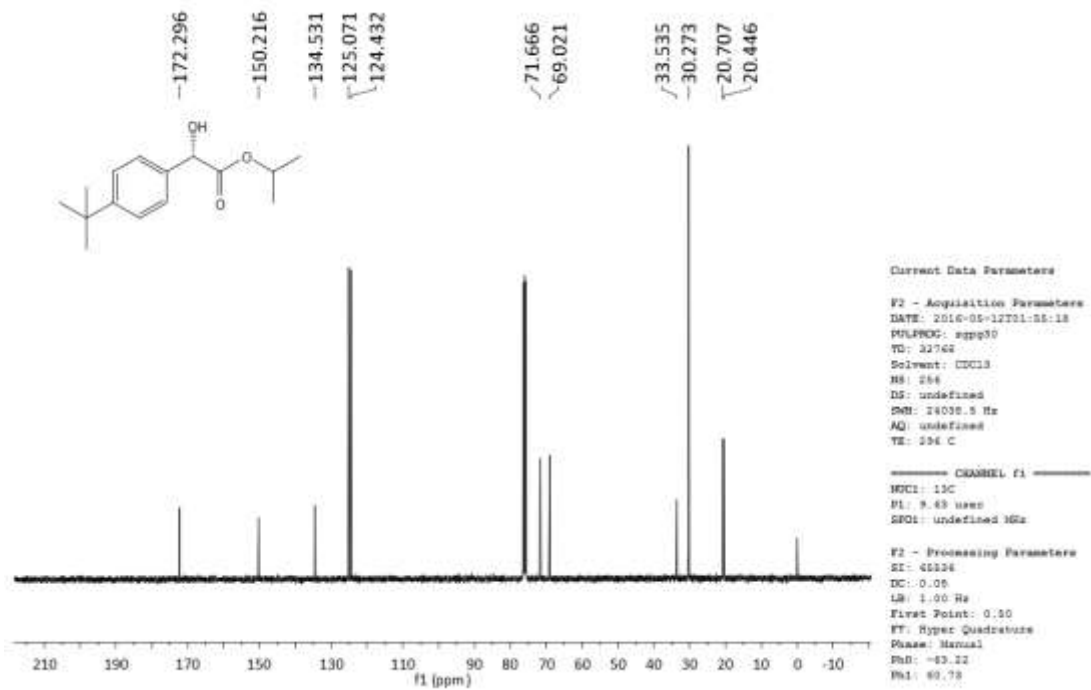

**(S)-iso-propyl  $\alpha$ -hydroxy- $\alpha$ -(4-phenylphenyl)acetate (2f)**

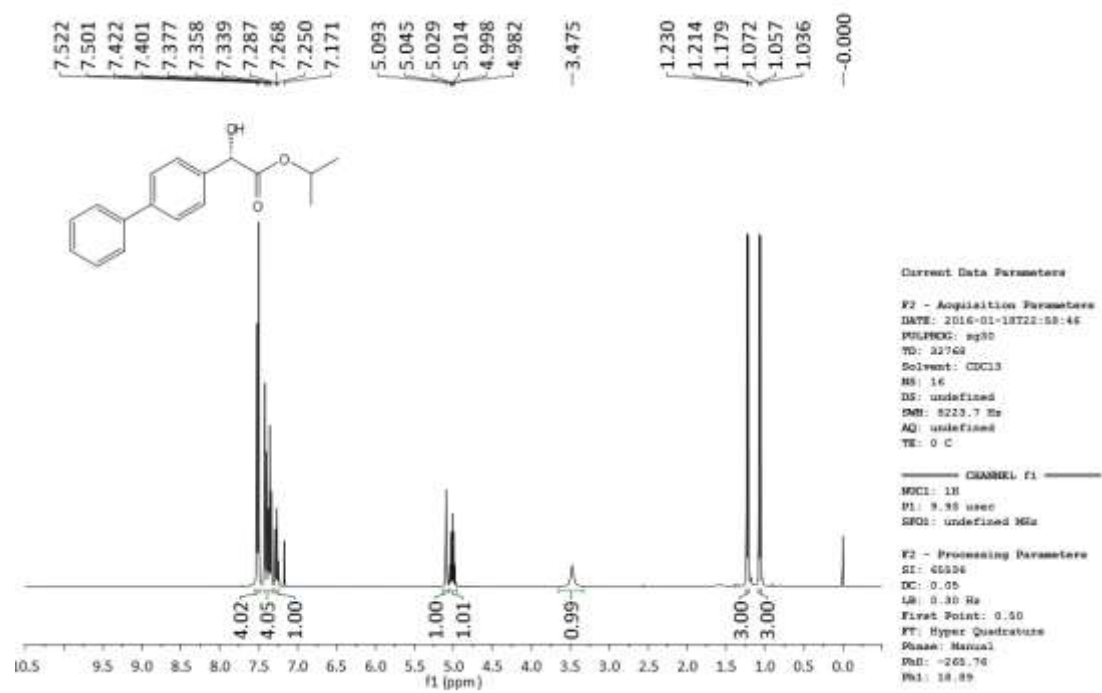

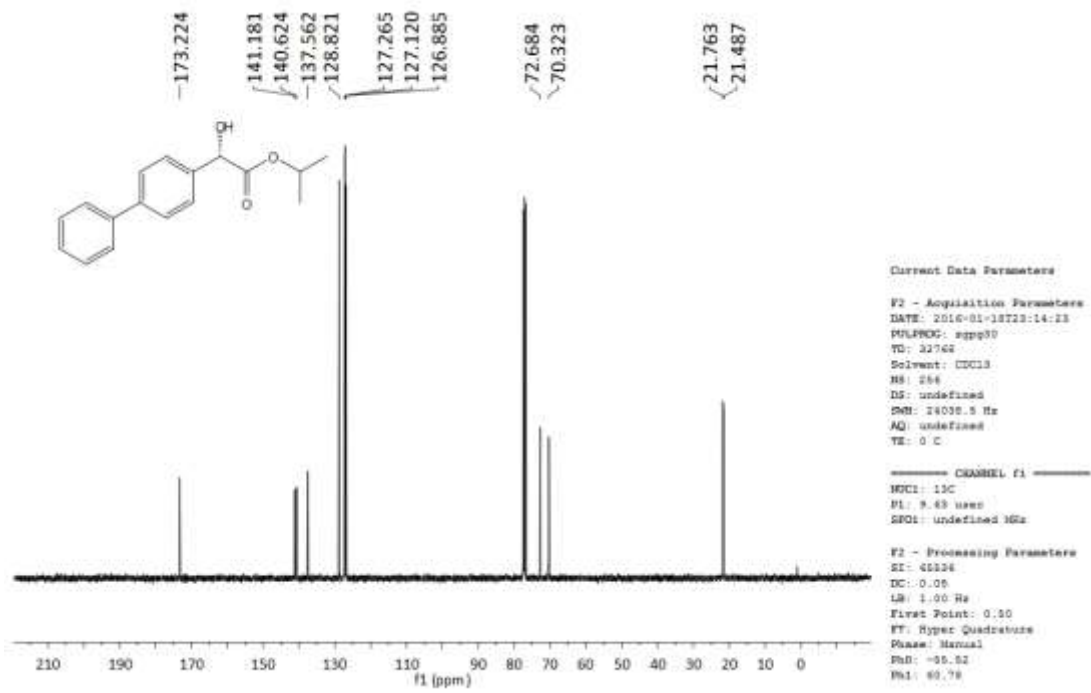

**(S)-iso-propyl  $\alpha$ -hydroxy- $\alpha$ -(4-methoxyphenyl)acetate (2g)**

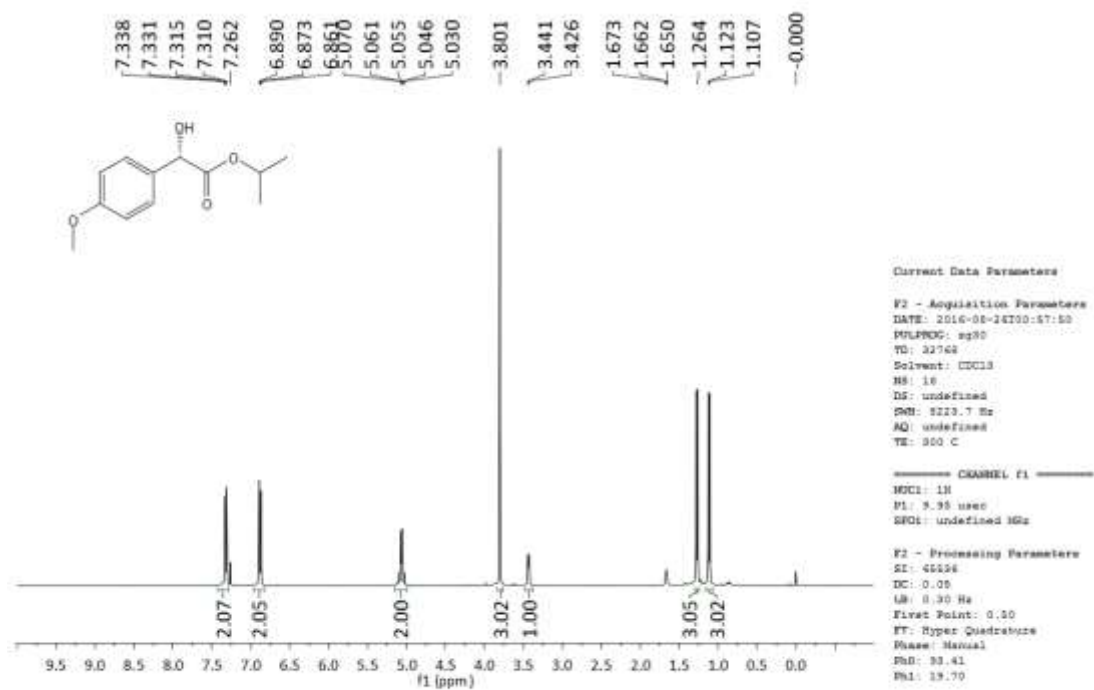

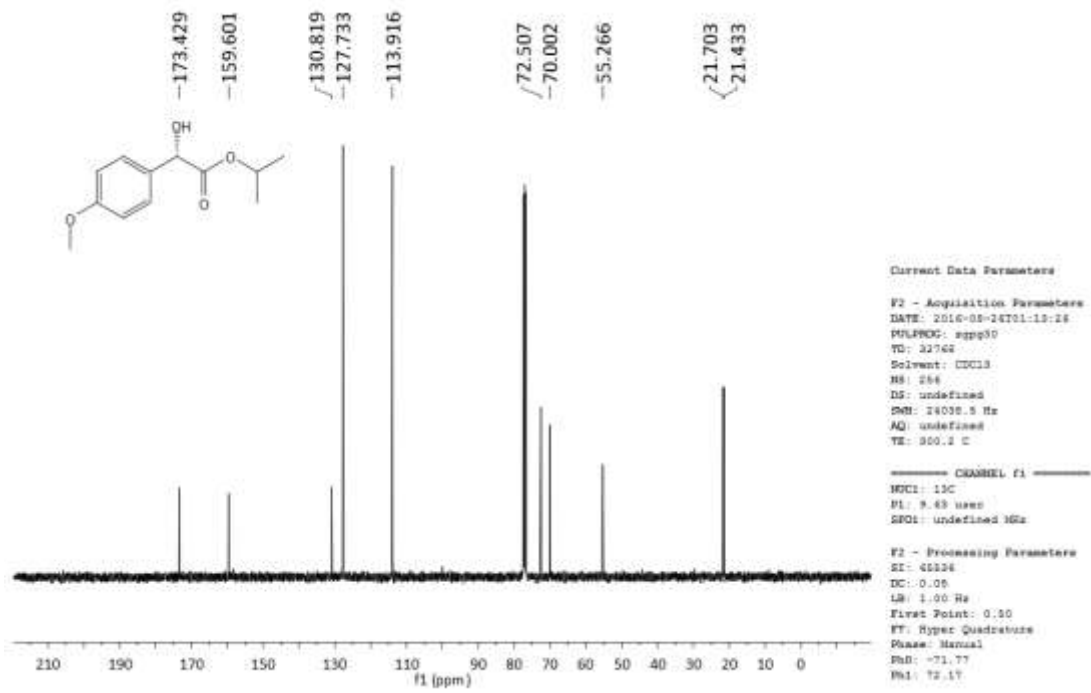

**(S)-iso-propyl  $\alpha$ -hydroxy- $\alpha$ -(3,4-methylenedioxyphenyl)acetate (2h)**

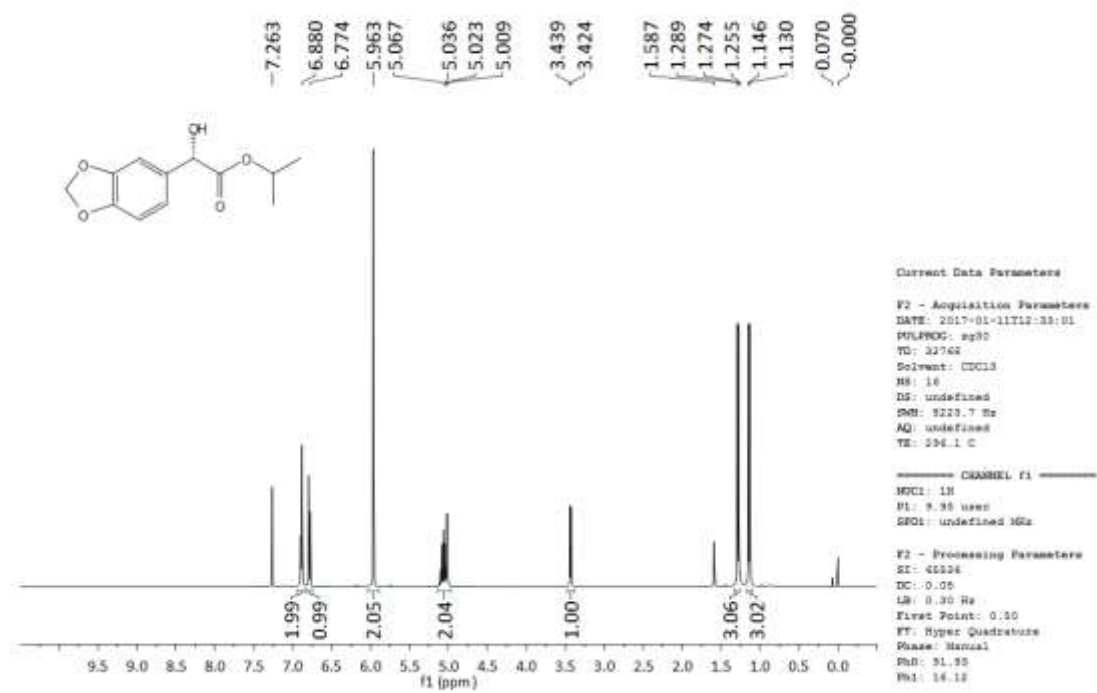

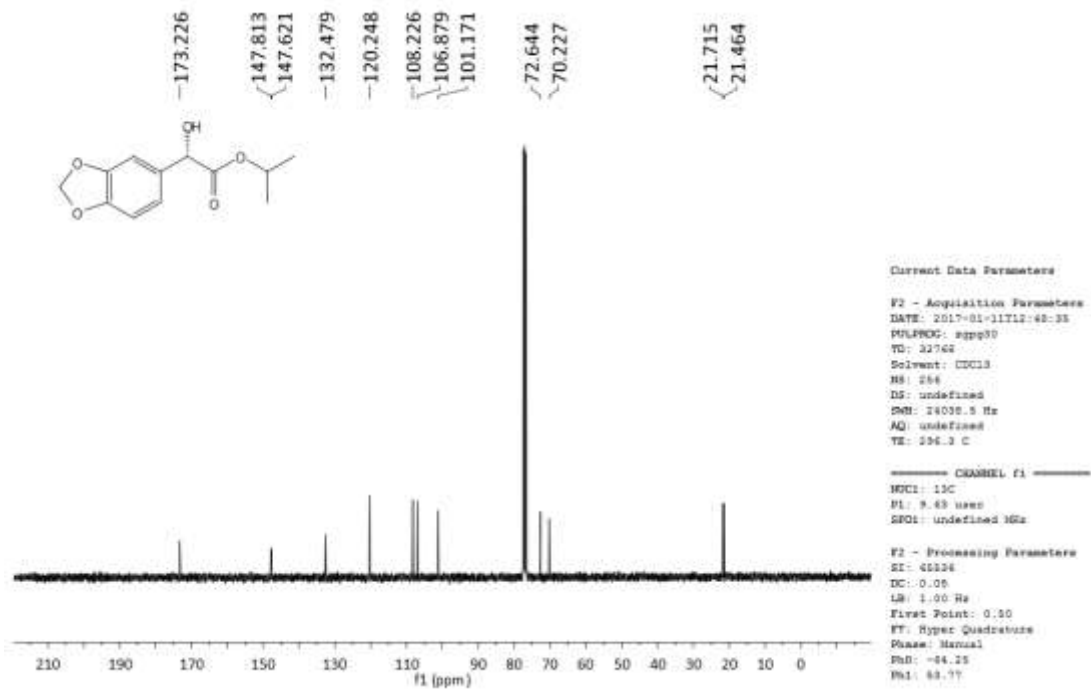

**(S)-iso-propyl  $\alpha$ -hydroxy- $\alpha$ -(2,4-dimethoxyphenyl)acetate (2i)**

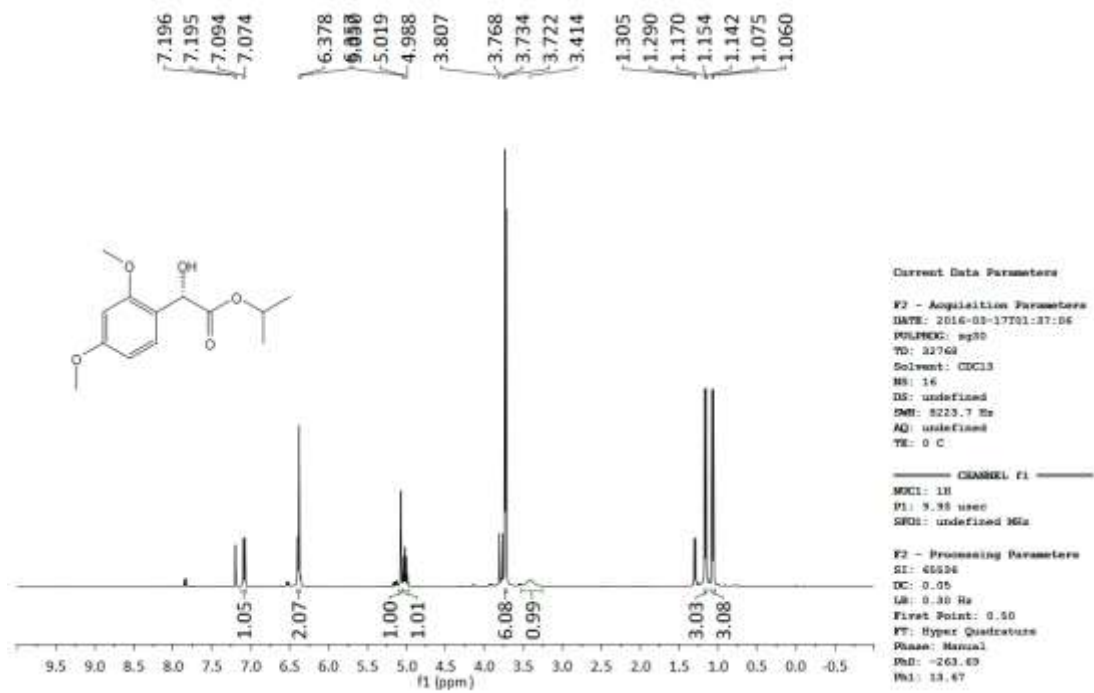



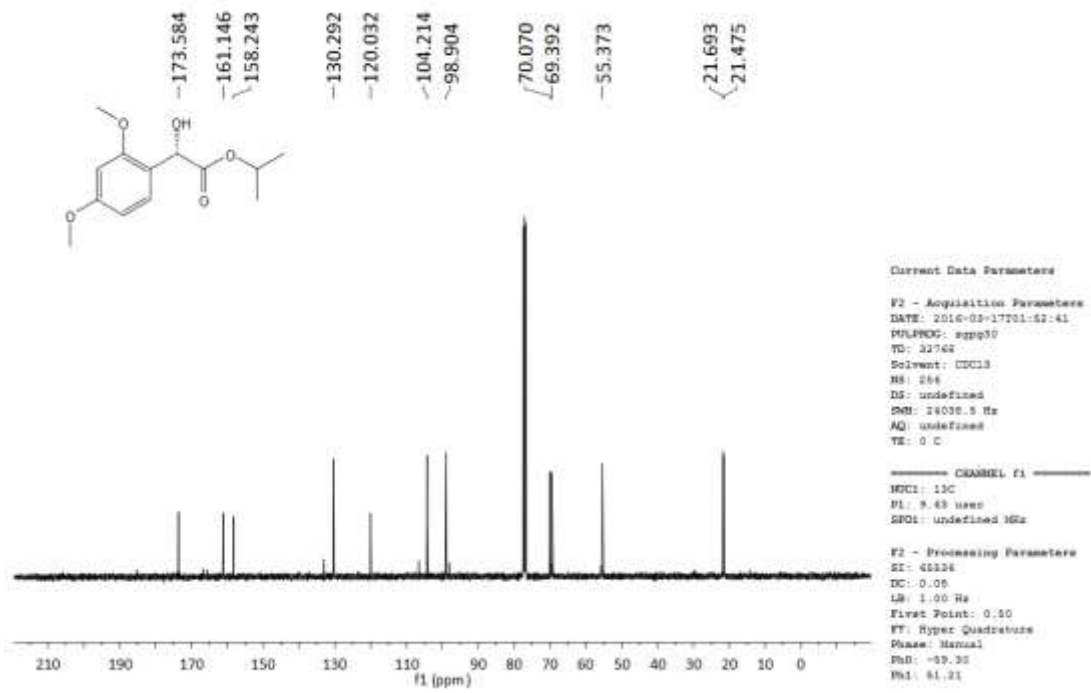

**(S)-iso-propyl  $\alpha$ -hydroxy- $\alpha$ -(2-fluorophenyl)acetate (2j)**

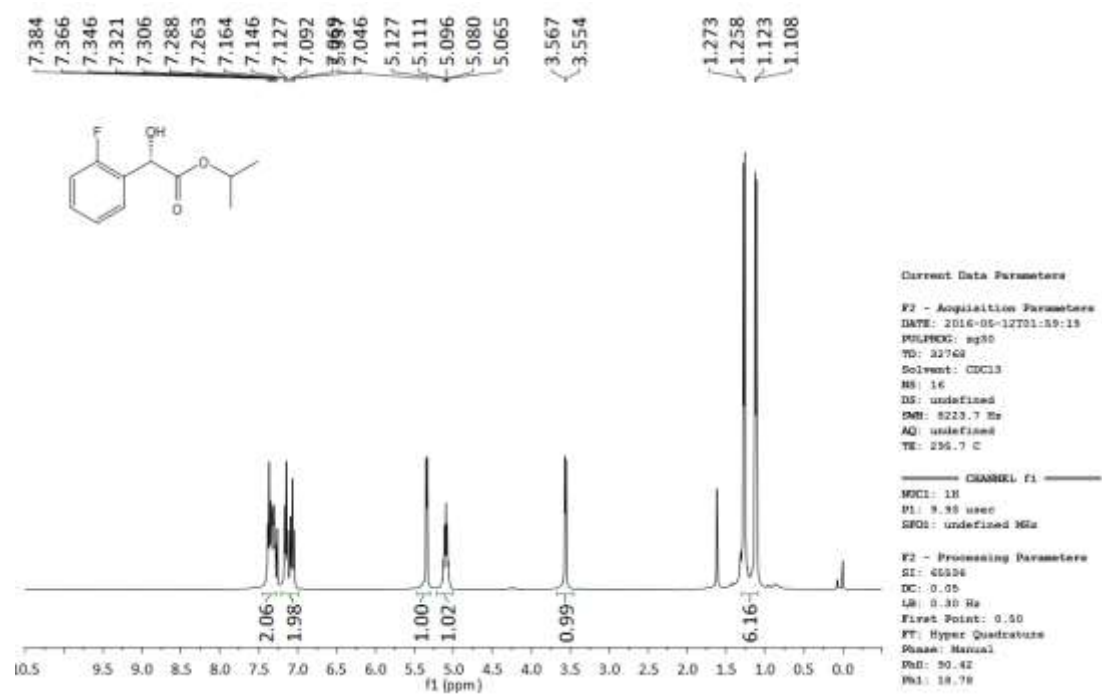

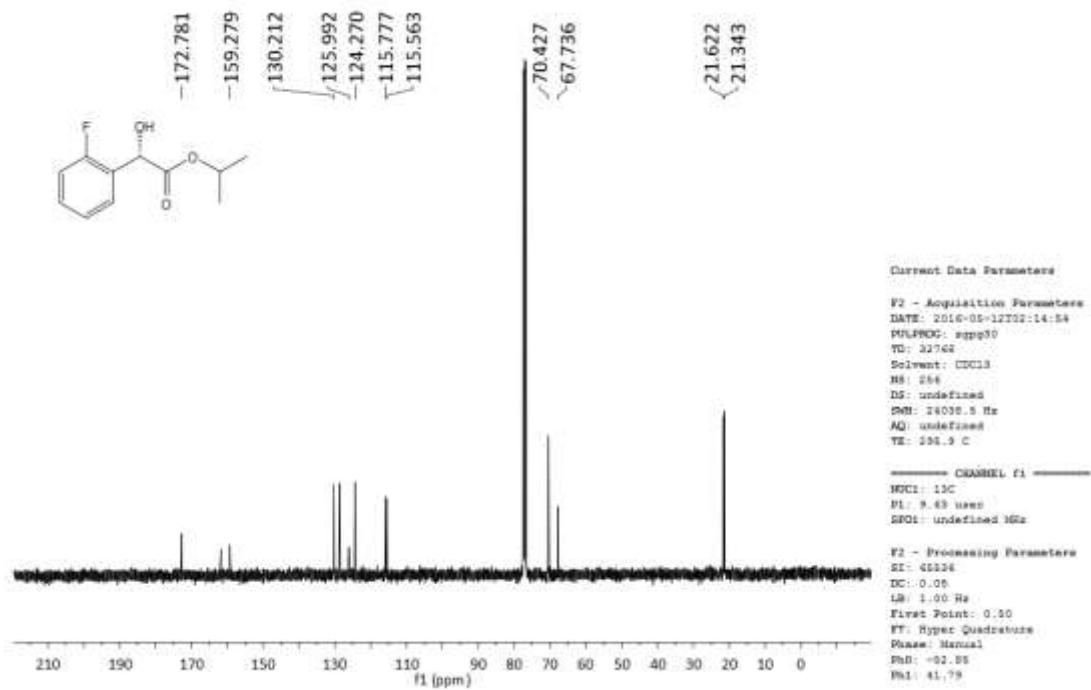

**(S)-iso-propyl  $\alpha$ -hydroxy- $\alpha$ -(4-fluorophenyl)acetate (2k)**

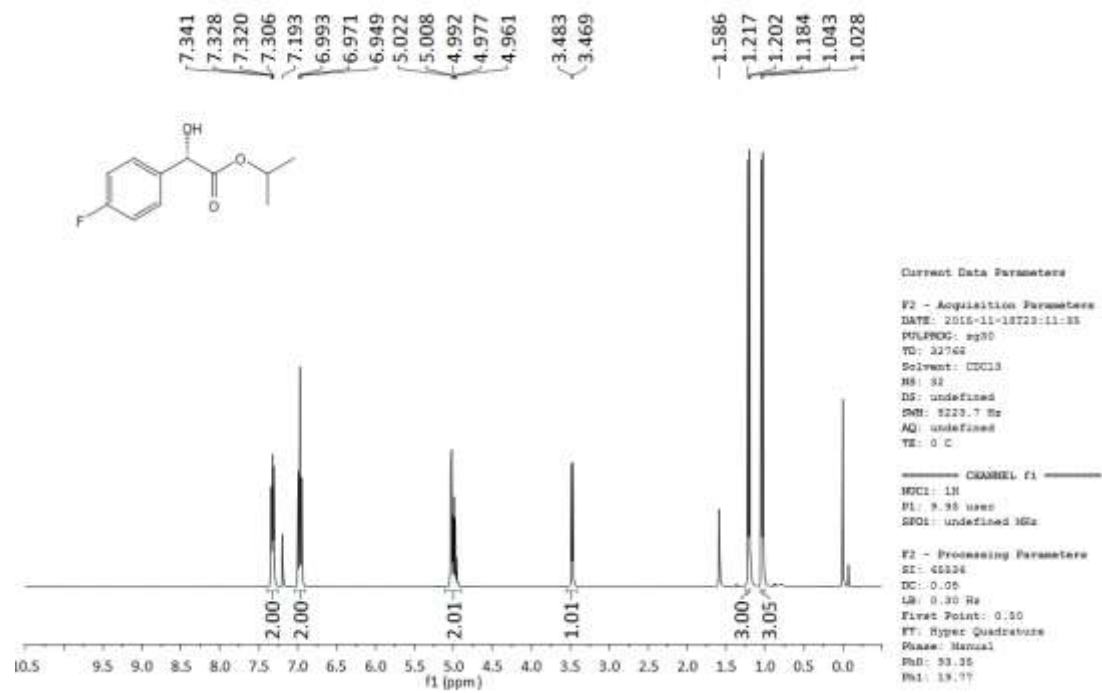

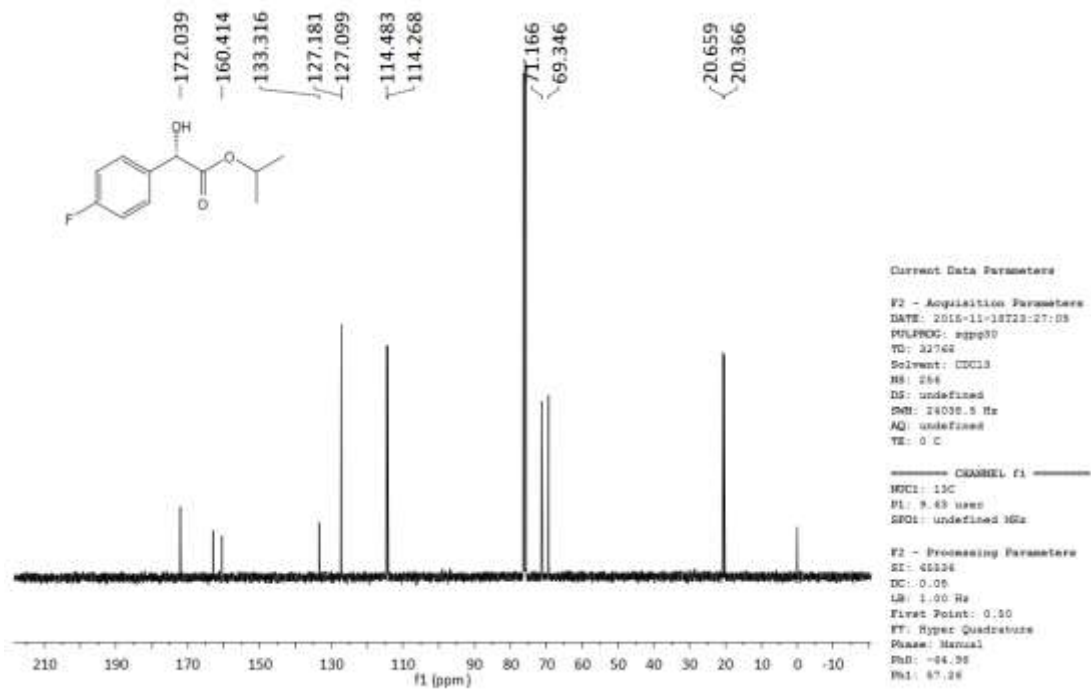

**(S)-iso-propyl  $\alpha$ -hydroxy- $\alpha$ -(2-chlorophenyl)acetate (21)**

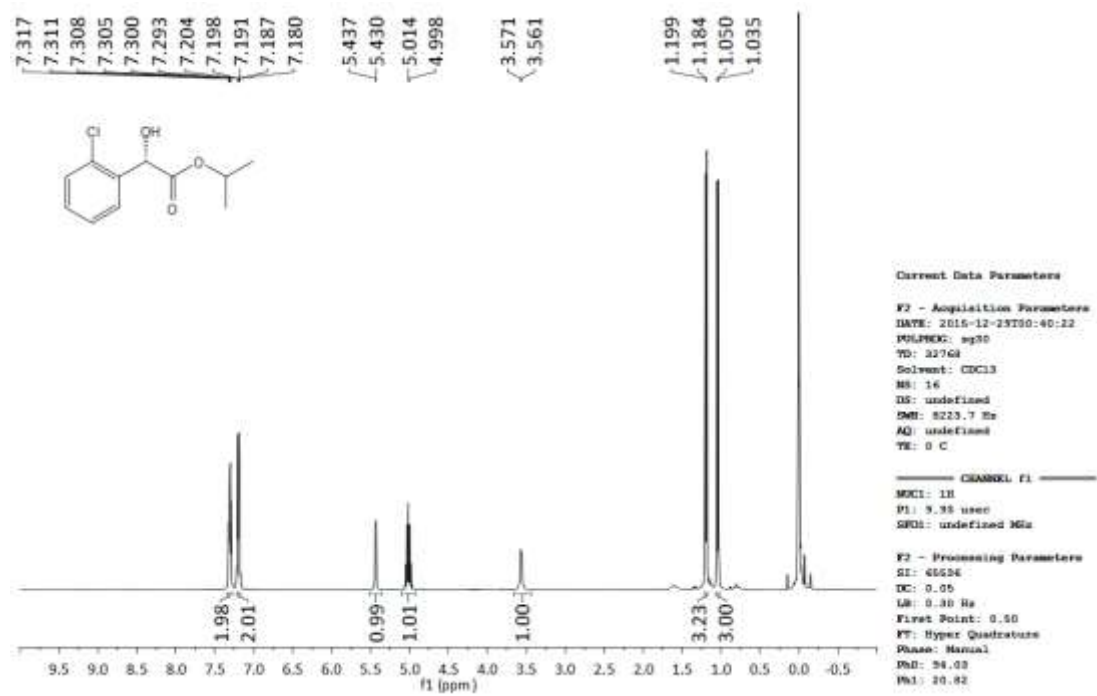

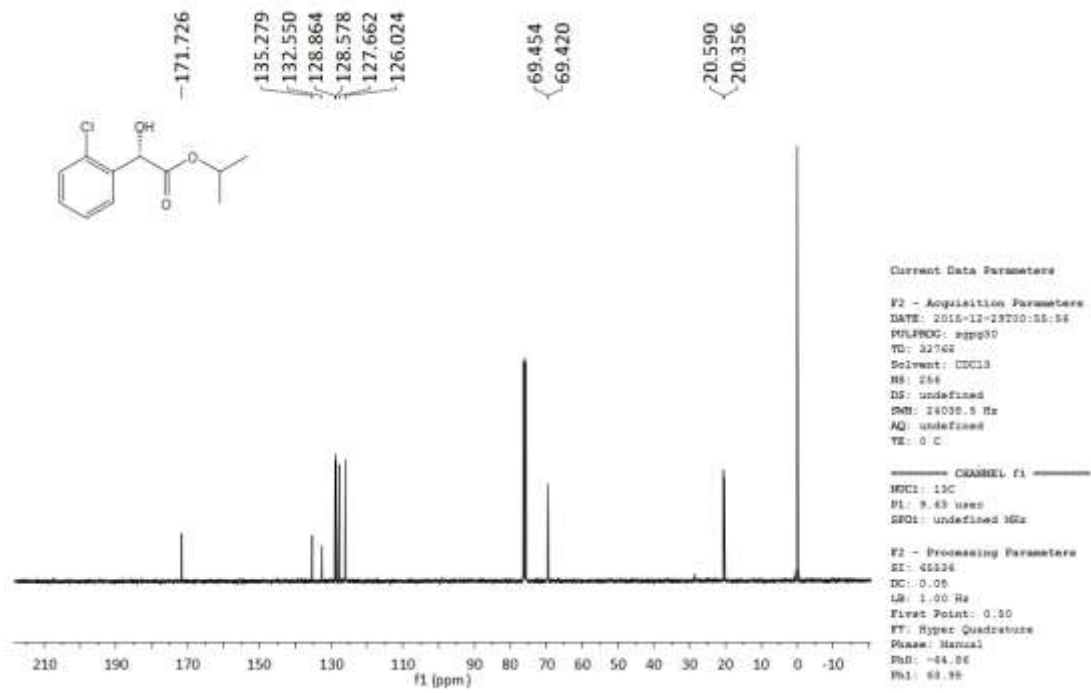

**(S)-iso-propyl  $\alpha$ -hydroxy- $\alpha$ -(4-chlorophenyl)acetate (2m)**

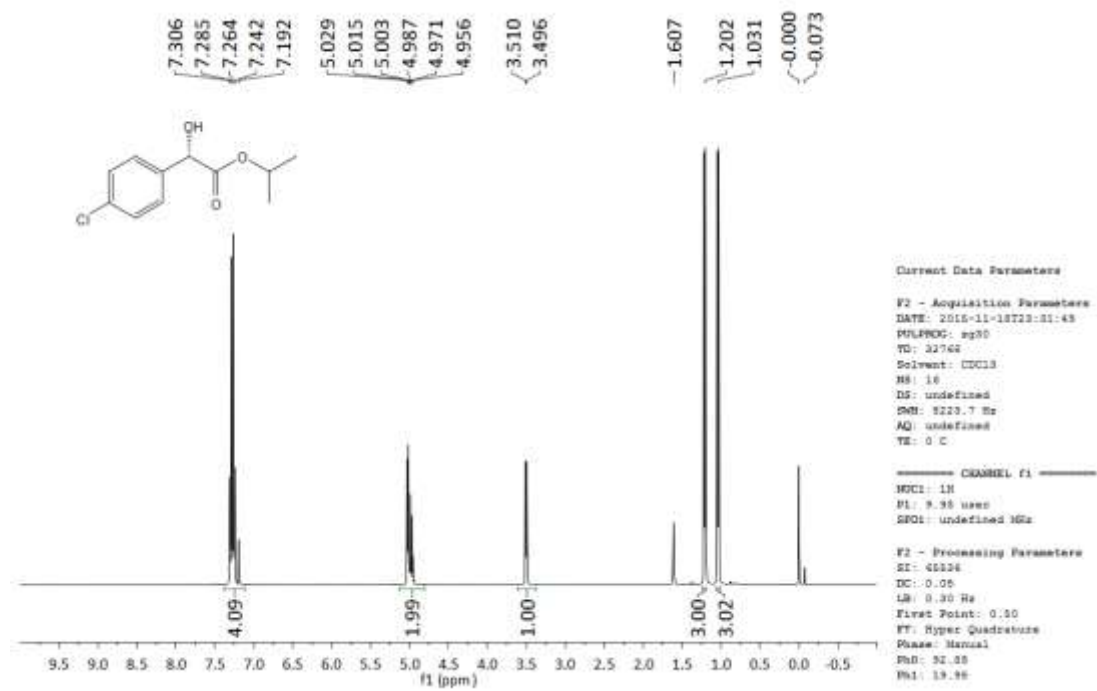



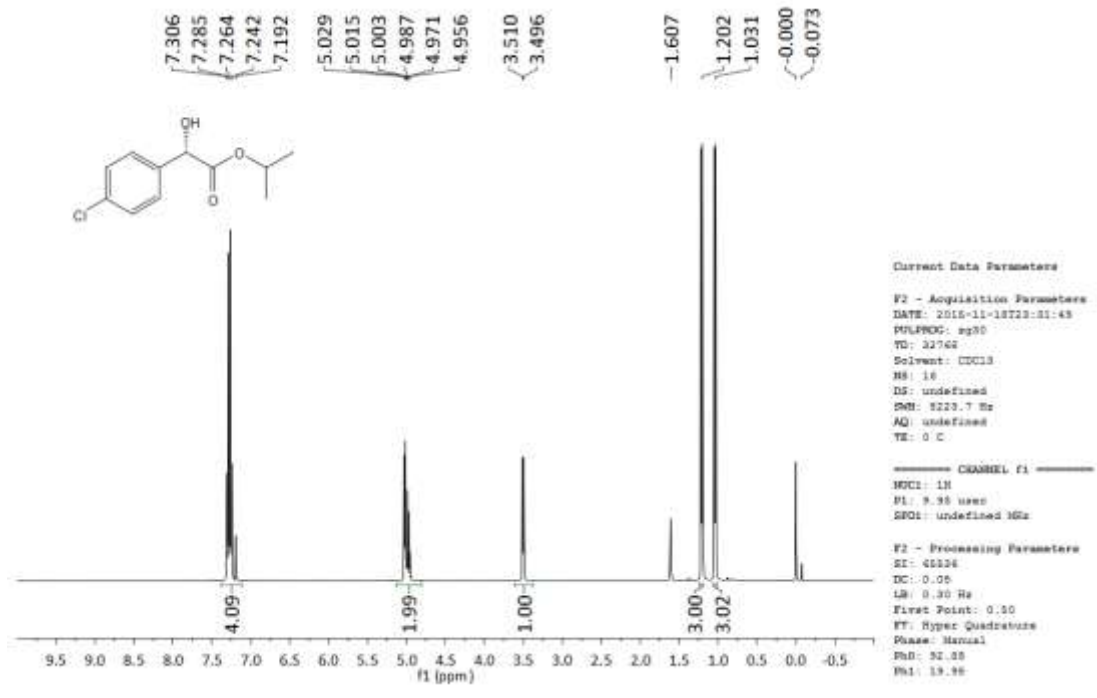

**(S)-iso-propyl  $\alpha$ -hydroxy- $\alpha$ -(2,3,4-trichlorophenyl)acetate (2n)**

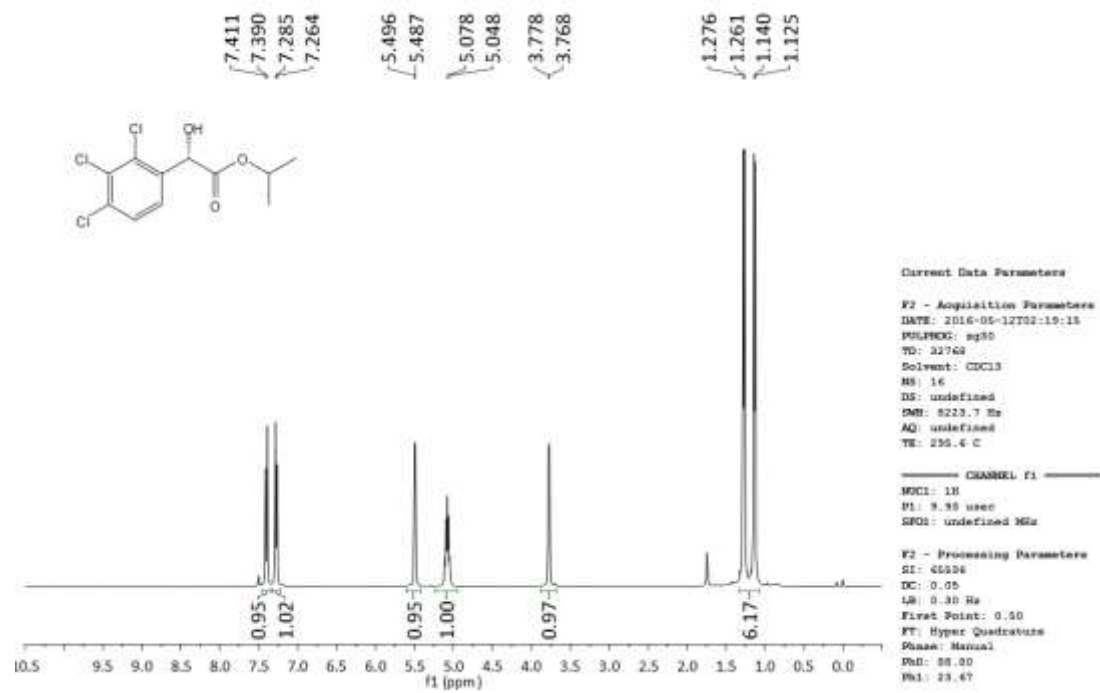

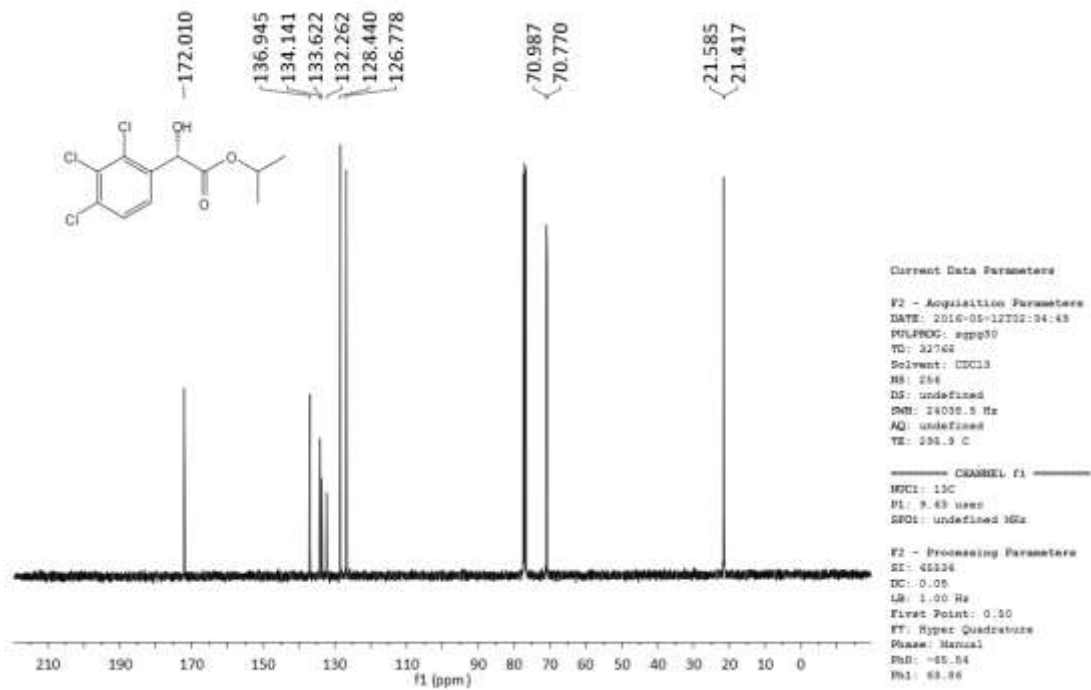

**(S)-iso-propyl  $\alpha$ -hydroxy- $\alpha$ -(2-bromophenyl)acetate (2o)**

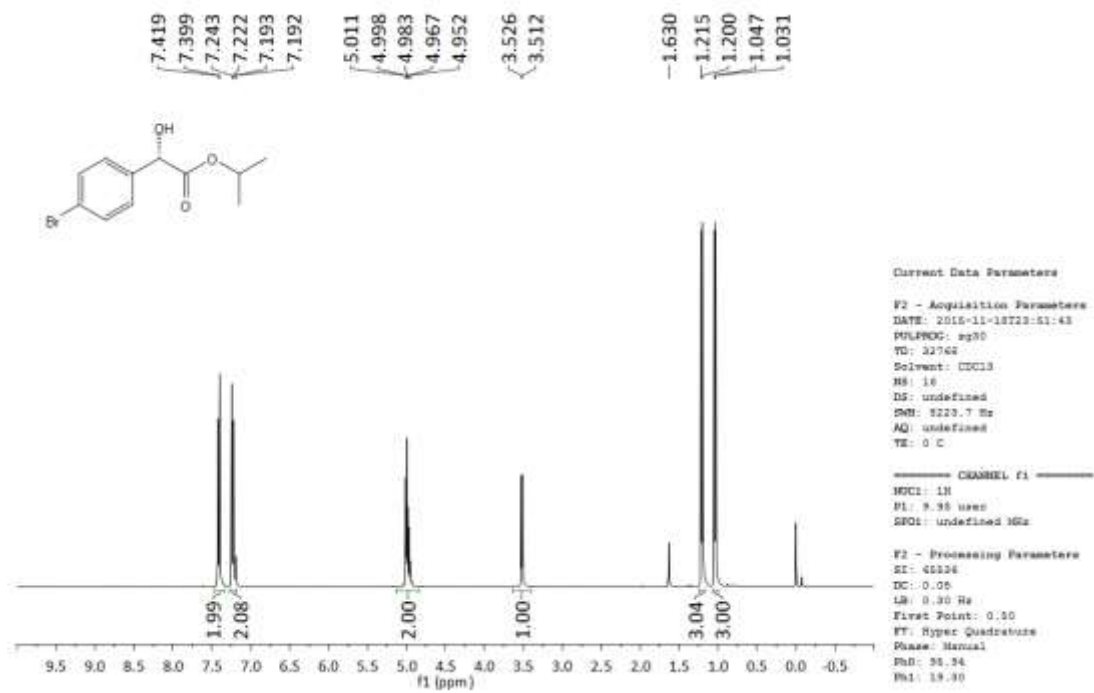

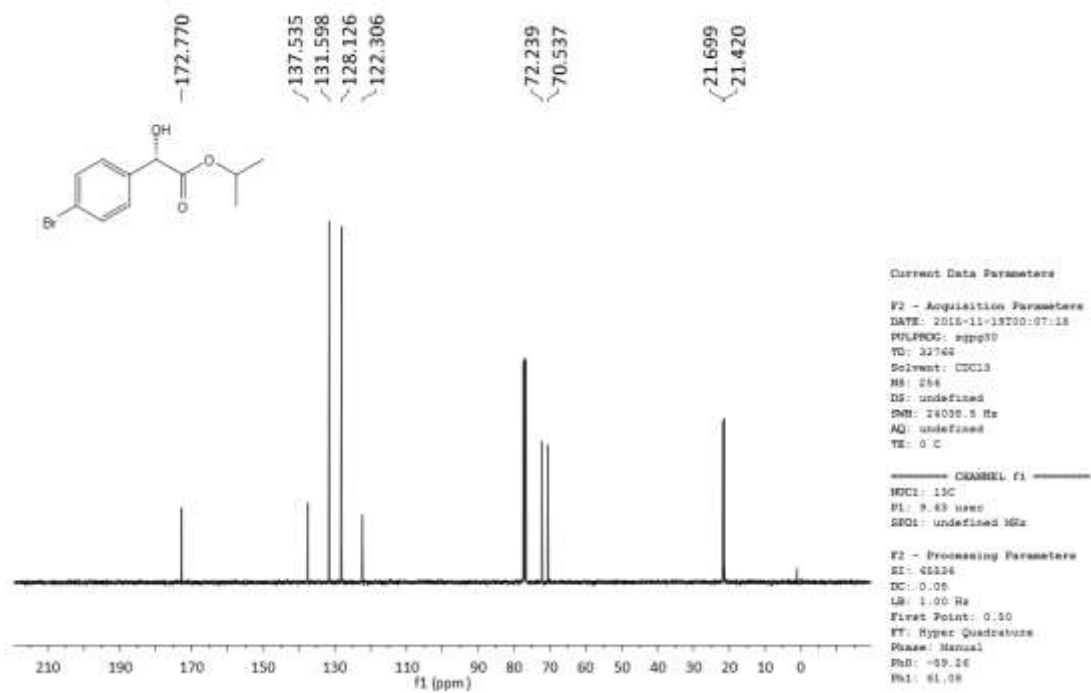

**(S)-iso-propyl  $\alpha$ -hydroxy- $\alpha$ -(4-(trifluoromethyl)phenyl)acetate (2p)**

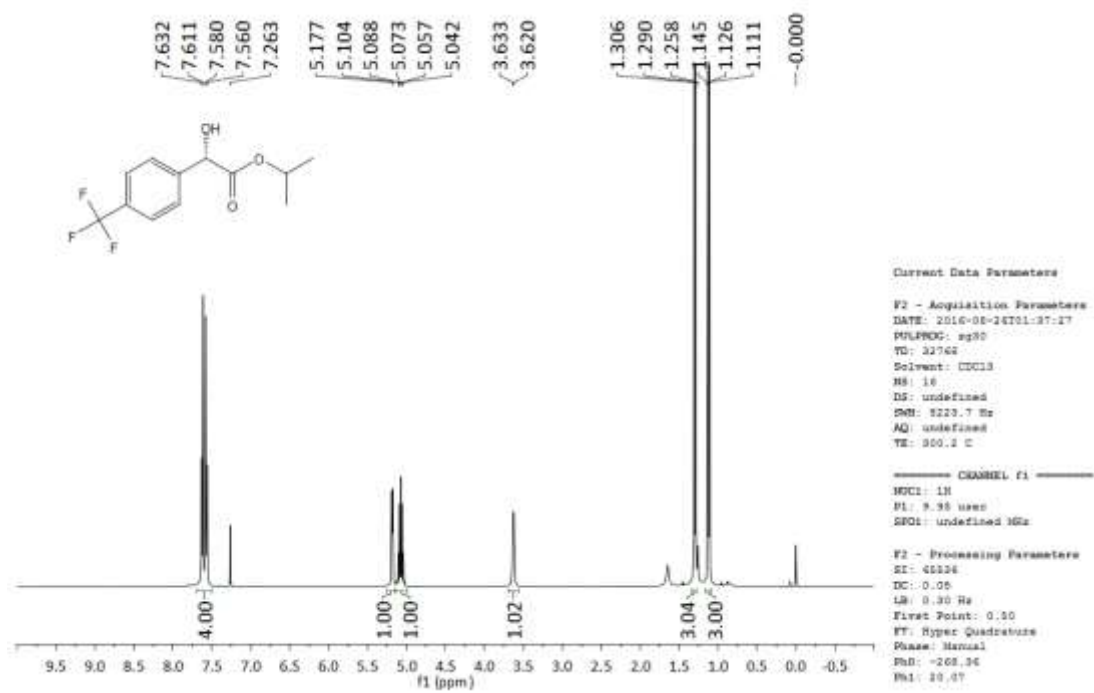

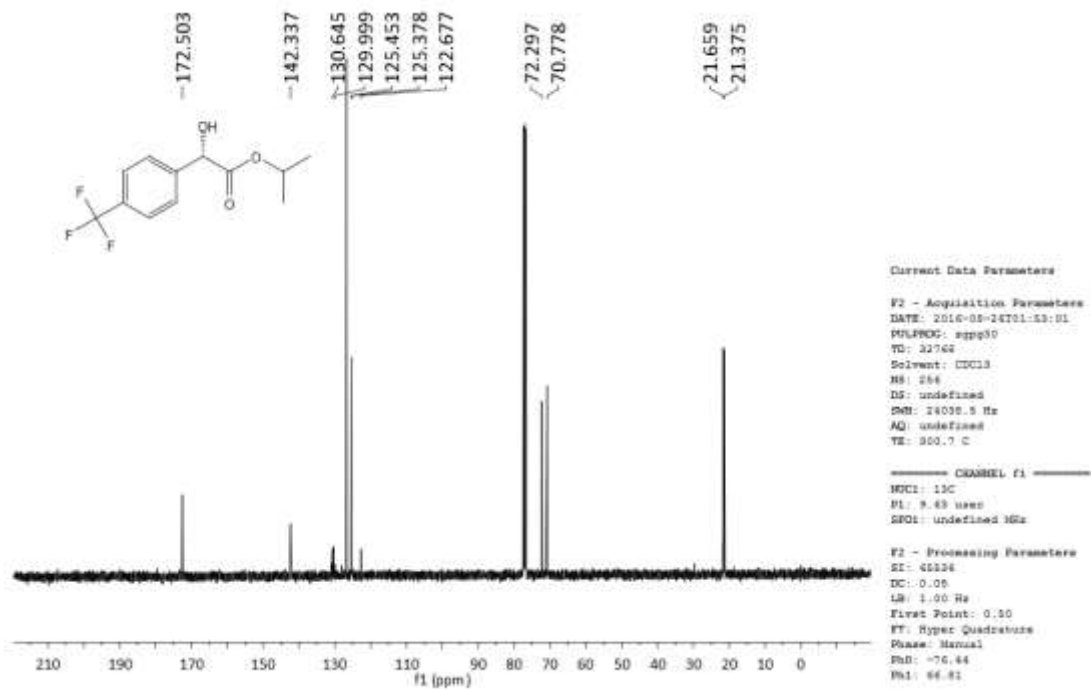

**(S)-iso-propyl  $\alpha$ -hydroxy- $\alpha$ -(naphthalen-1-yl)acetate (2q)**

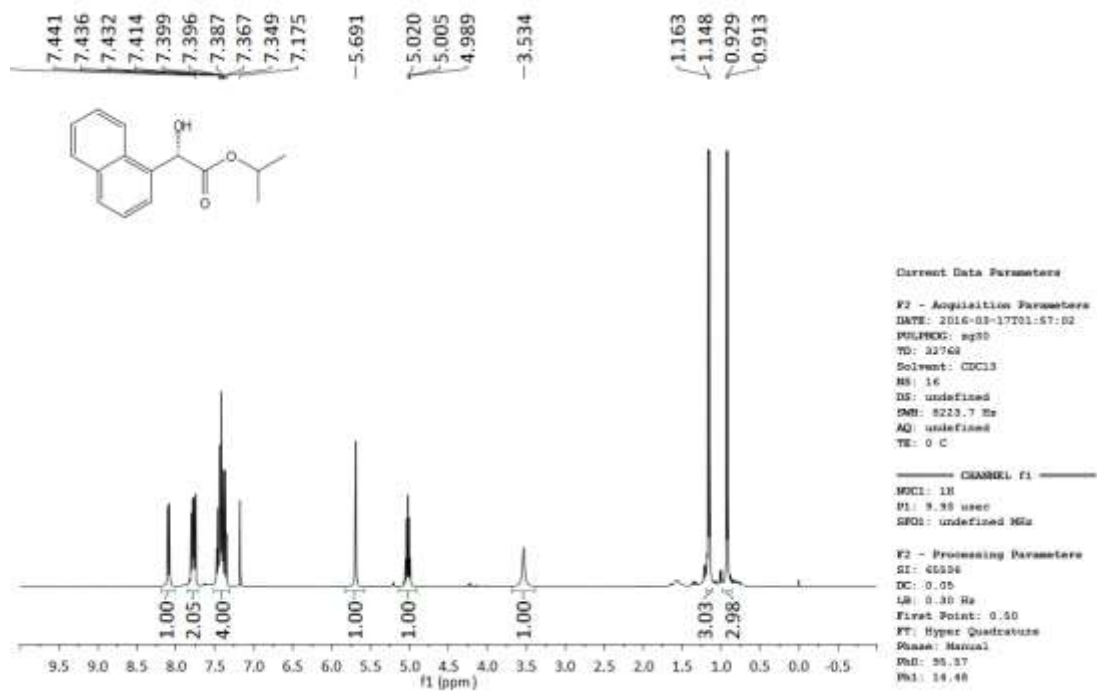



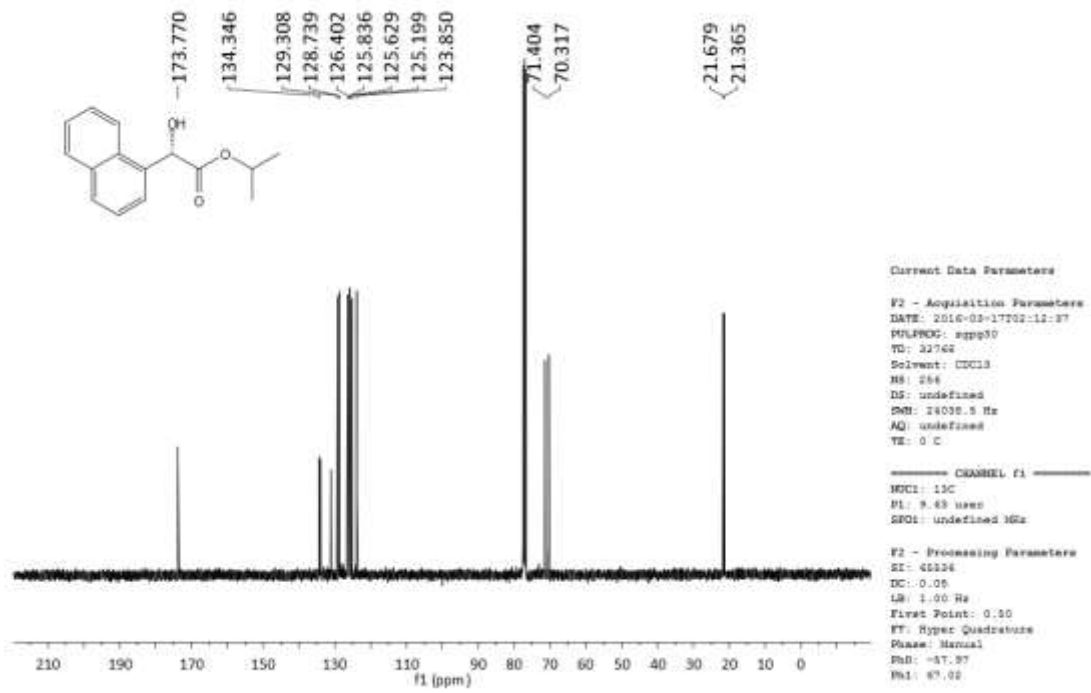

**(S)-iso-propyl  $\alpha$ -hydroxy- $\alpha$ -(naphthalen-2-yl)acetate (2r)**

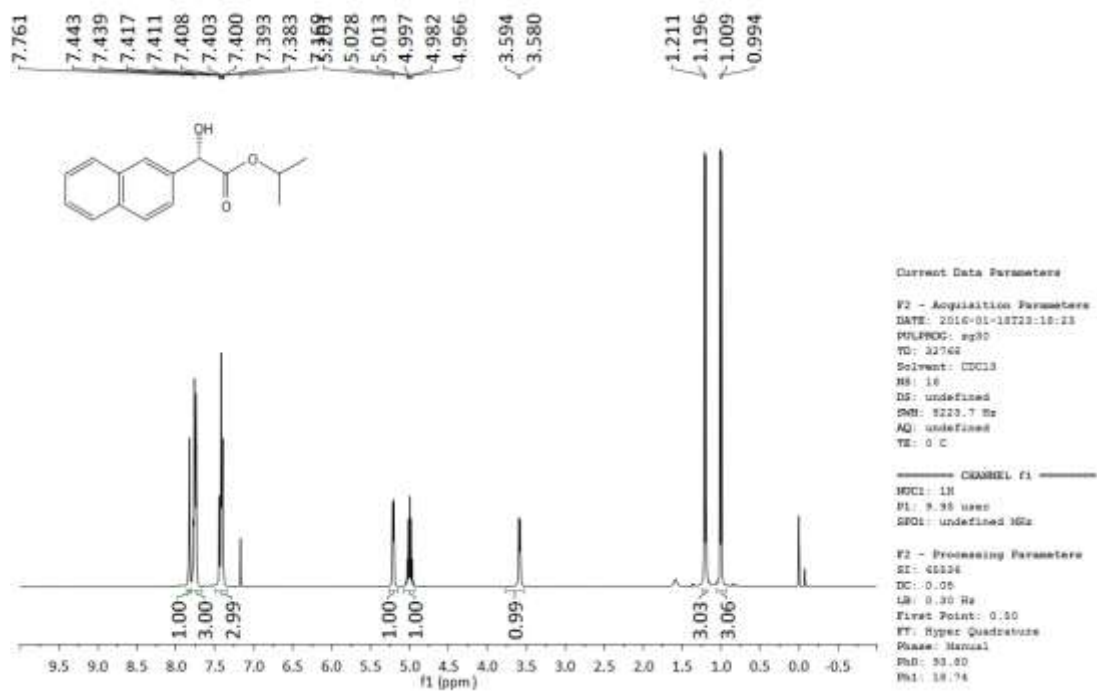

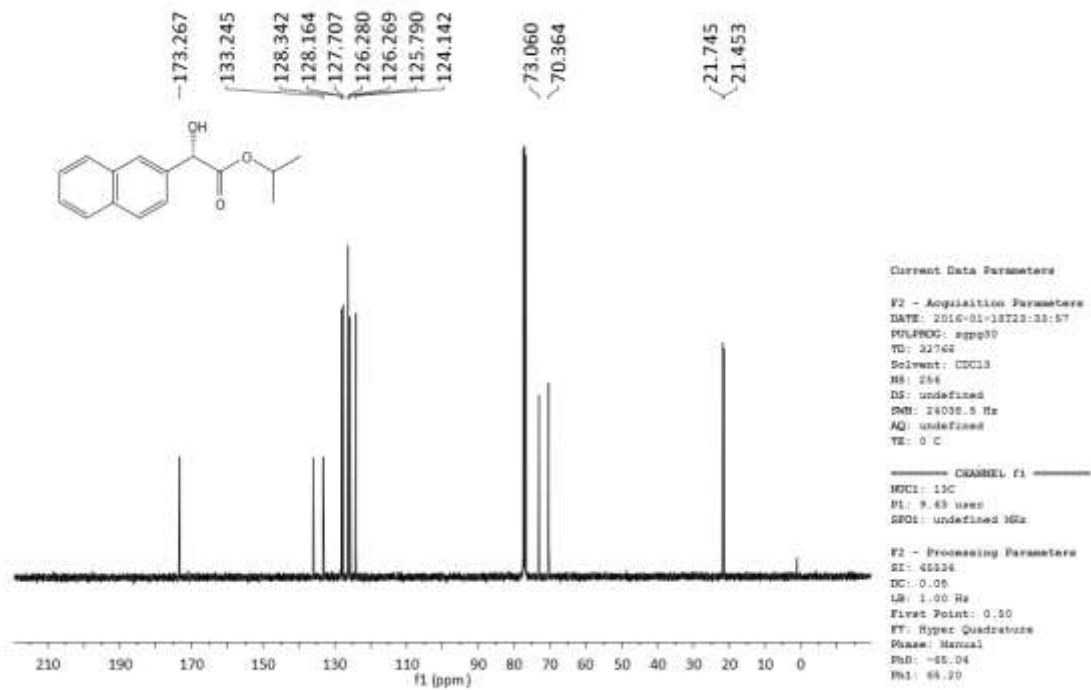

**(S)- 2-bromo-1-phenylethanol (2u)**

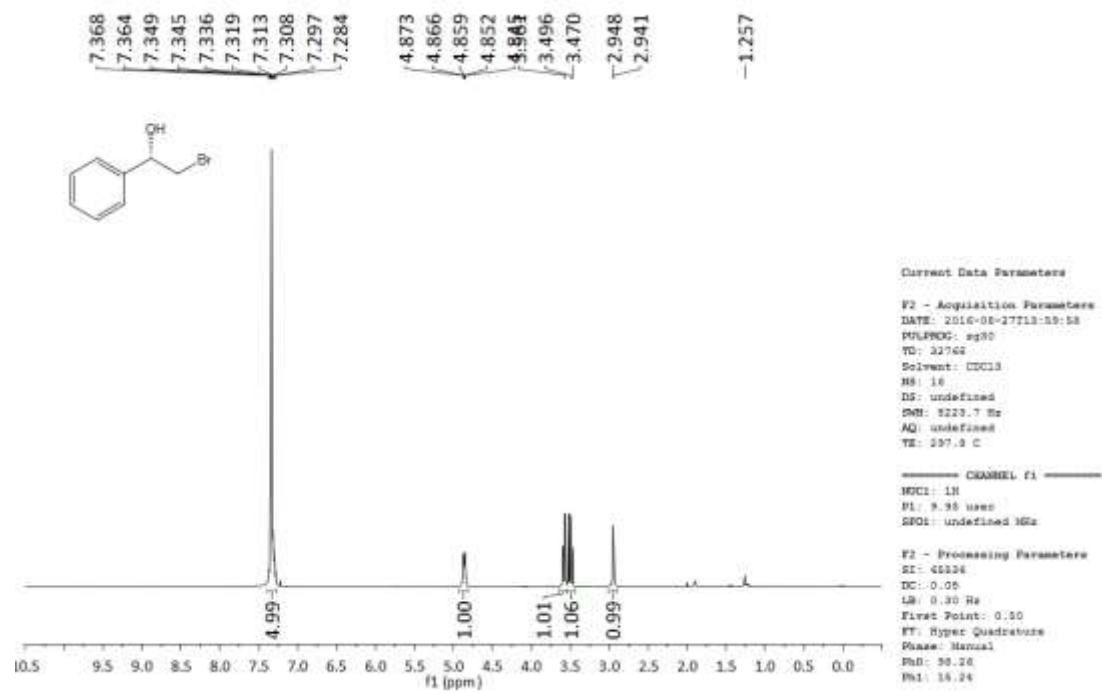

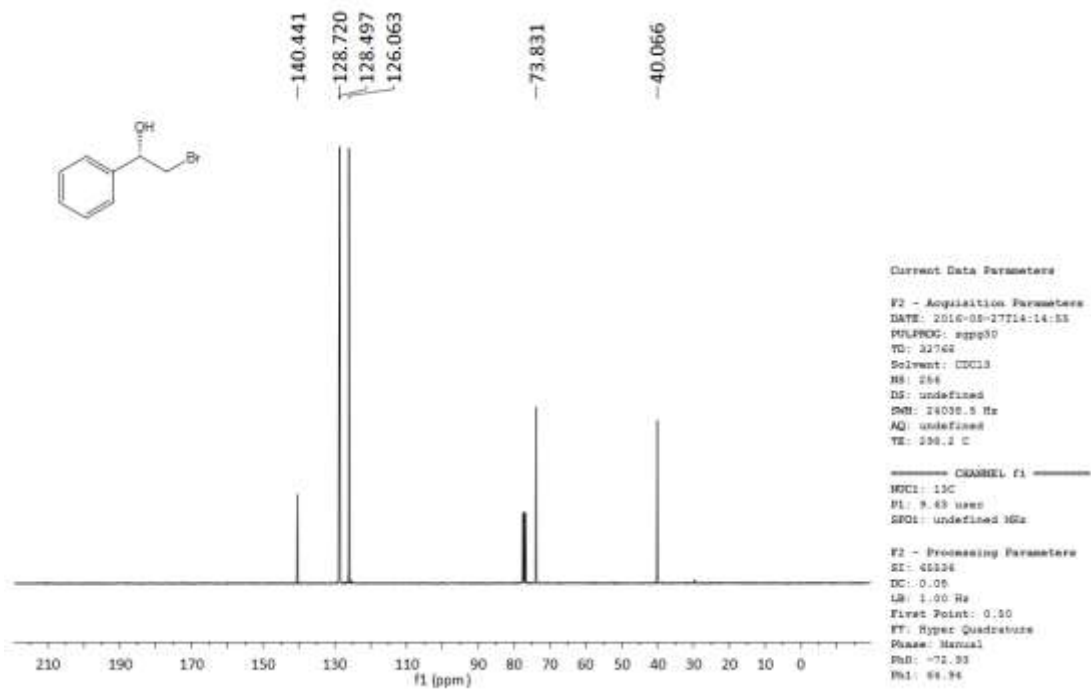

**(S)-iso-propyl 2-benzoxyhexanoate (3s)**

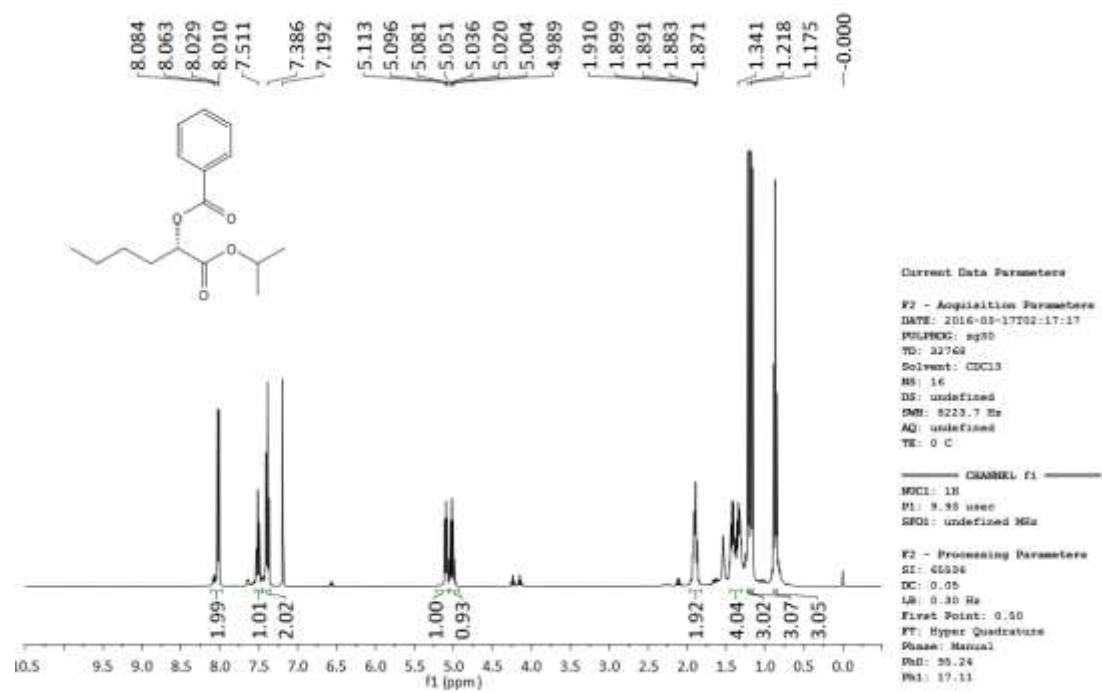

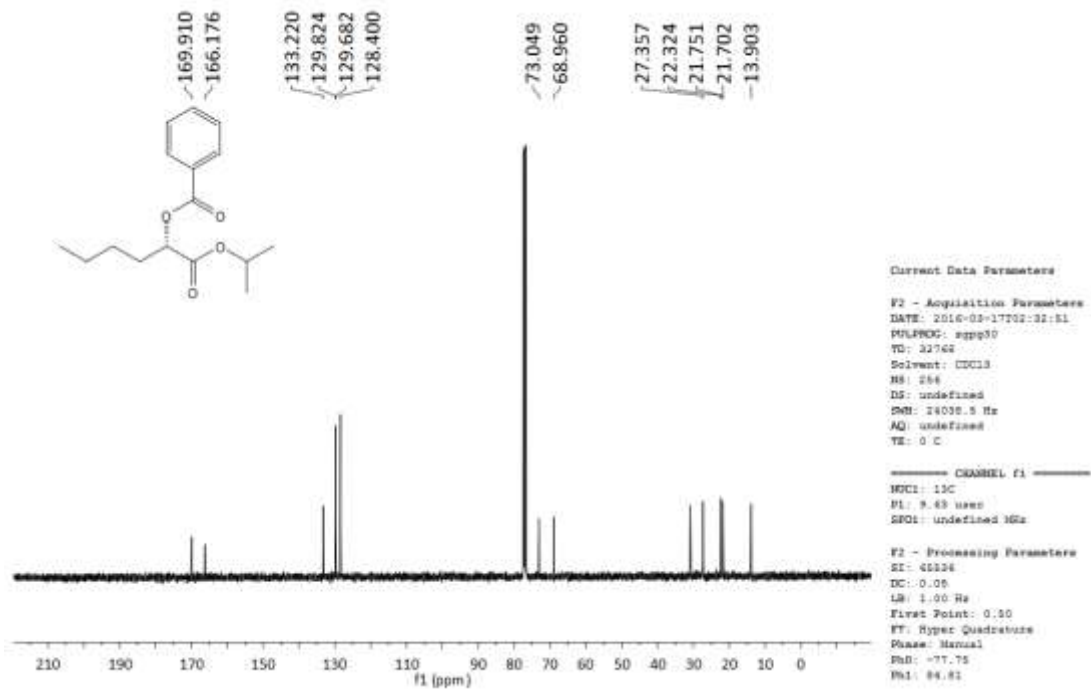

**(S)-iso-propyl 2-hydroxy-2-(adamantan-1-yl)acetate (2t)**

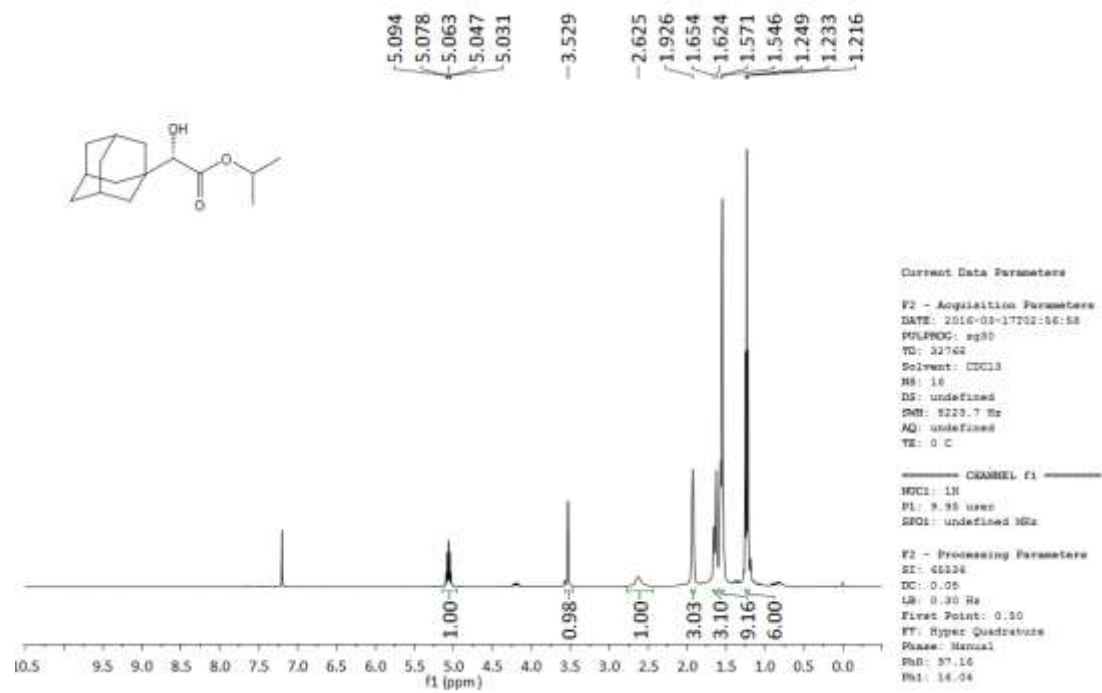



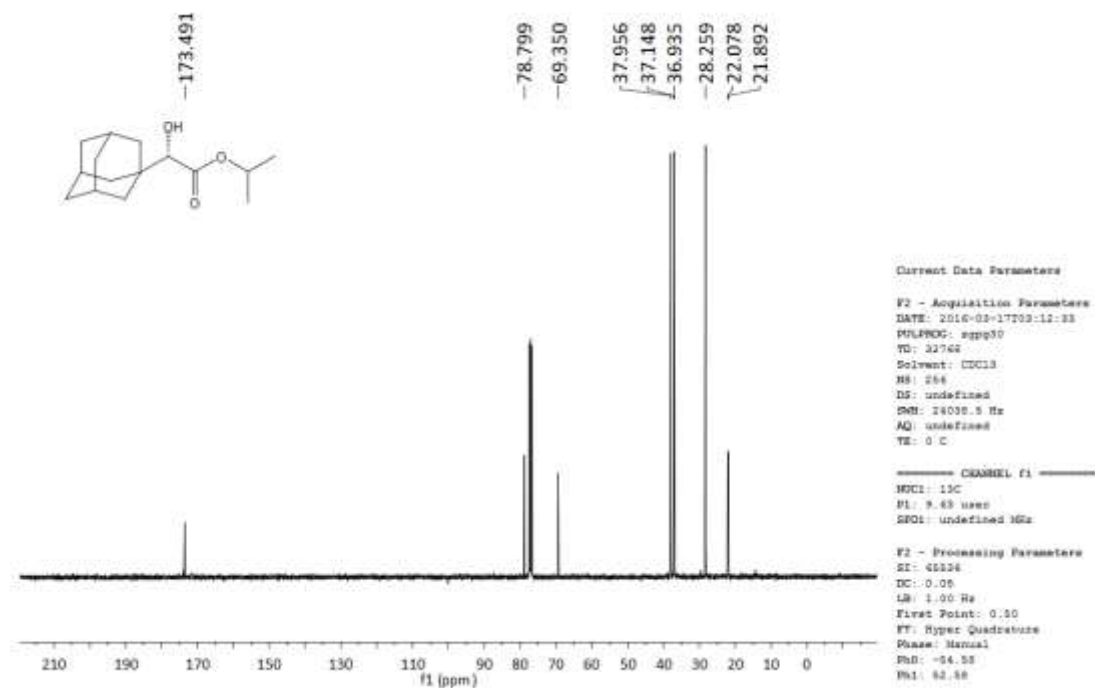

## (L) References

- [1] Z. P. Yu, X. H. Liu, Z. H. Dong, M. S. Xie and X. M. Feng, *Angew. Chem. Int. Ed.* 2008, **120**, 1308.
- [2] P. Wang, W. Tao, X. Sun, S. Liao and Y. Tang, *J. Am. Chem. Soc.* 2013, **135**, 16849.
- [3] A. Sagar, S. Vidyacharan and D. S. Sharada, *RSC Adv.* 2014, **4**, 37047.
- [4] Y. H. Zhang, X. H. Liu, L. Zhou, W. B. Wu, T. Y. Huang, Y. T. Liao, L. L. Lin and X. M. Feng, *Chem. Eur. J.* 2014, **20**, 15884.
- [5] M. L. Contente, I. Serra, F. Molinari, R. Gandolfi, A. Pinto and D. Romano, *Tetrahedron*, 2016, **72**, 3974.
